# Supplementary material for: Isometric Scaling in Developing Long Bones Is Achieved by an Optimal Epiphyseal Growth Balance
Source: PubMed Central journal article supplement (PMC4524611; doi:10.1371/journal.pbio.1002212), 2015-08-04
Supplement: pbio.1002212.s008.pdf [file pbio.1002212.s008.pdf]

Longitudinal 1

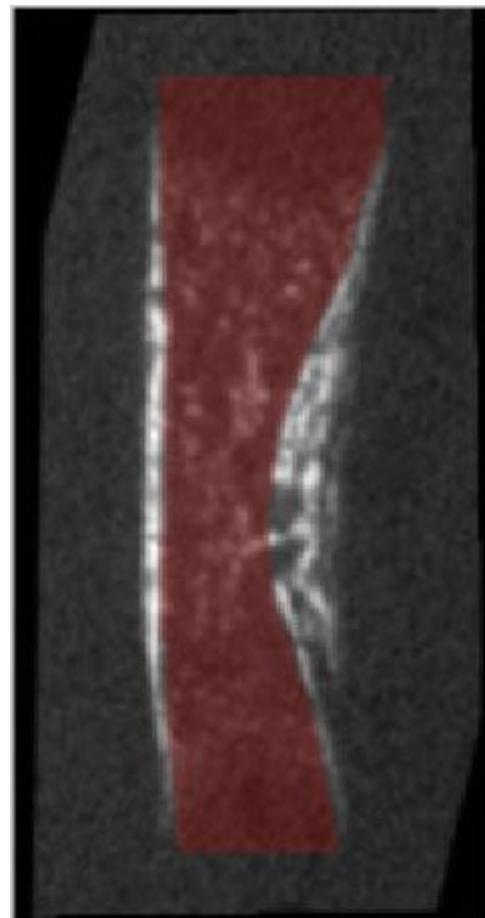

Longitudinal 2

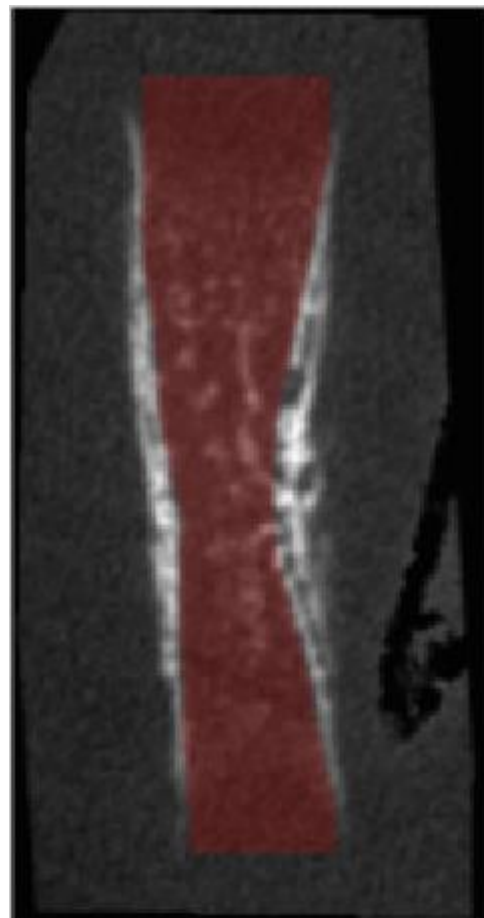

Transverse 1

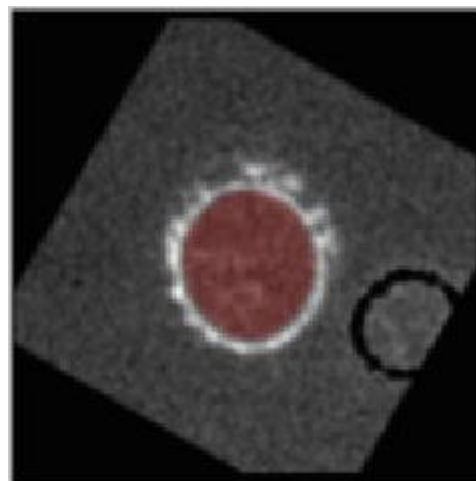

Transverse 2

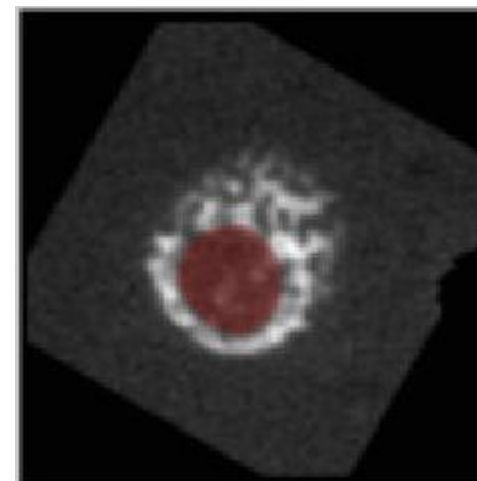

Transverse 3

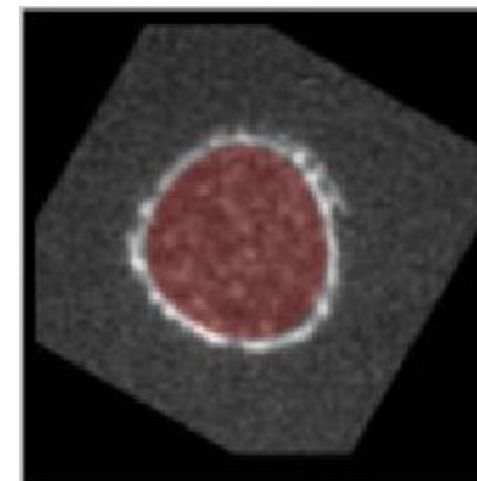

Tibia – E16  
Gray scale = Bone CT slide  
Semi-transparent red = Masked regions

Longitudinal 1

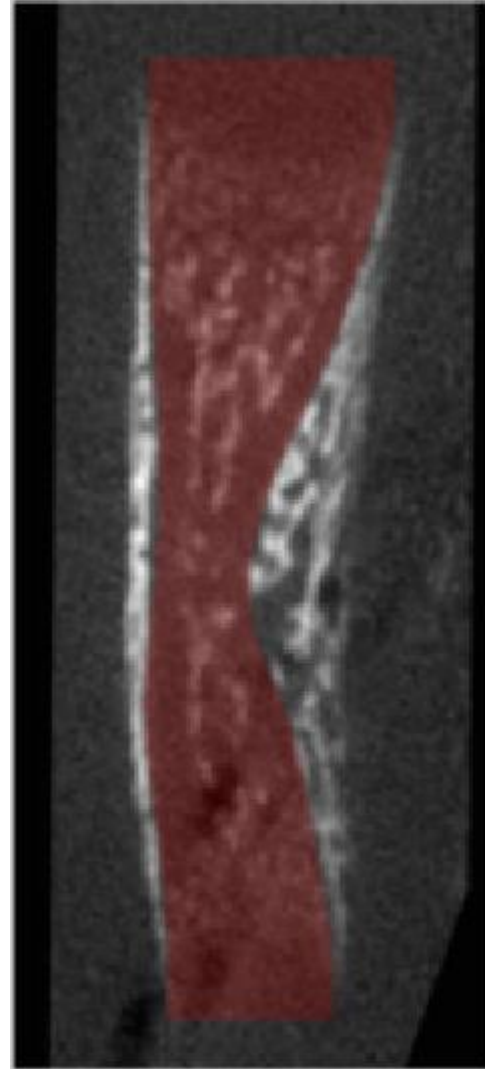

Longitudinal 2

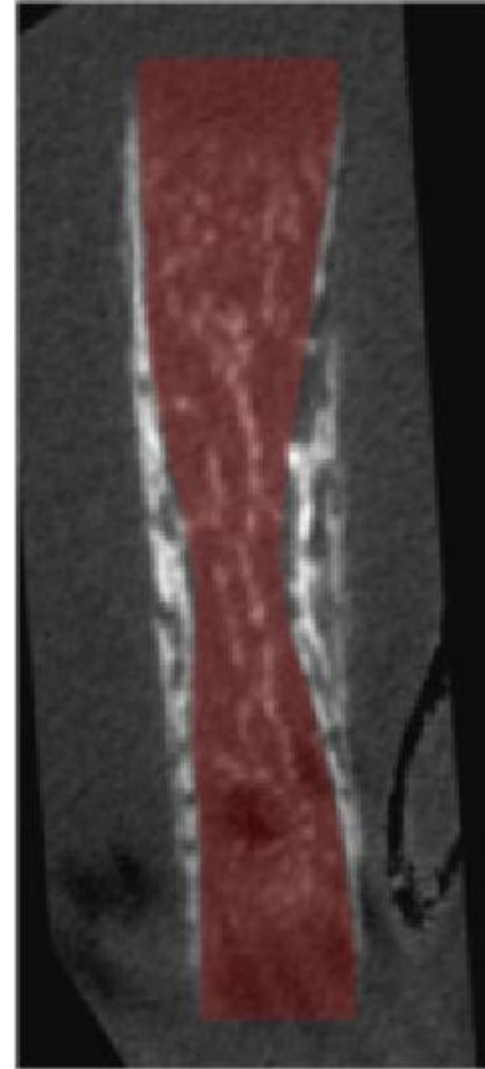

Tibia – E17

Gray scale = Bone CT slide

Semi-transparent red = Masked regions

Transverse 1

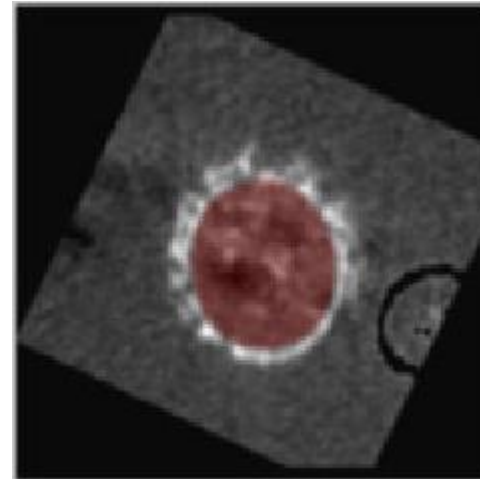

Transverse 2

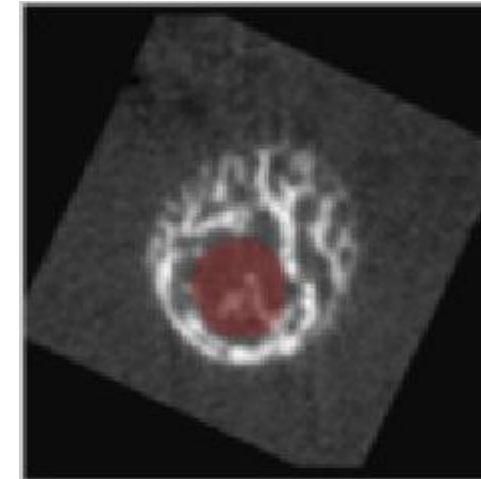

Transverse 3

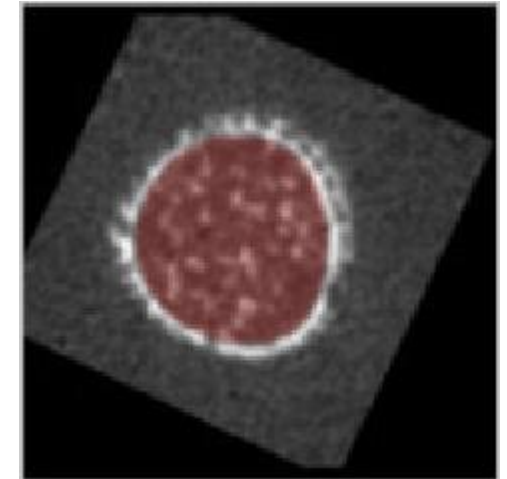

Longitudinal 1

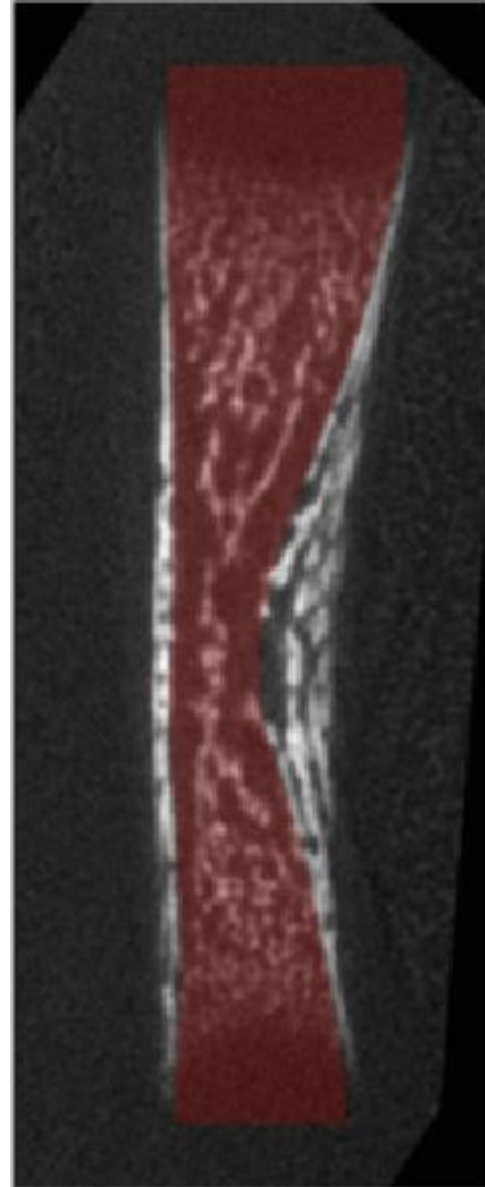

Longitudinal 2

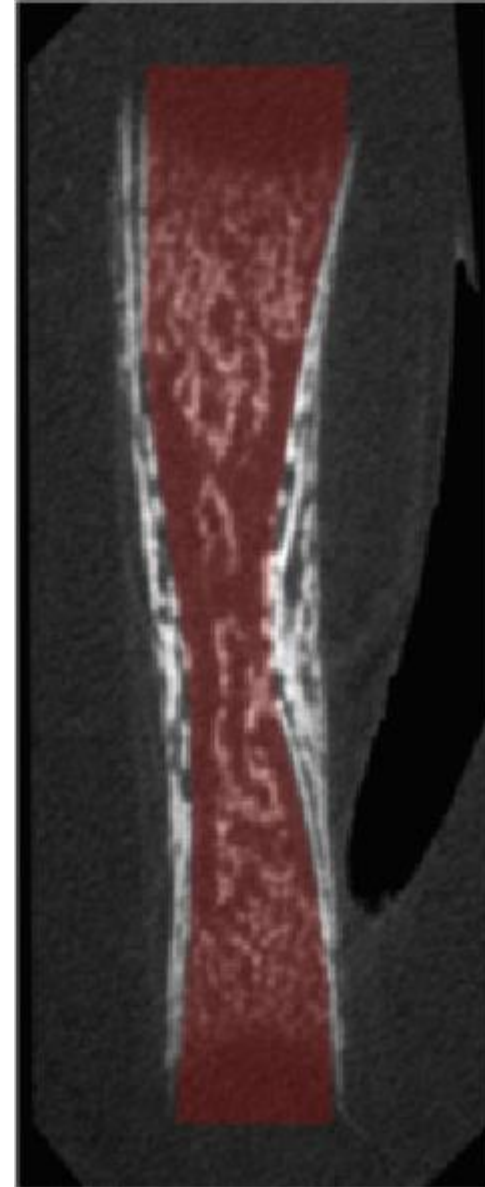

Transverse 1

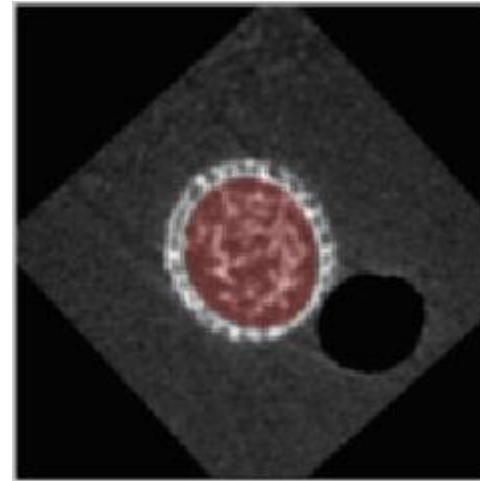

Transverse 2

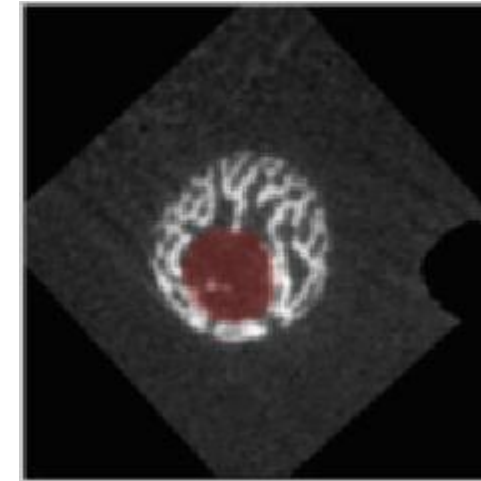

Transverse 3

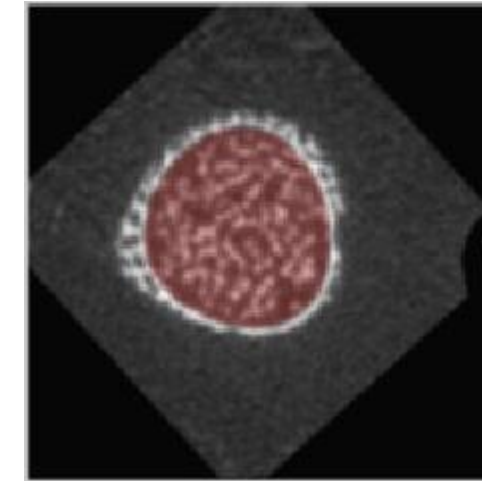

Tibia - E18  
Gray scale = Bone CT slide  
Semi-transparent red = Masked regions

Longitudinal 1

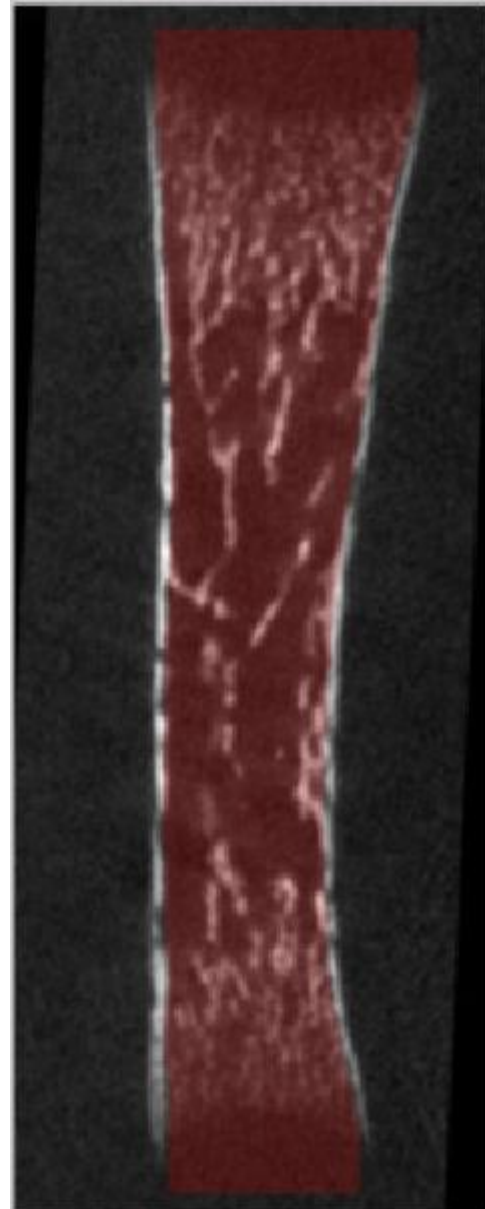

Longitudinal 2

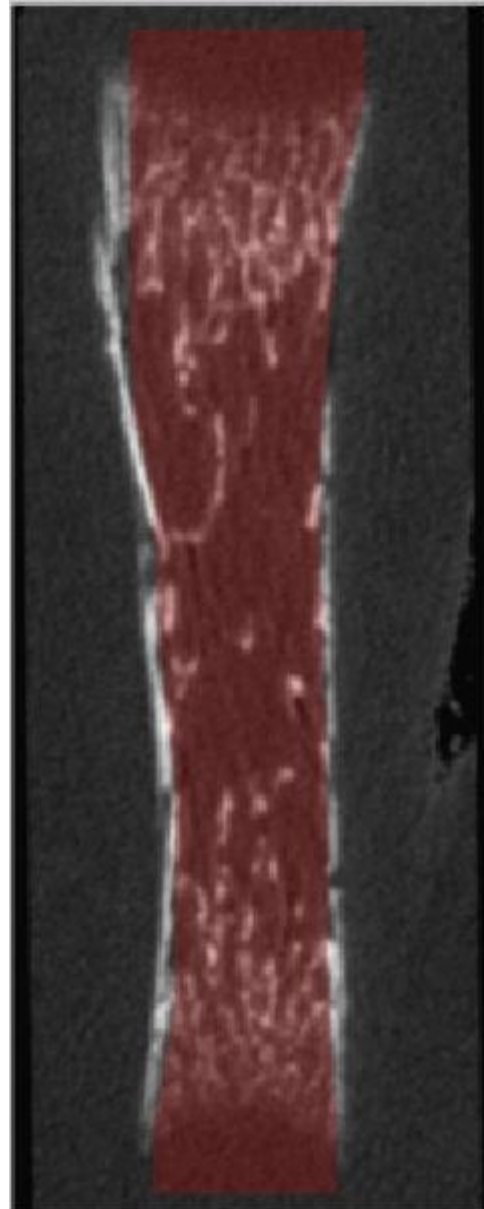

Transverse 1

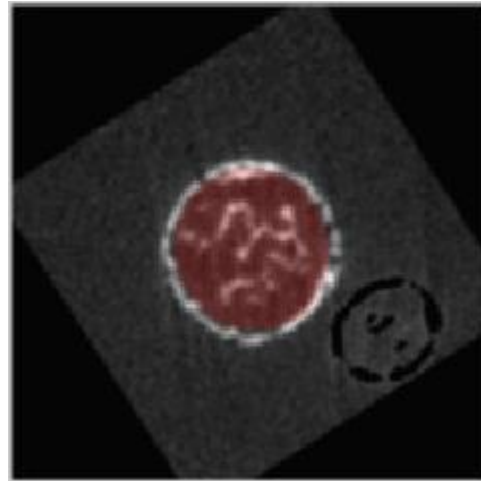

Transverse 2

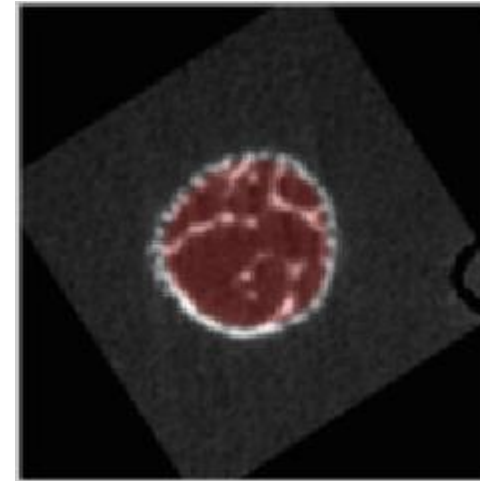

Transverse 3

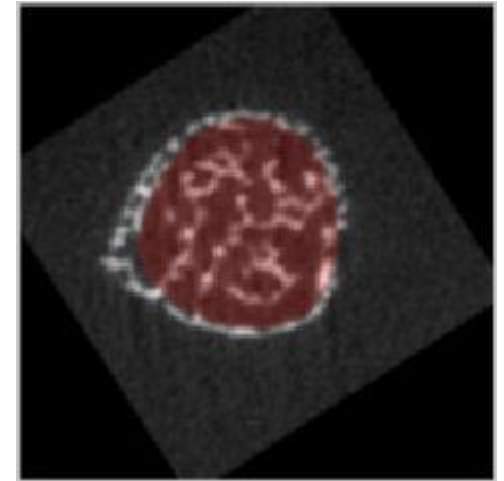

Tibia - P1  
Gray scale = Bone CT slide  
Semi-transparent red = Masked regions

Longitudinal 1

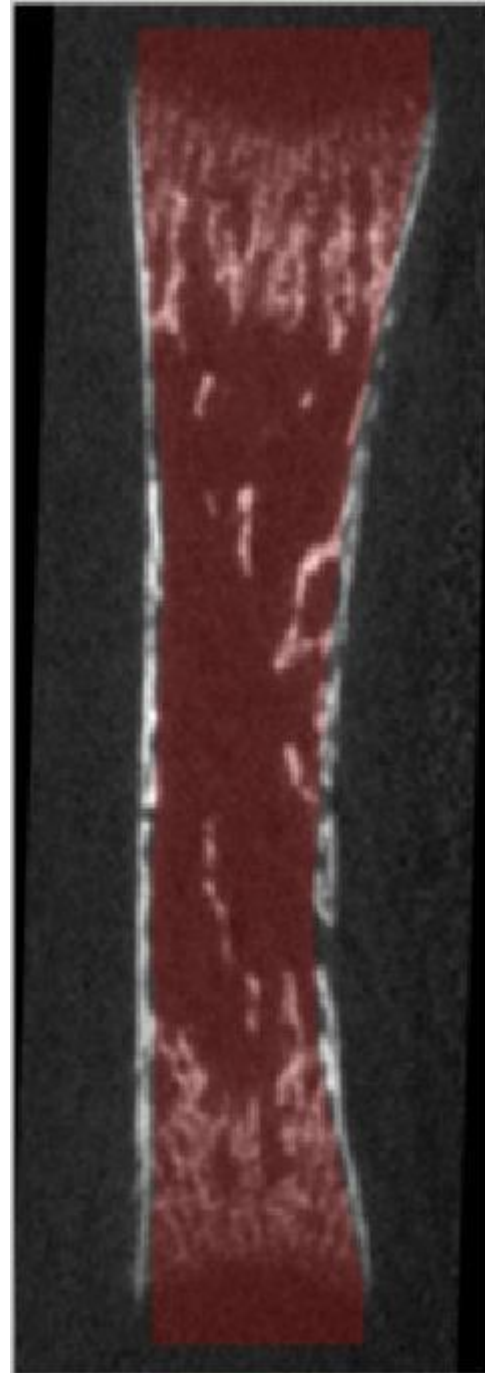

Longitudinal 2

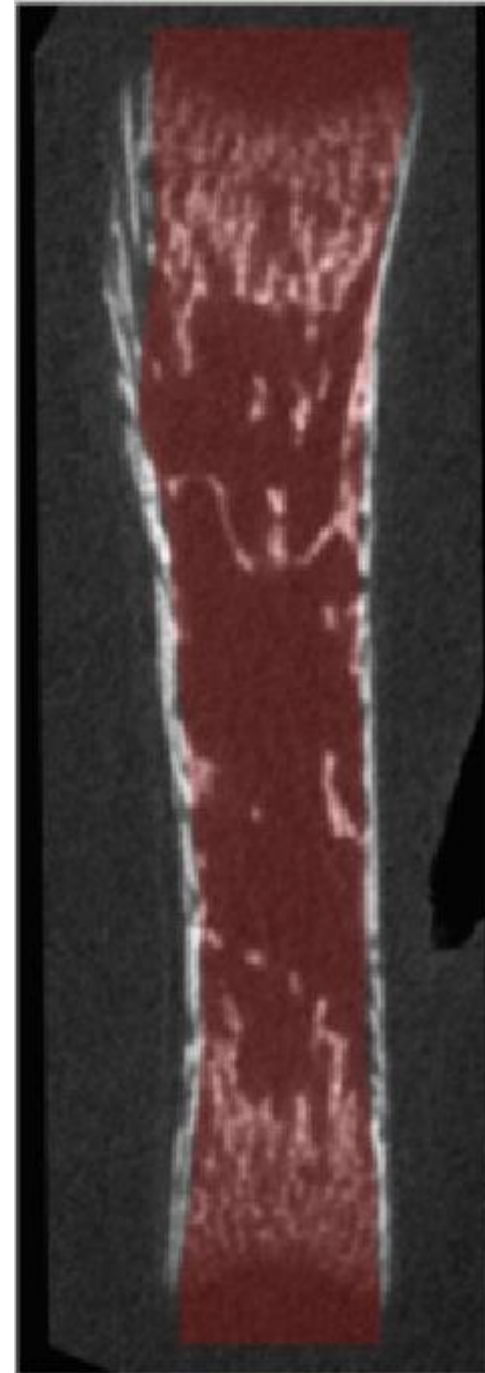

Tibia – P2

Gray scale = Bone CT slide

Semi-transparent red = Masked regions

Transverse 1

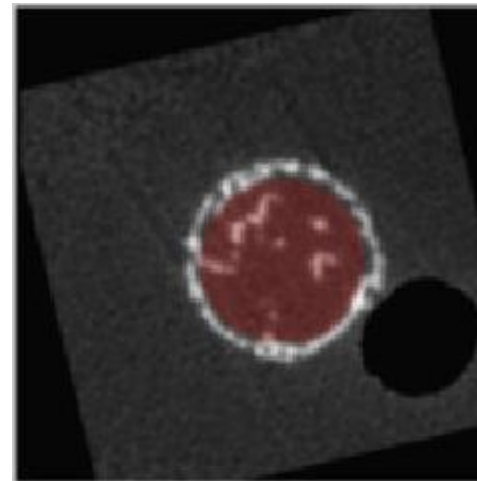

Transverse 2

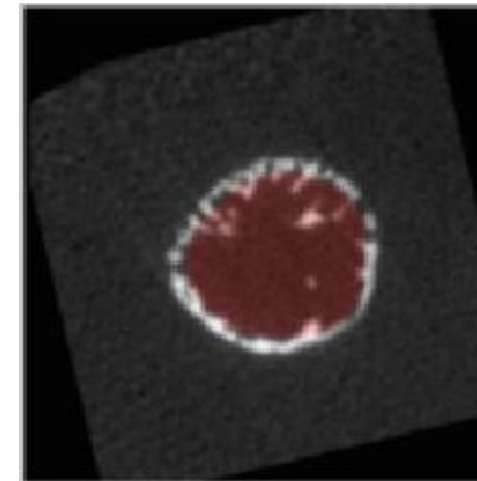

Transverse 3

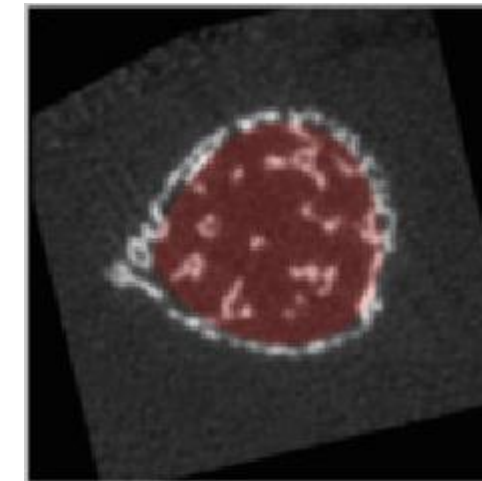

Longitudinal 1

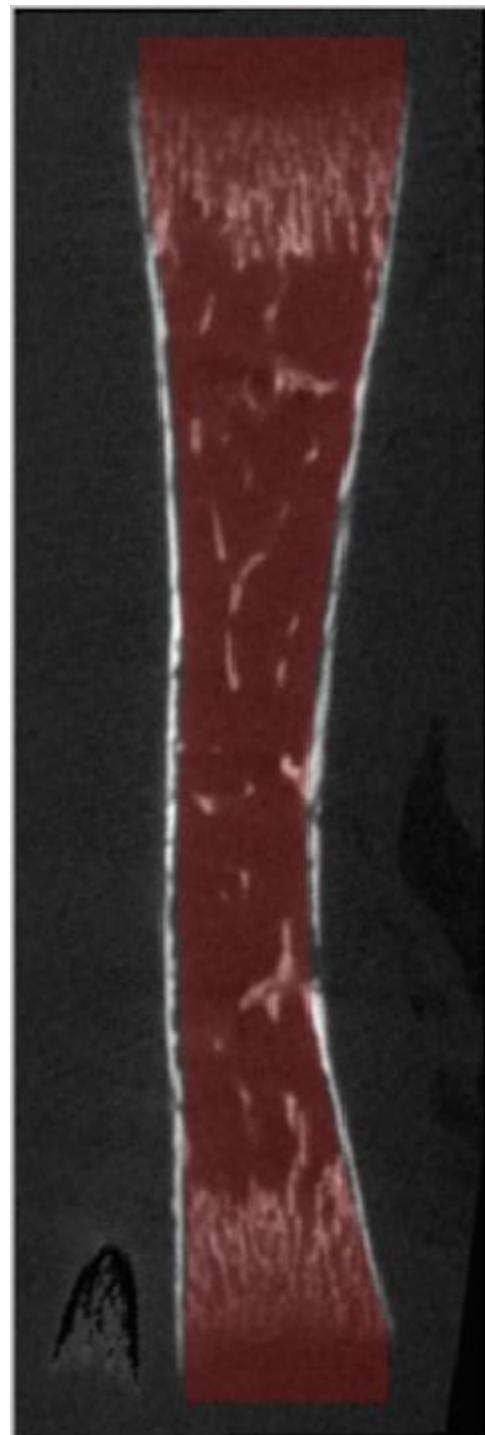

Longitudinal 2

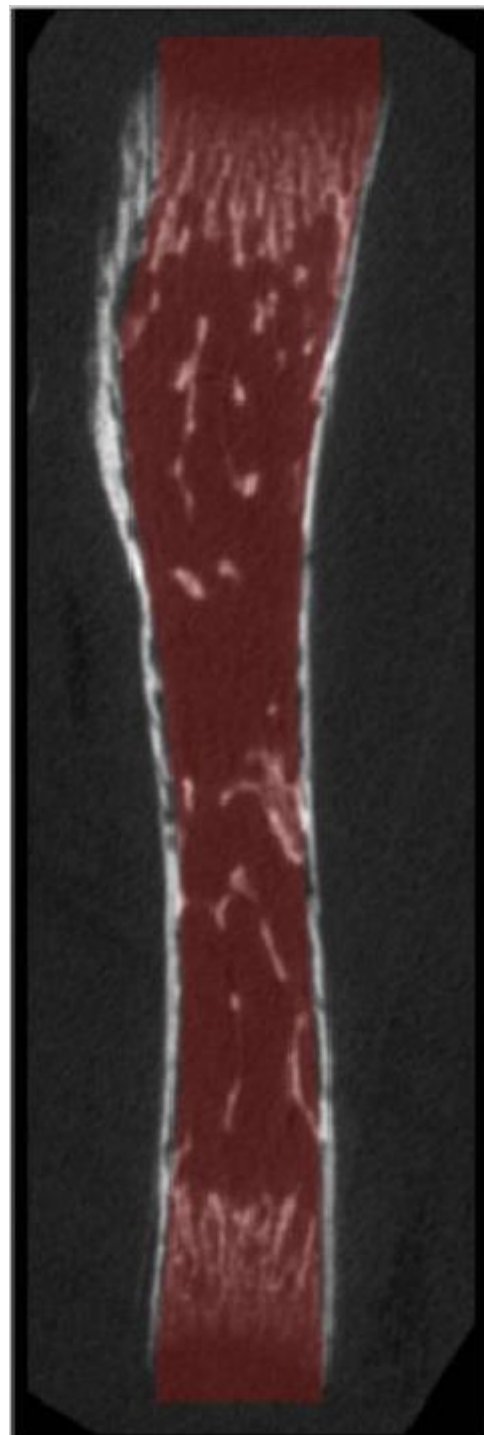

Tibia - P4

Gray scale = Bone CT slide

Semi-transparent red = Masked regions

Transverse 1

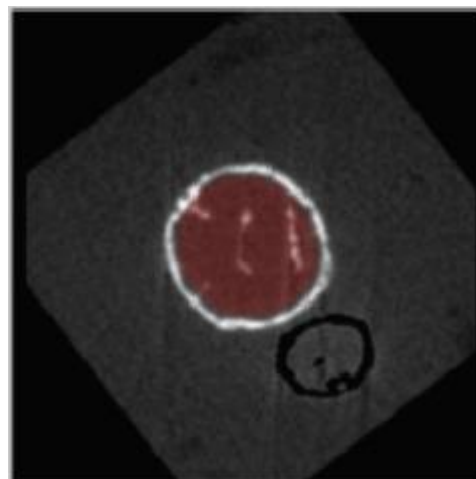

Transverse 2

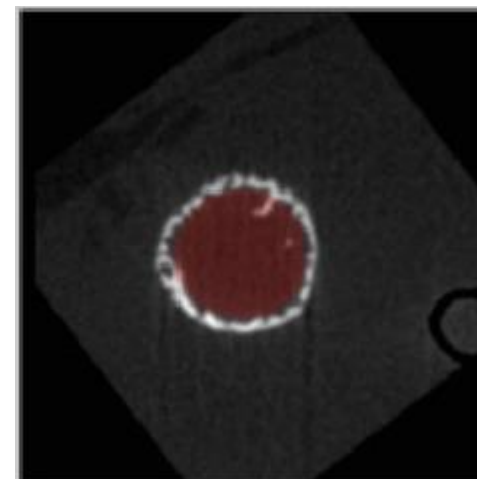

Transverse 3

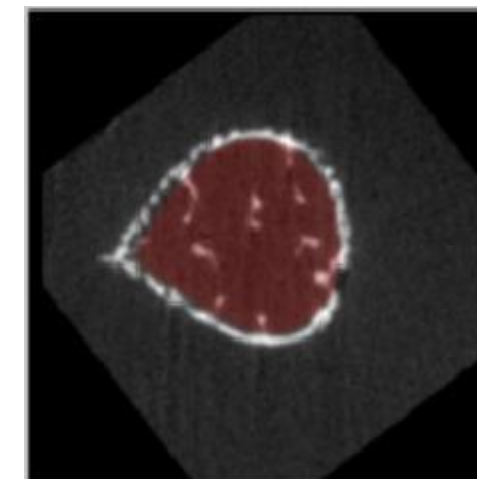

Longitudinal 1

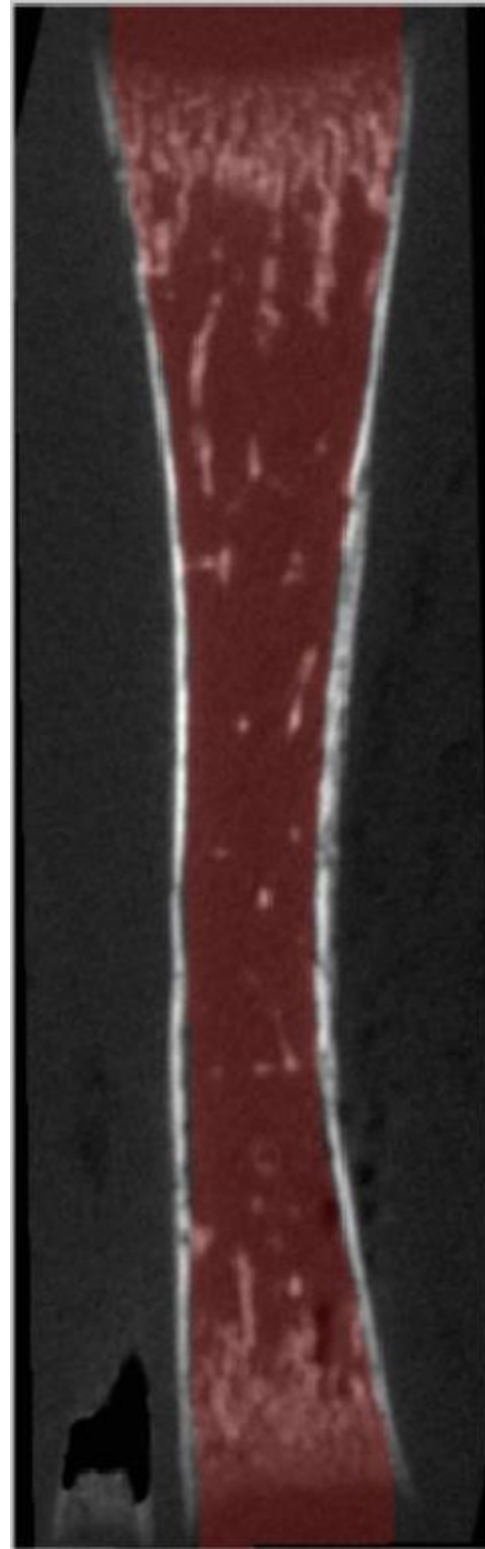

Longitudinal 2

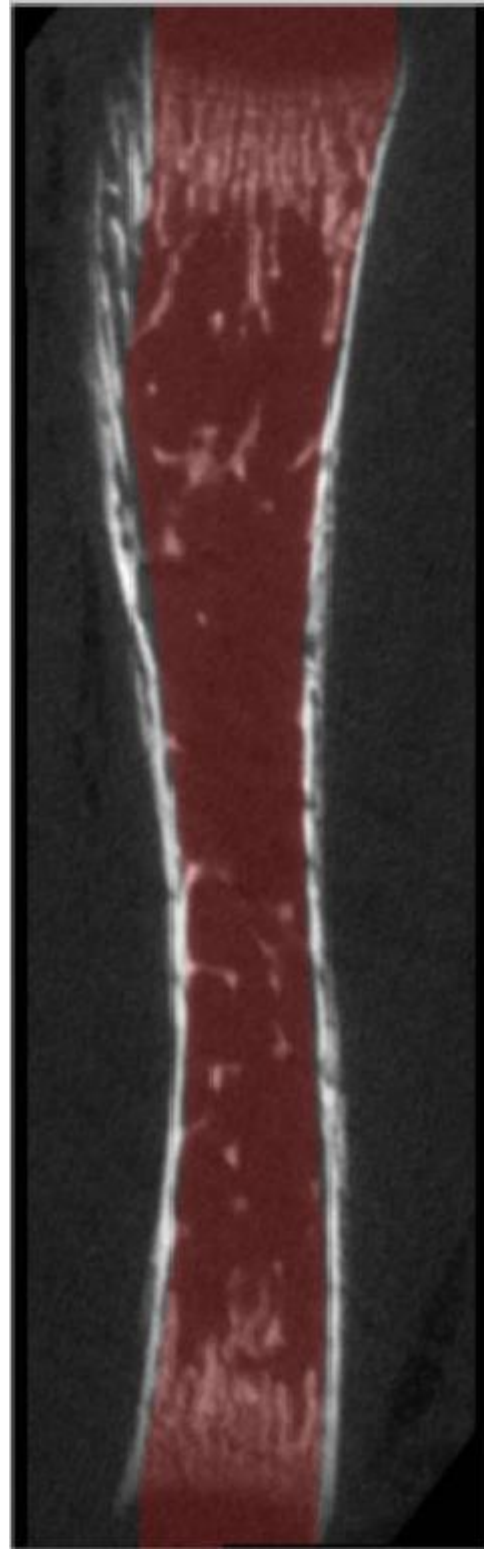

Tibia – P6

Gray scale = Bone CT slide

Semi-transparent red = Masked regions

Transverse 1

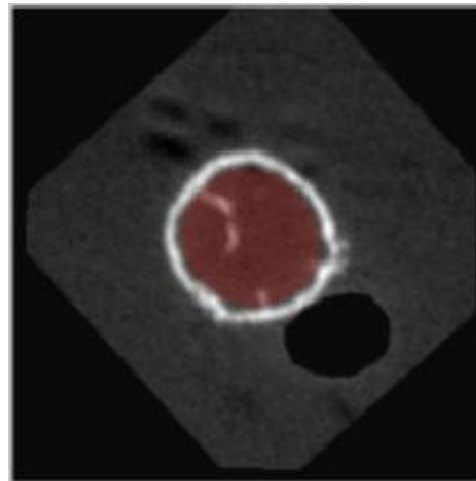

Transverse 2

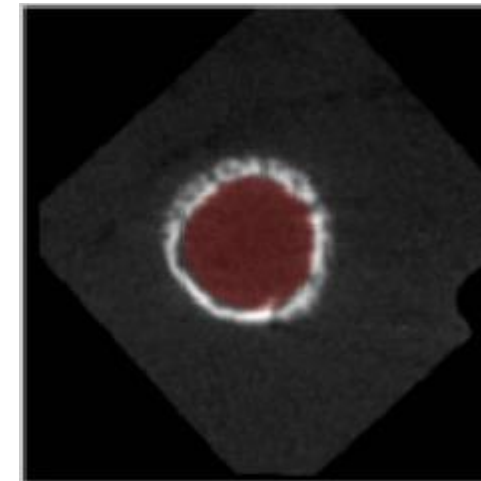

Transverse 3

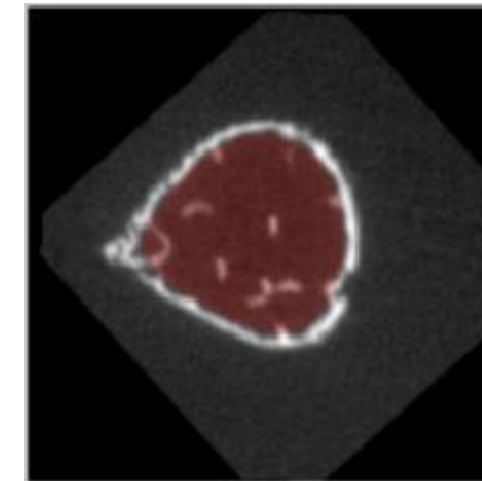

Longitudinal 1

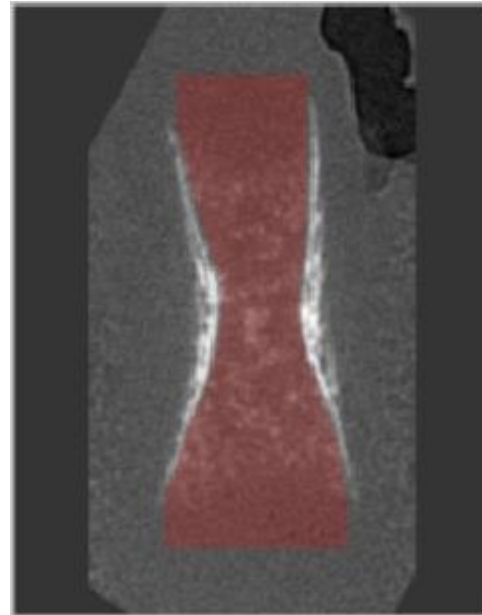

Longitudinal 2

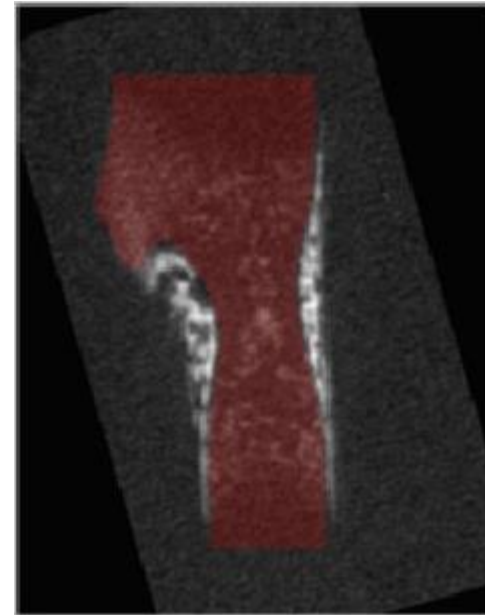

Transverse 1

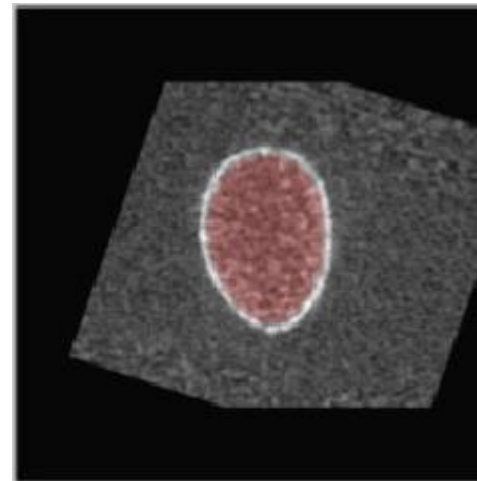

Transverse 2

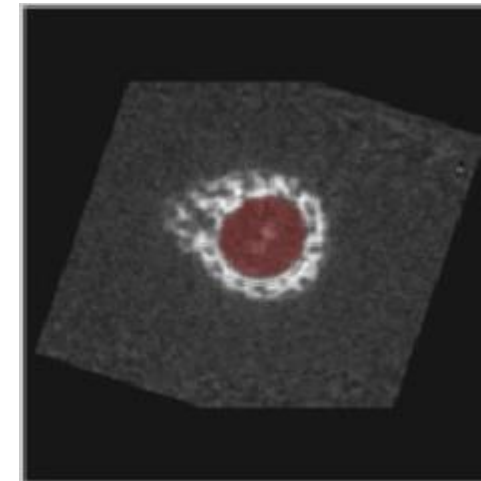

Transverse 3

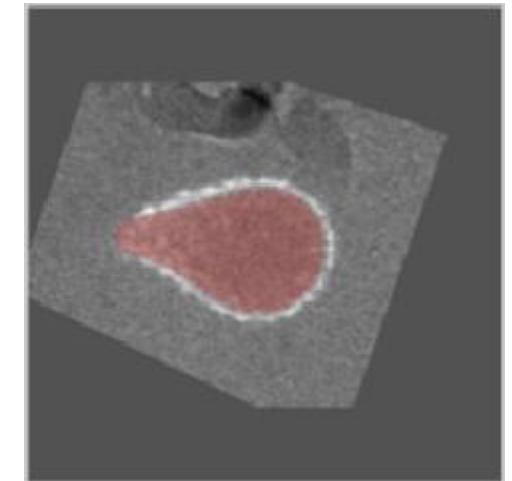

Humerus – E16

Gray scale = Bone CT slide

Semi-transparent red = Masked regions



Longitudinal 1

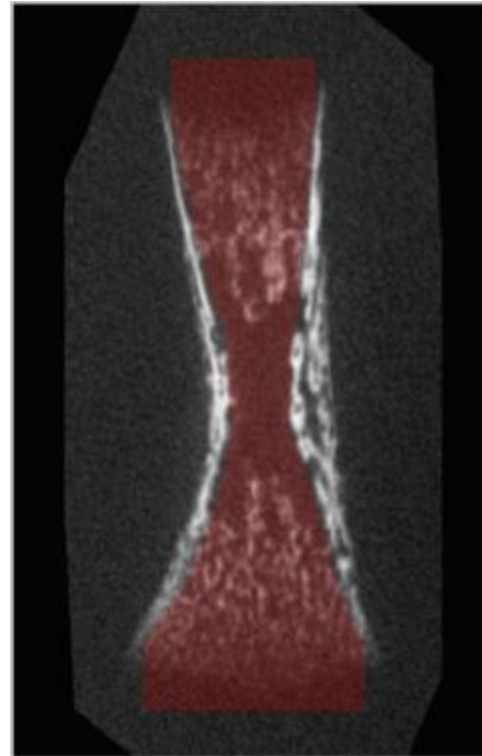

Longitudinal 2

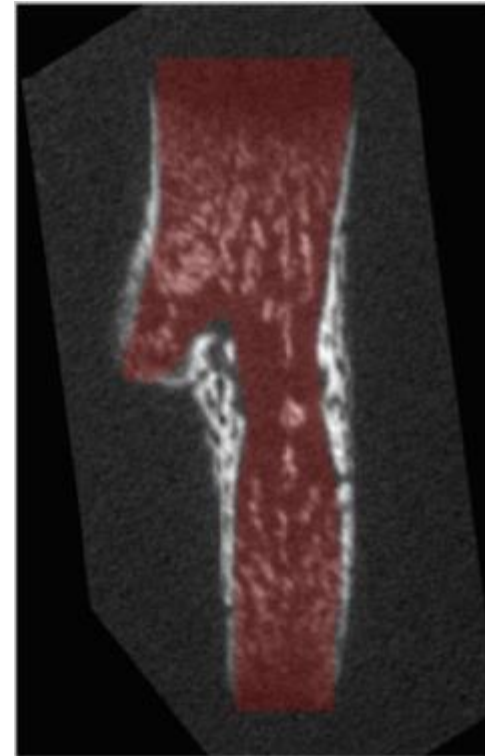

Transverse 1

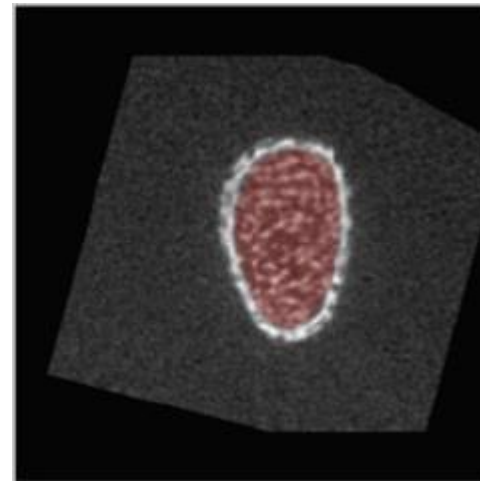

Transverse 2

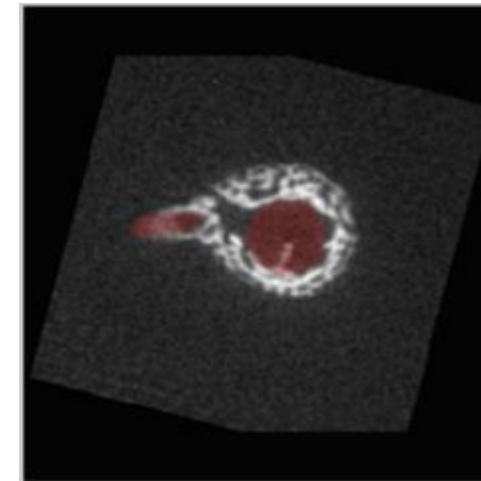

Transverse 3

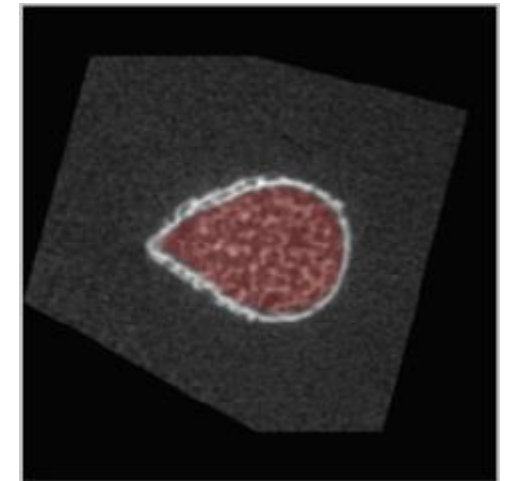

Humerus – E17

Gray scale = Bone CT slide

Semi-transparent red = Masked regions

Longitudinal 1

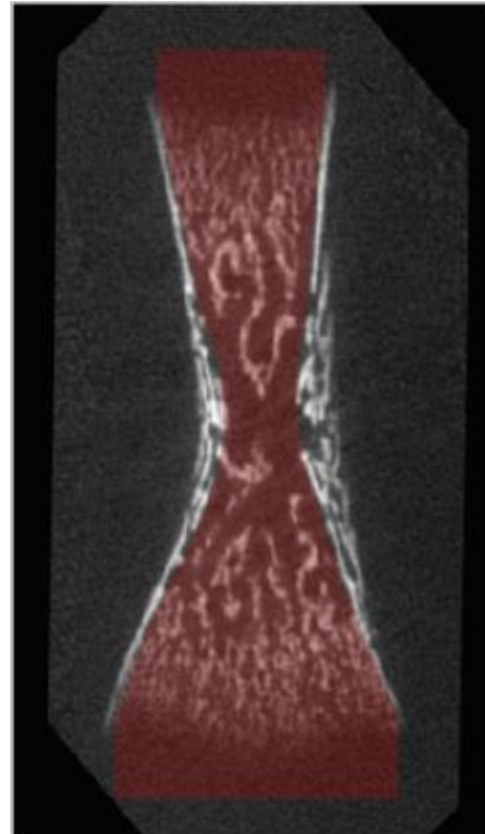

Longitudinal 2

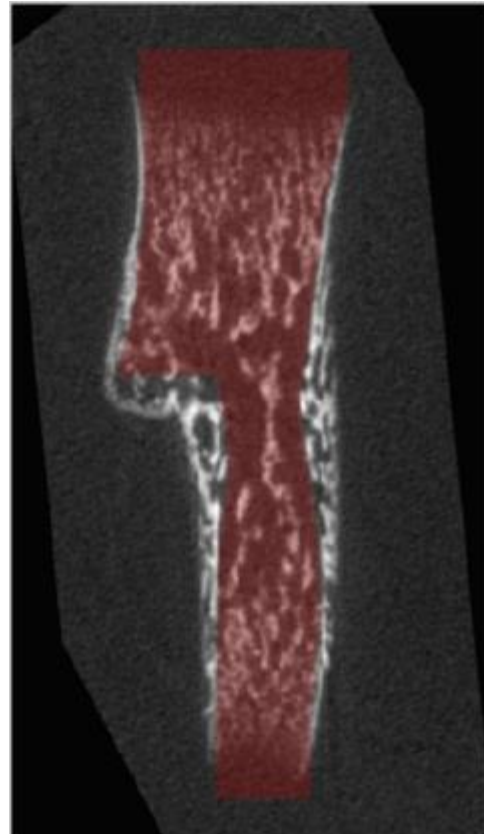

Transverse 1

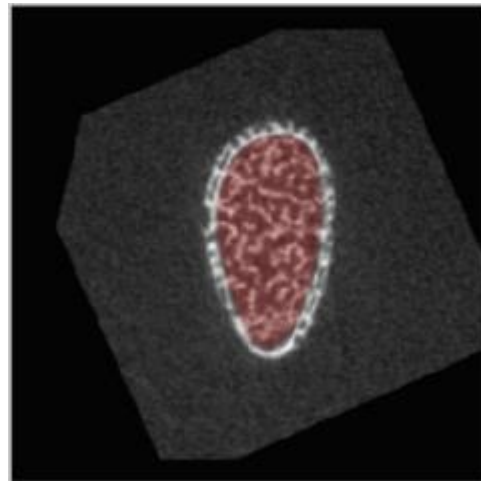

Humerus – E18

Gray scale = Bone CT slide

Semi-transparent red = Masked regions

Transverse 2

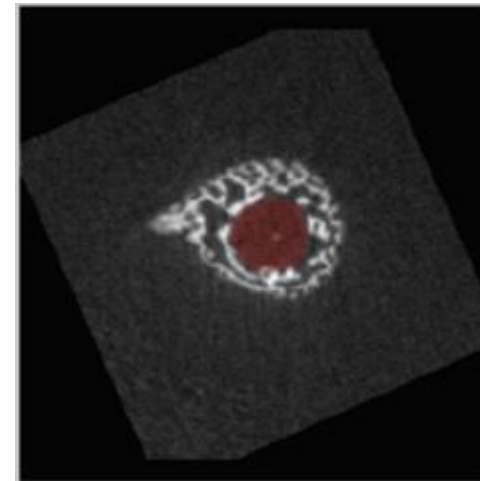

Transverse 3

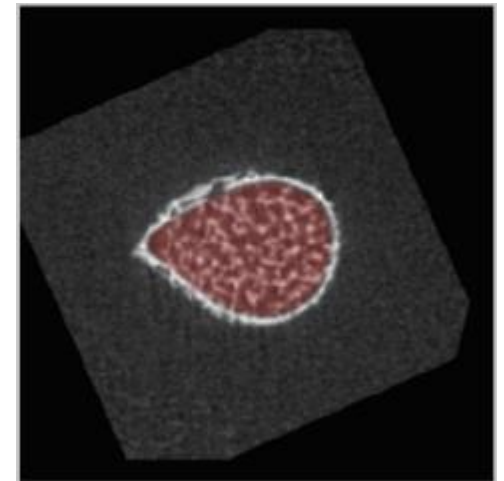

Longitudinal 1

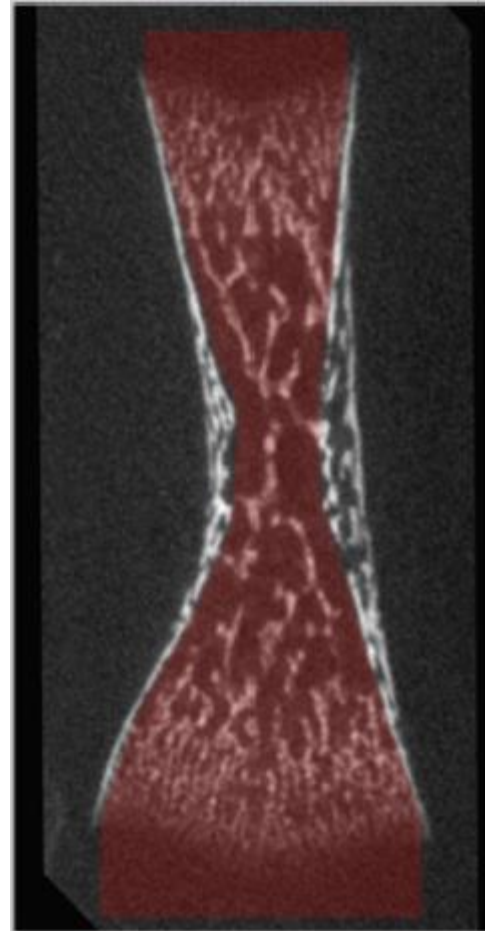

Longitudinal 2

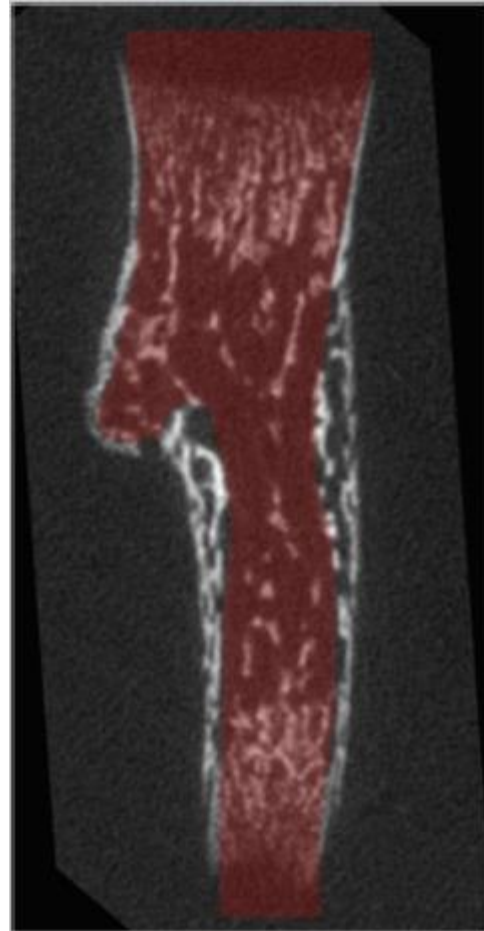

Transverse 1

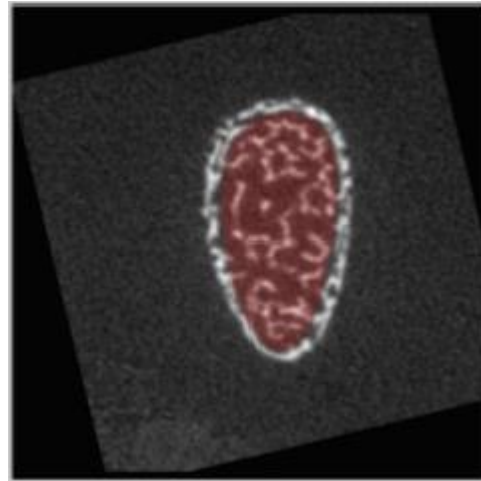

Humerus – P1

Gray scale = Bone CT slide

Semi-transparent red = Masked regions

Transverse 2

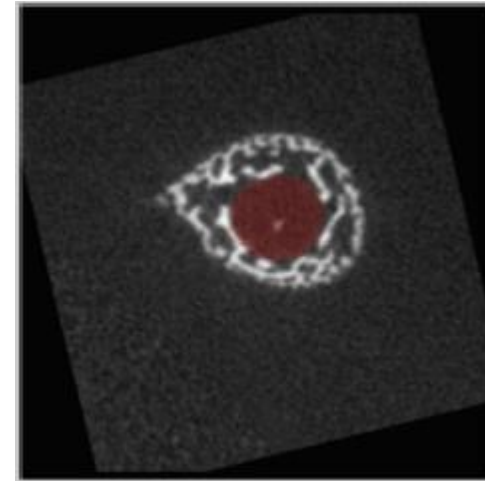

Transverse 3

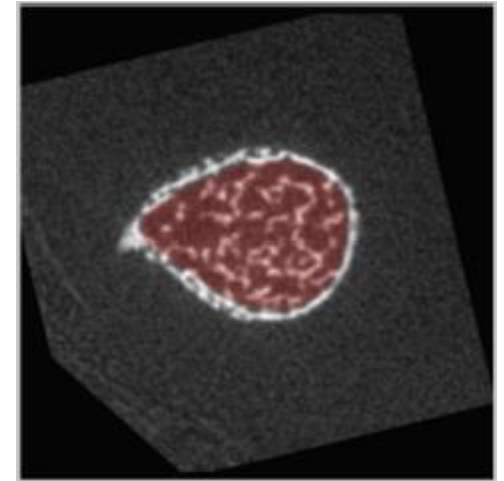

Longitudinal 1

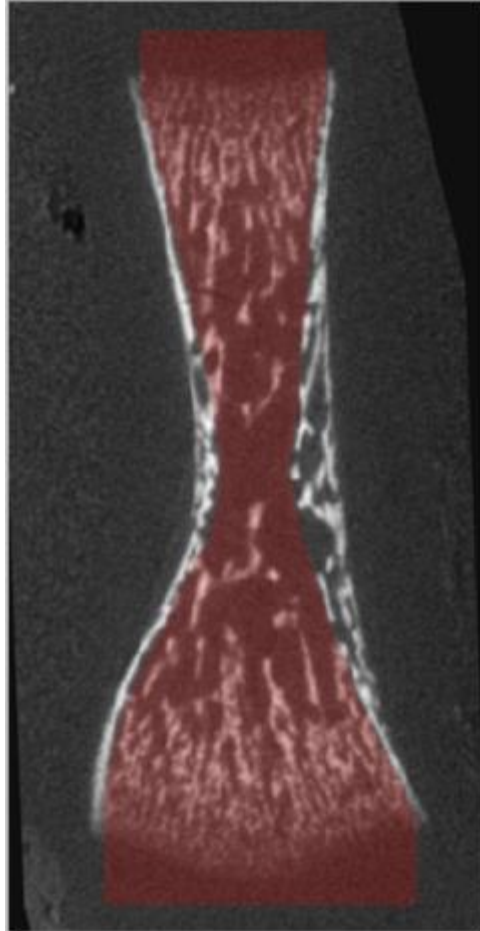

Longitudinal 2

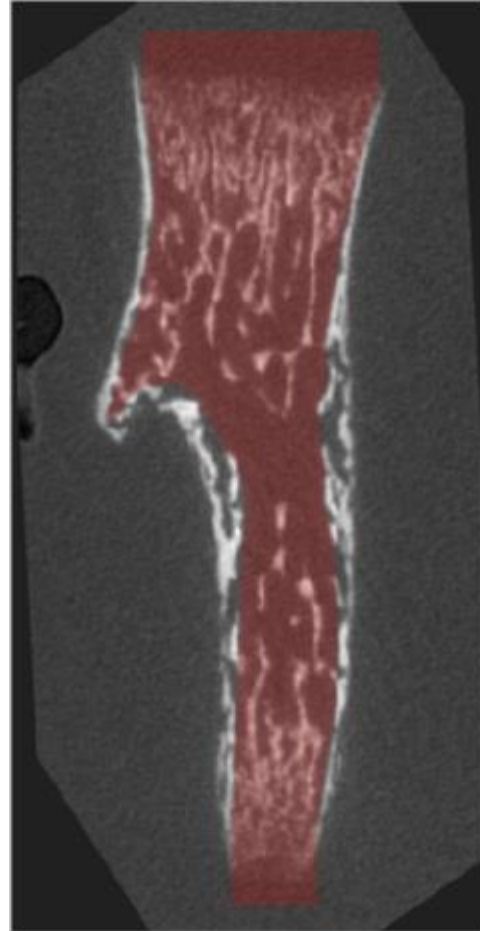

Transverse 1

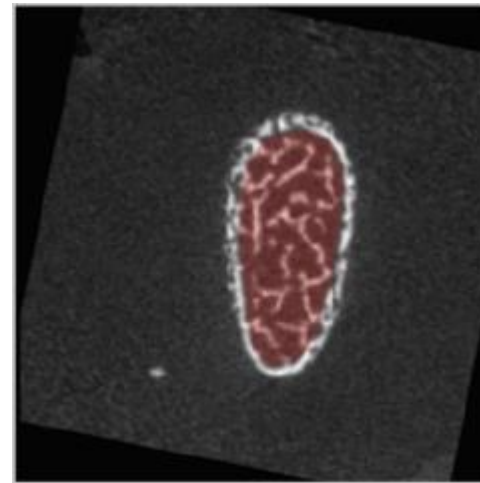

Humerus – P2

Gray scale = Bone CT slide

Semi-transparent red = Masked regions

Transverse 2

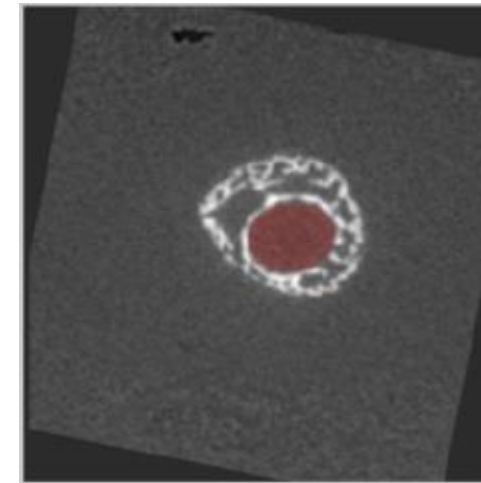

Transverse 3

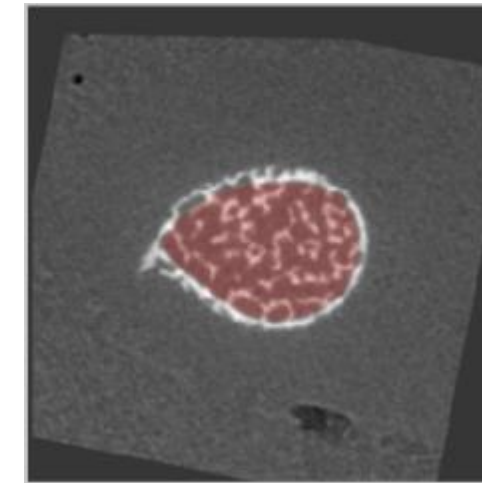

Longitudinal 1

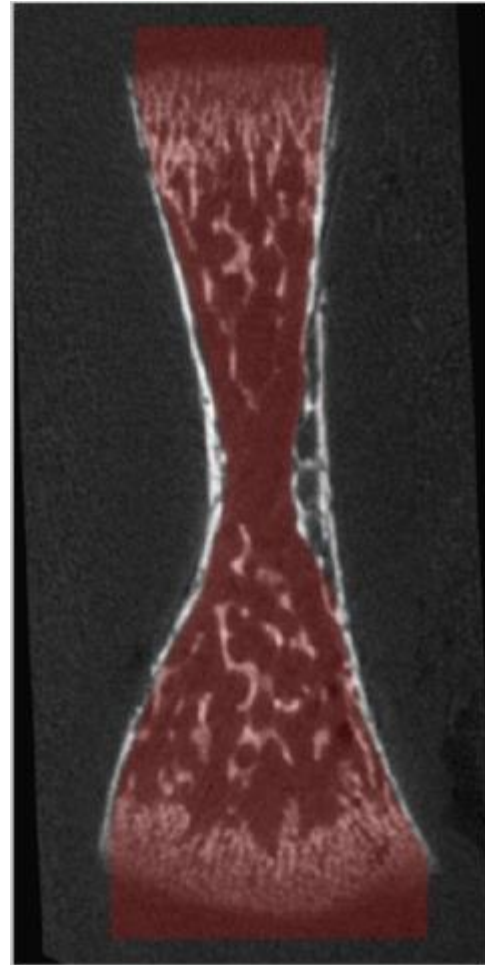

Longitudinal 2

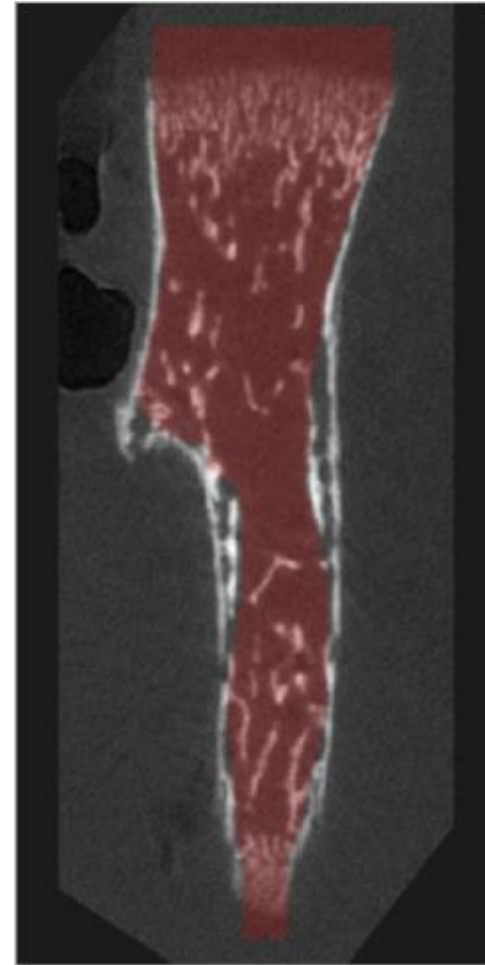

Transverse 1

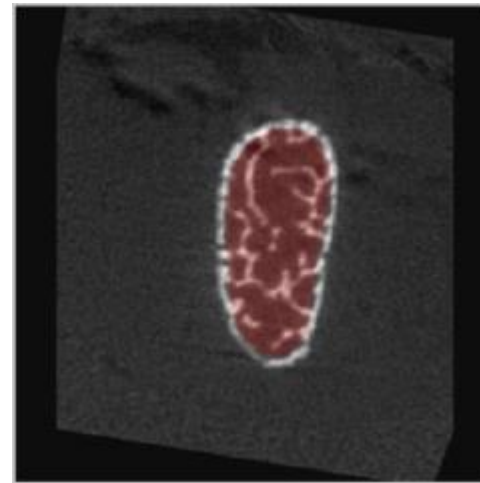

Humerus – P4

Gray scale = Bone CT slide

Semi-transparent red = Masked regions

Transverse 2

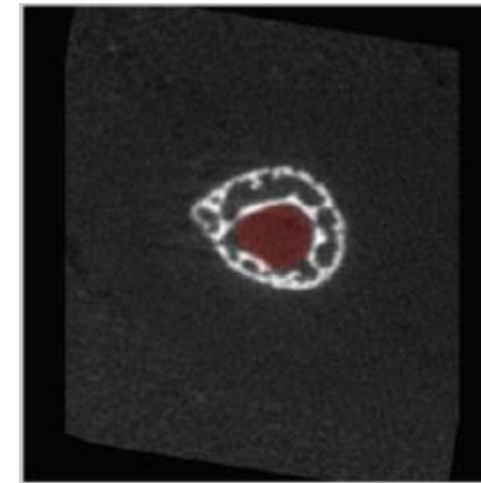

Transverse 3

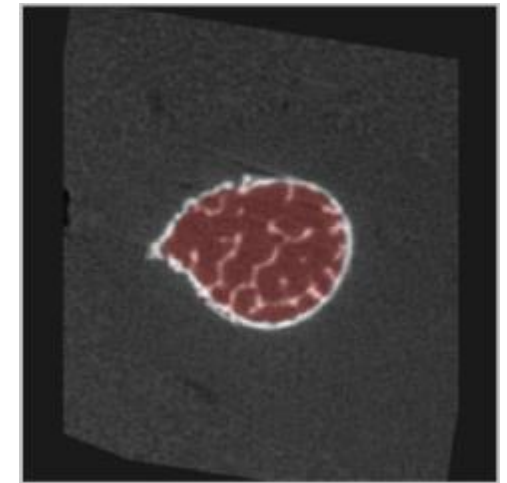

Longitudinal 1

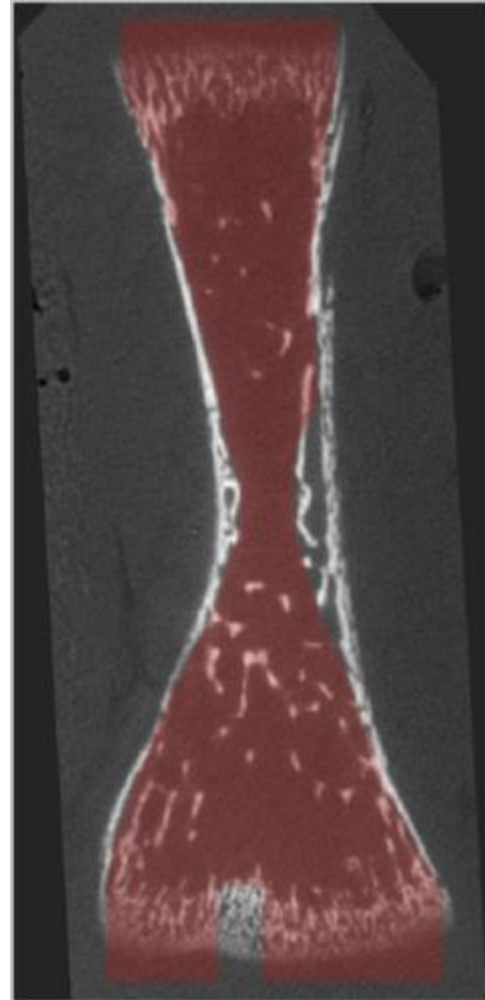

Longitudinal 2

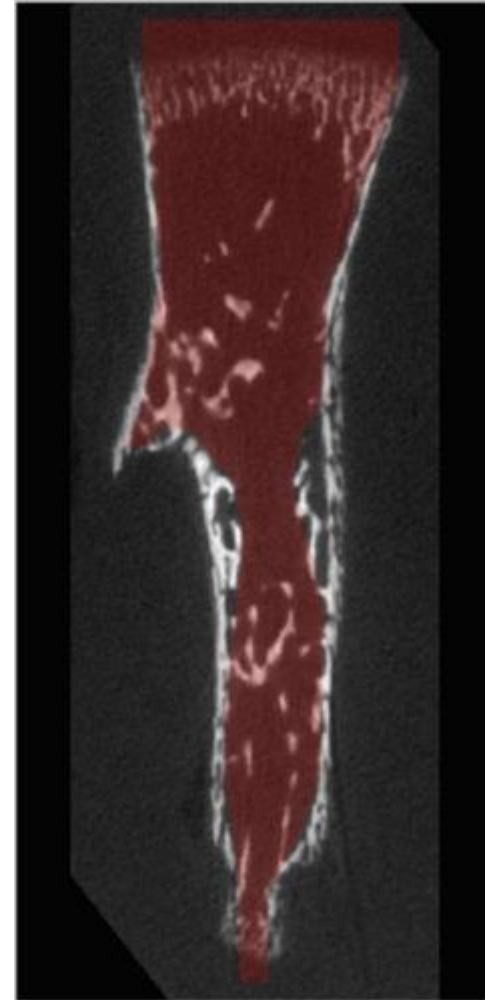

Transverse 1

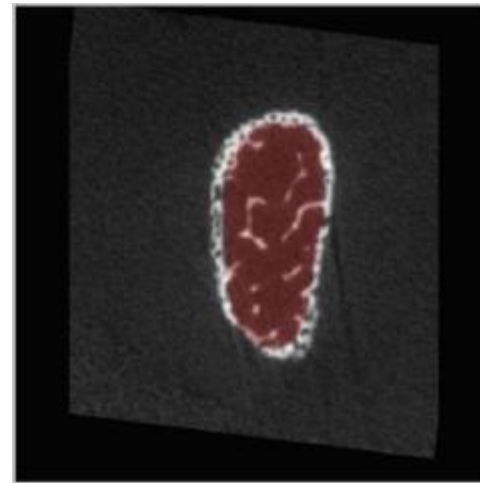

Humerus – P6  
Gray scale = Bone CT slide  
Semi-transparent red = Masked regions

Transverse 2

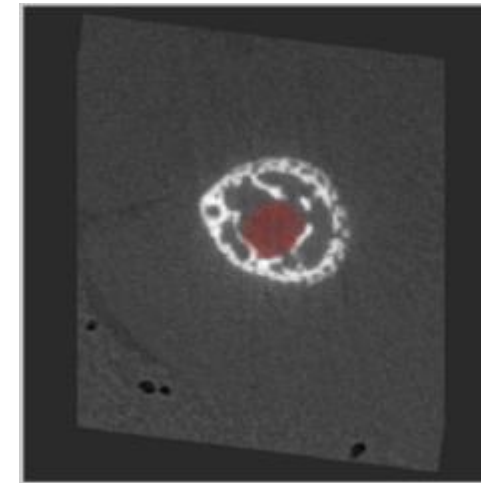

Transverse 3

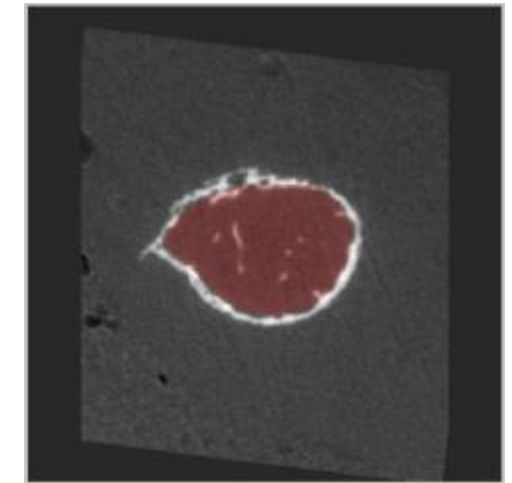

Radius – E16

Gray scale = Bone CT slide

Semi-transparent red = Masked regions

Longitudinal 1

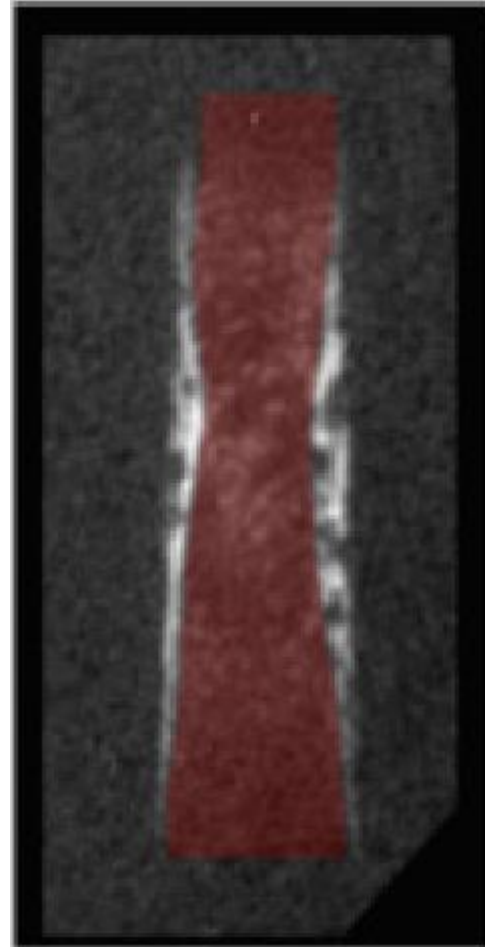

Longitudinal 2

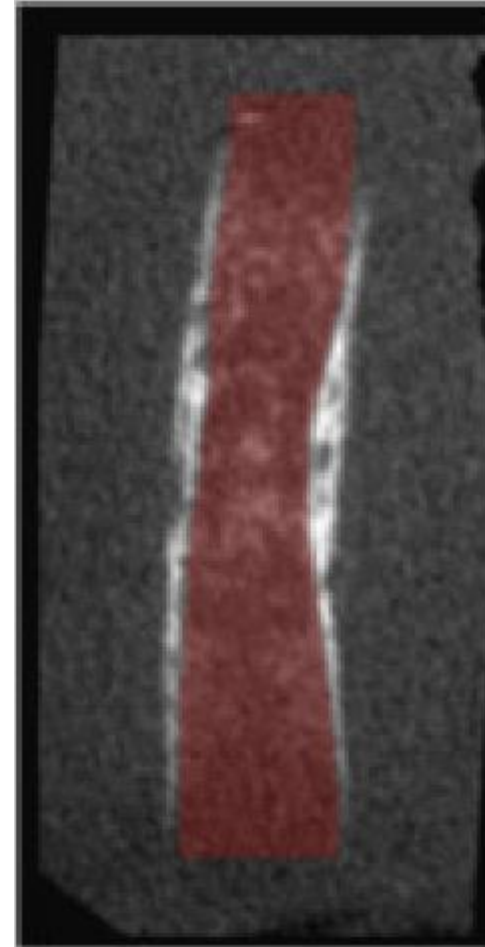

Transverse 1

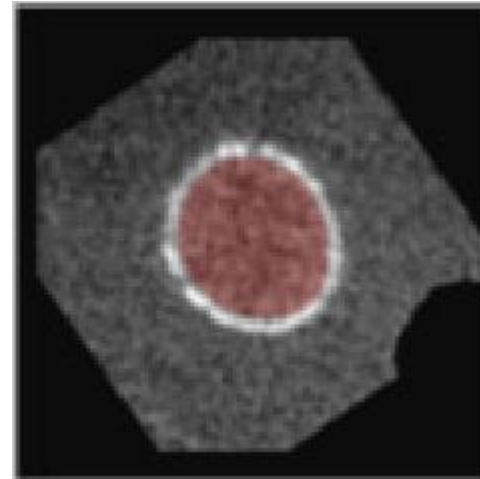

Transverse 2

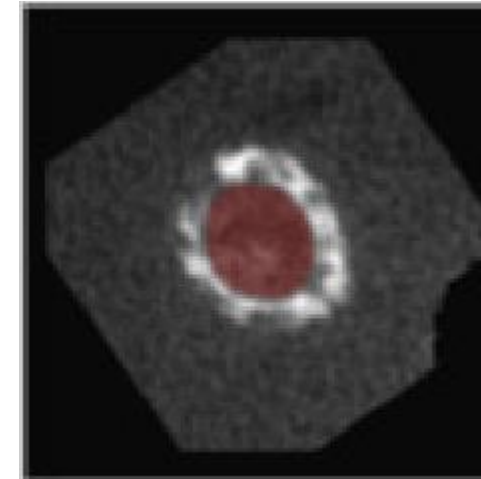

Transverse 3

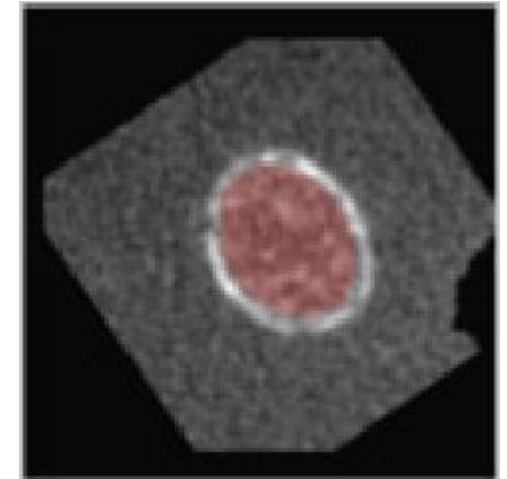

Longitudinal 1

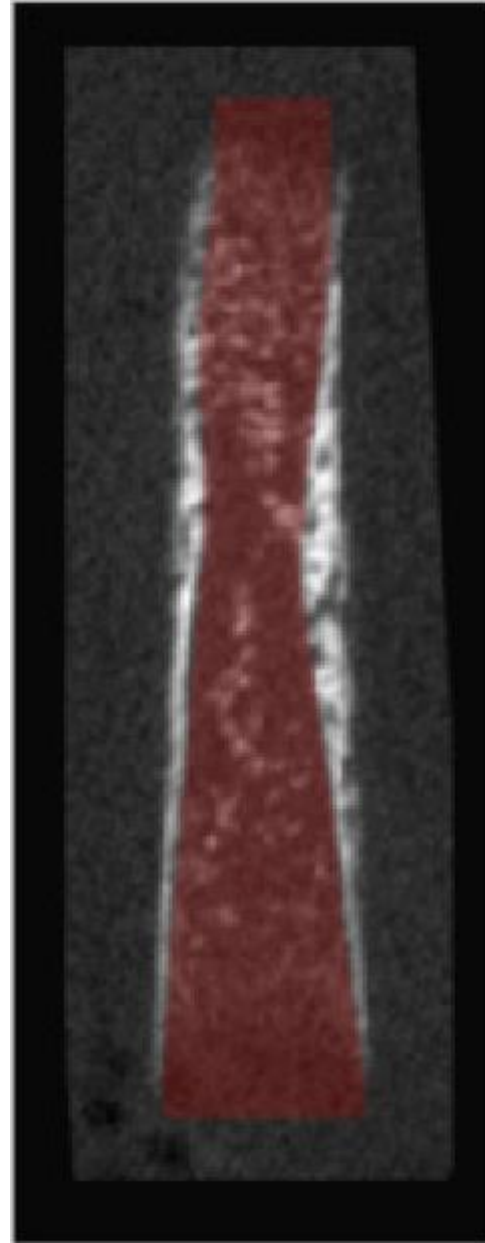

Longitudinal 2

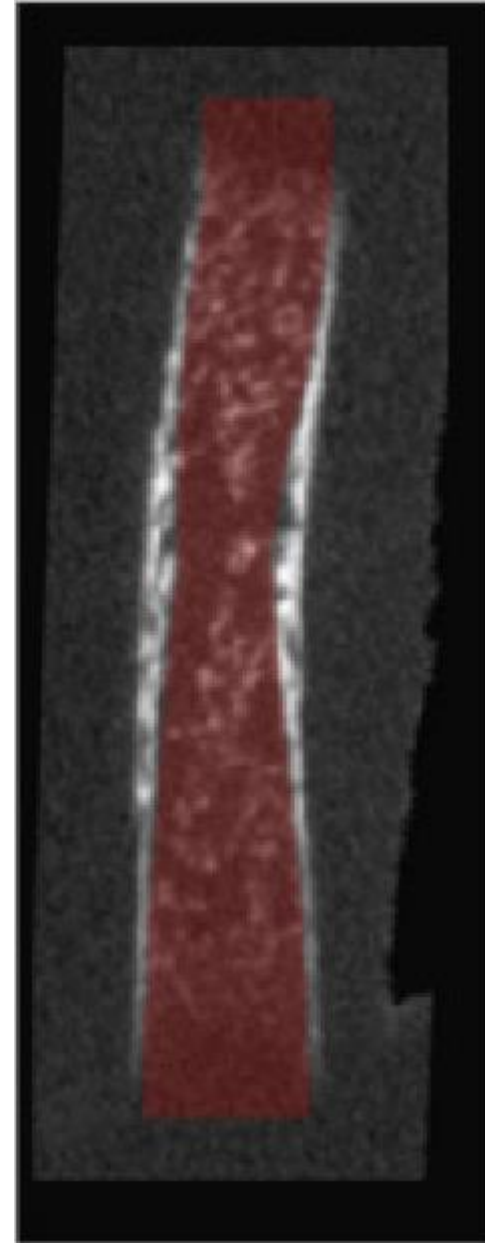

Radius – E17

Gray scale = Bone CT slide

Semi-transparent red = Masked regions

Transverse 1

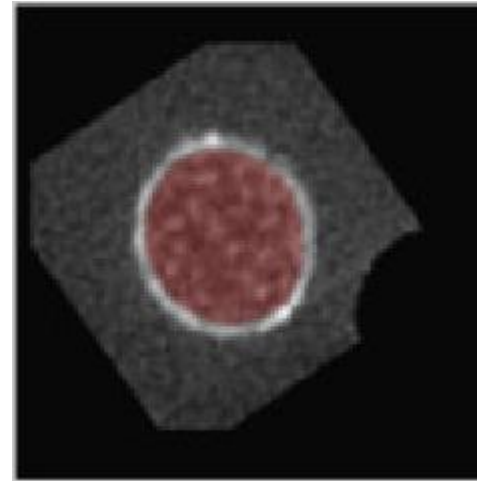

Transverse 2

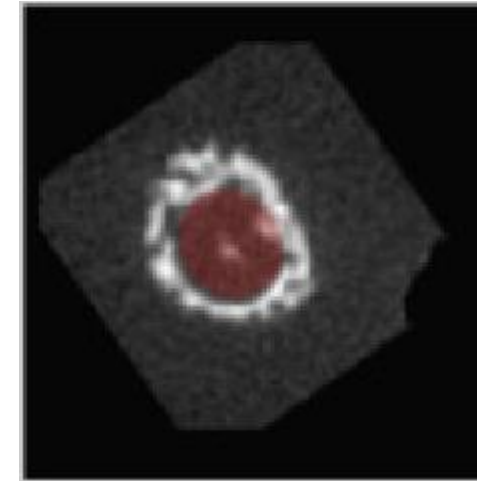

Transverse 3

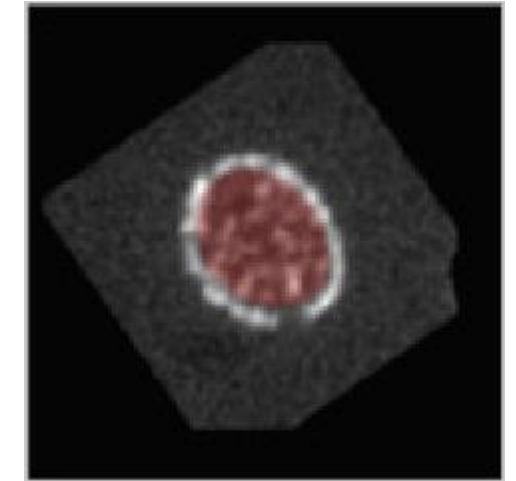



Longitudinal 1

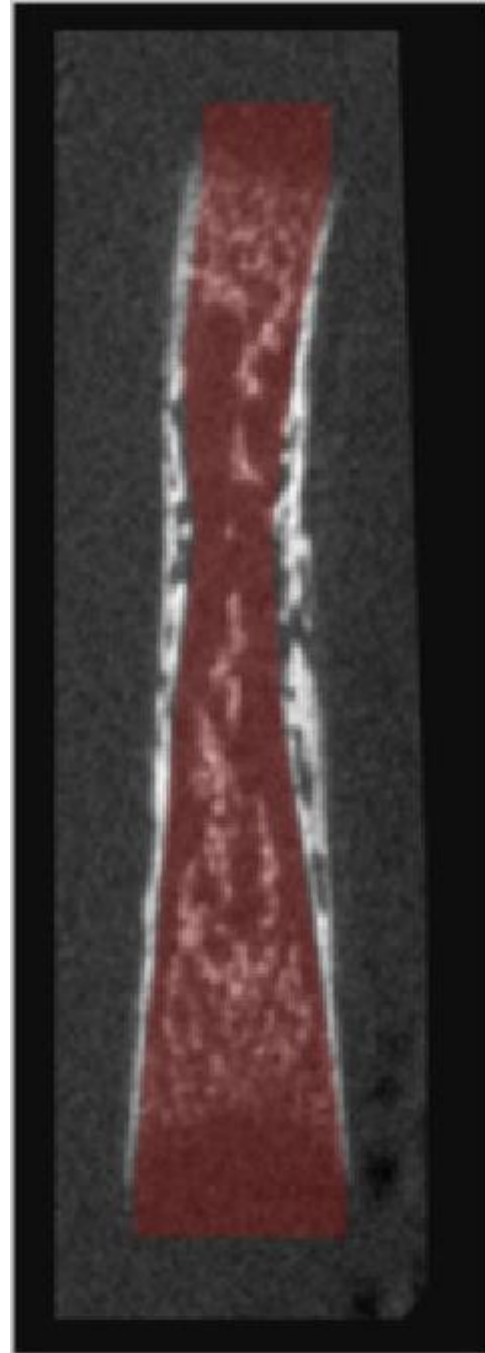

Longitudinal 2

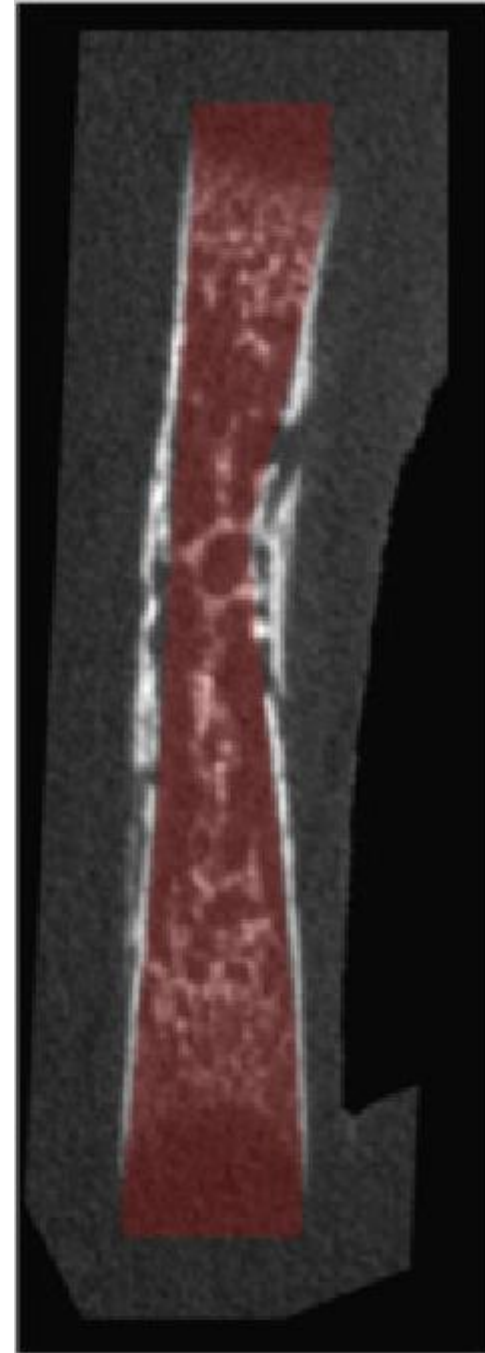

Radius – E18  
Gray scale = Bone CT slide  
Semi-transparent red = Masked regions

Transverse 1

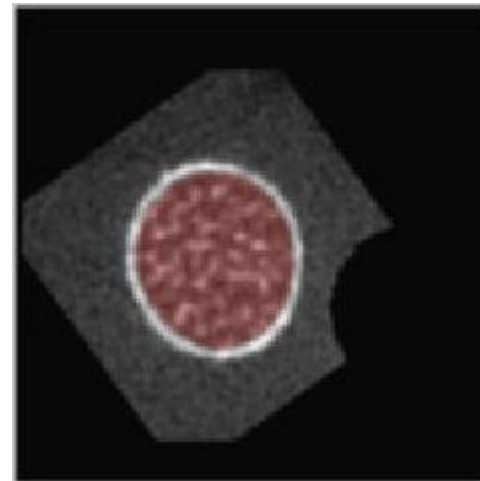

Transverse 2

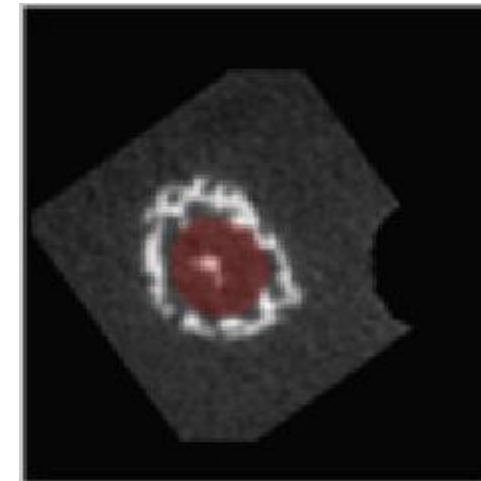

Transverse 3

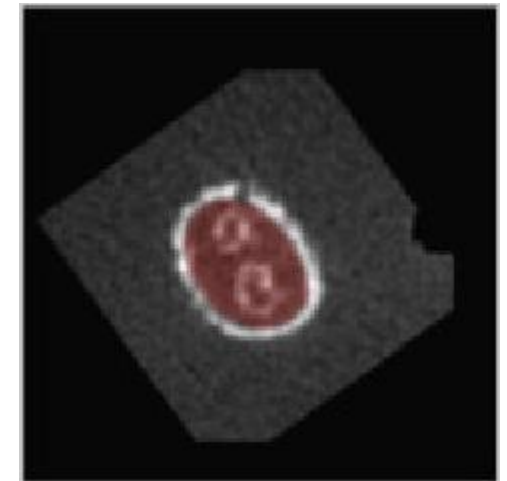

Longitudinal 1

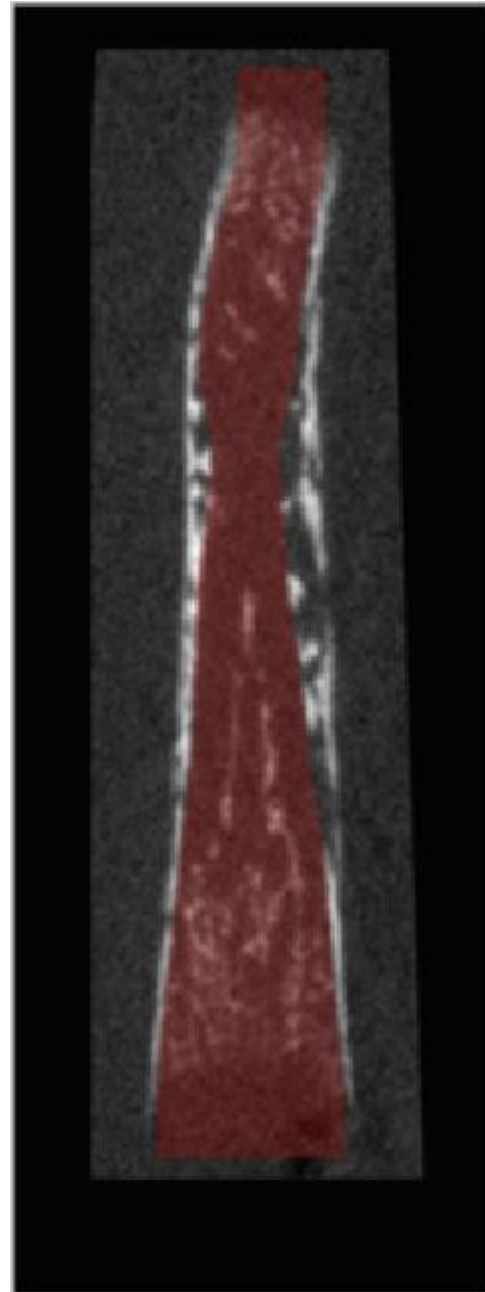

Longitudinal 2

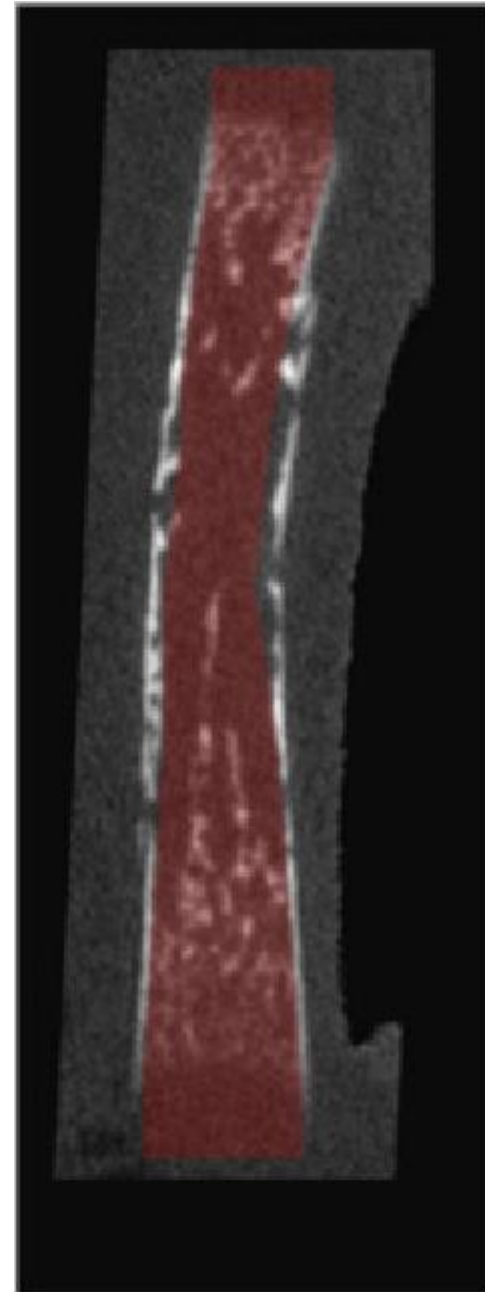

Transverse 1

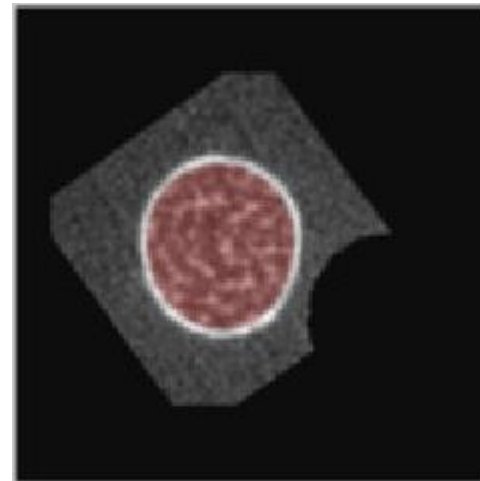

Transverse 2

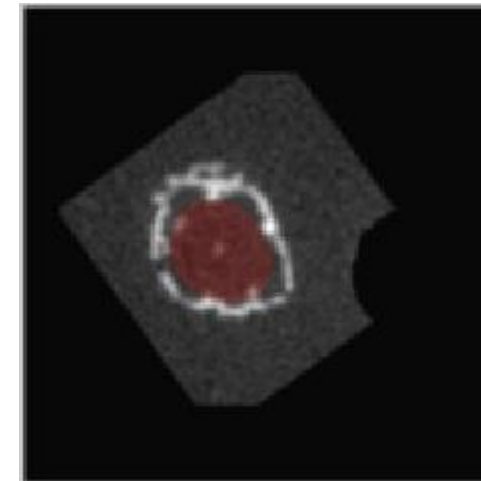

Transverse 3

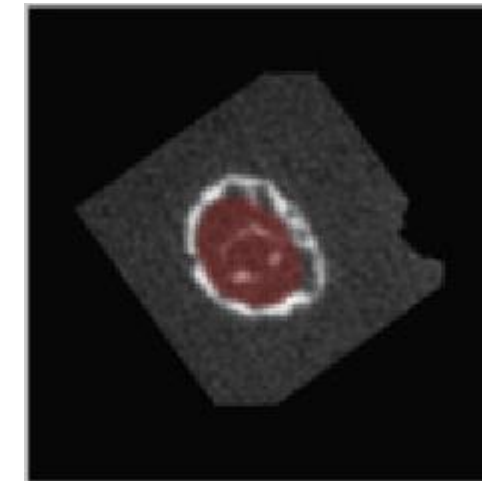

Radius - P1  
Gray scale = Bone CT slide  
Semi-transparent red = Masked regions

Longitudinal 1

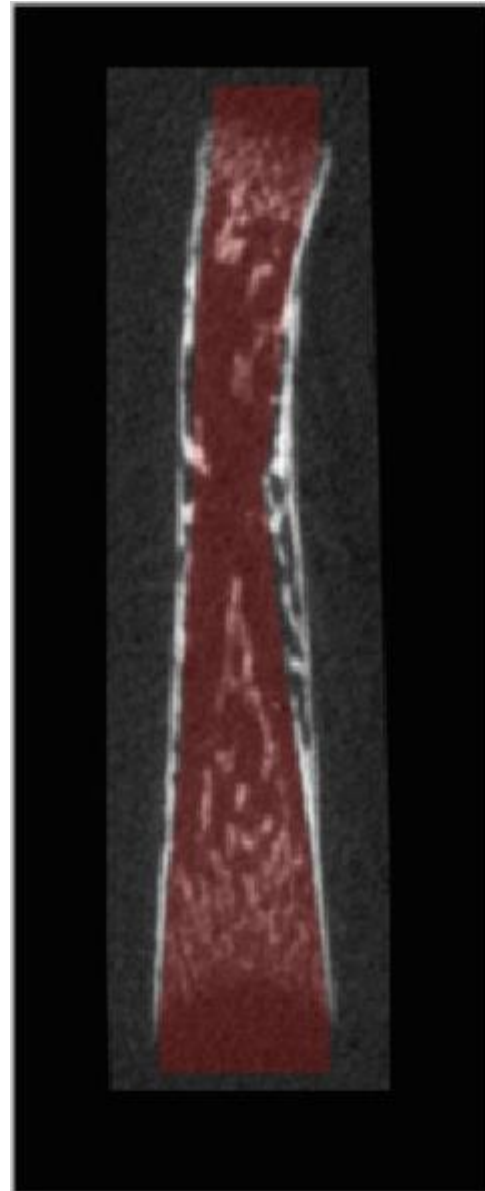

Longitudinal 2

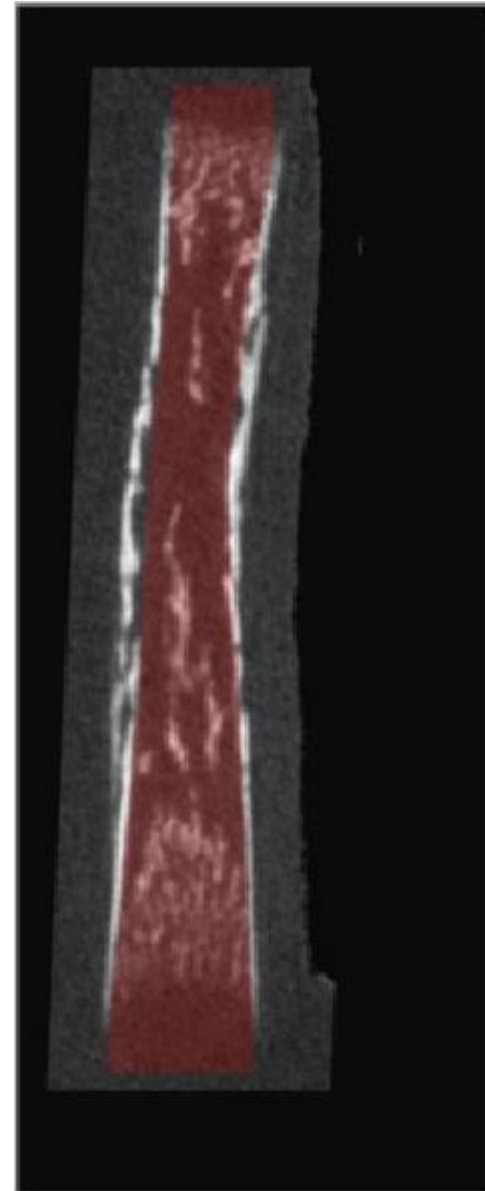

Transverse 1

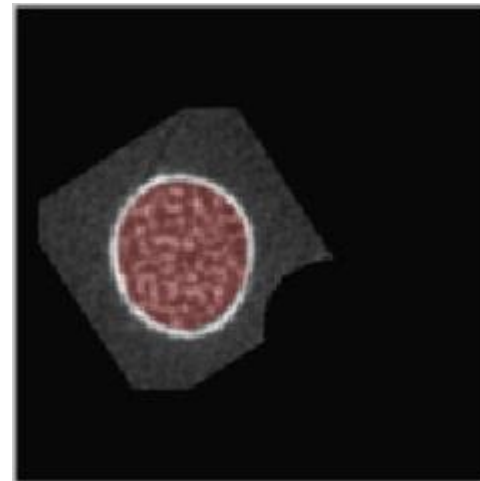

Transverse 2

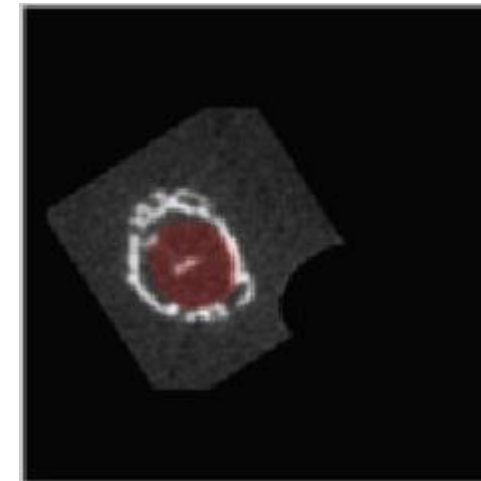

Transverse 3

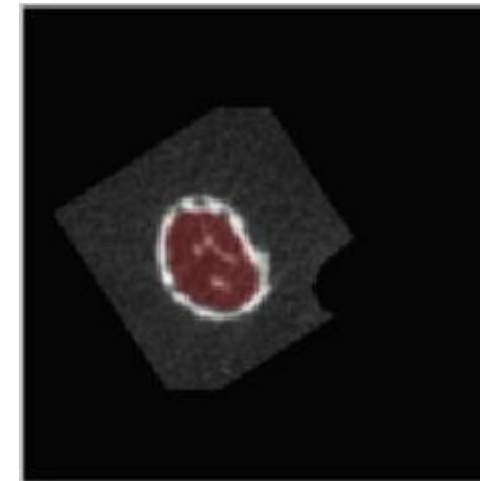

Radius - P2  
Gray scale = Bone CT slide  
Semi-transparent red = Masked regions

Longitudinal 1

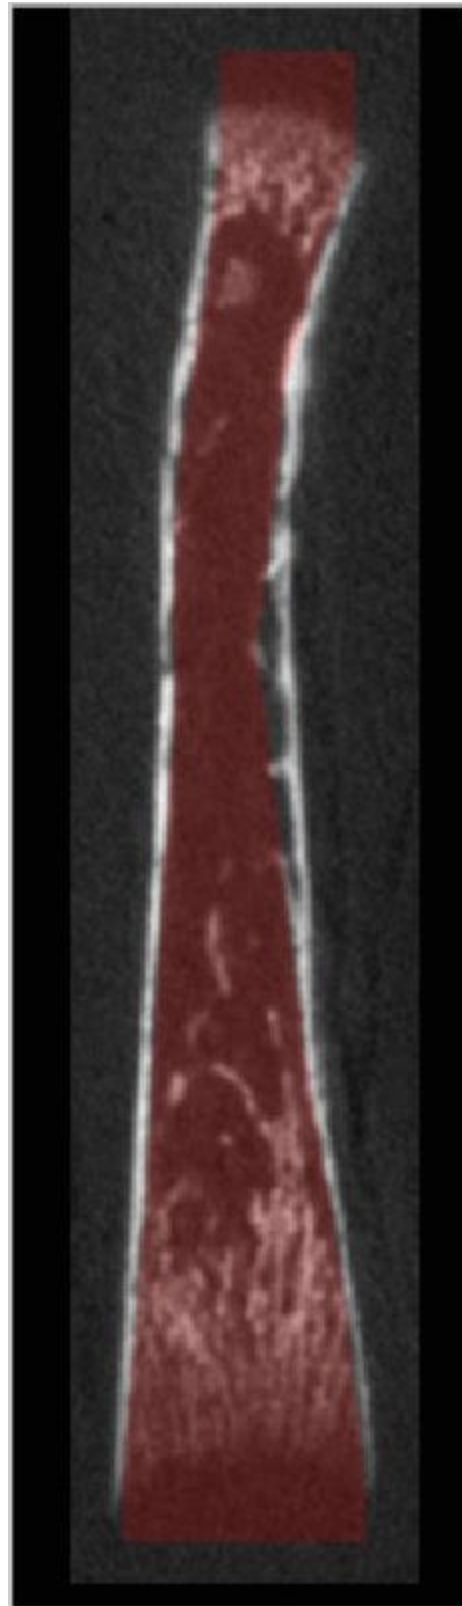

Longitudinal 2

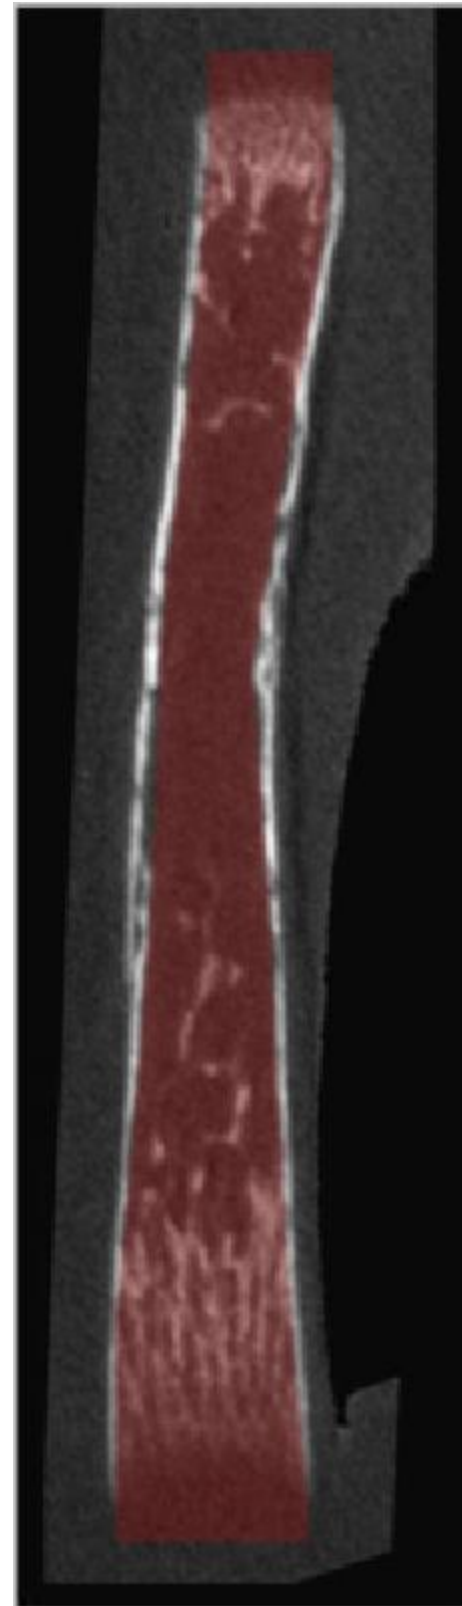

Radius - P4  
Gray scale = Bone CT slide  
Semi-transparent red = Masked regions

Transverse 1

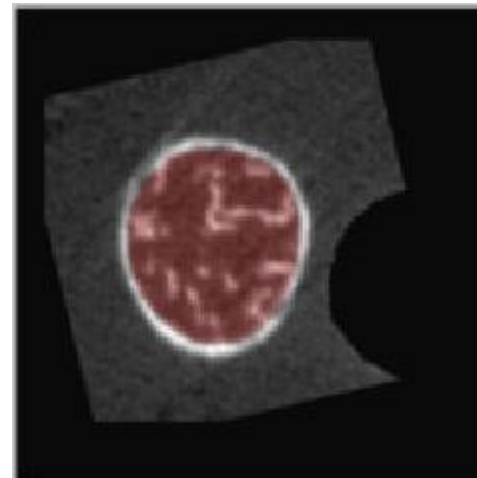

Transverse 2

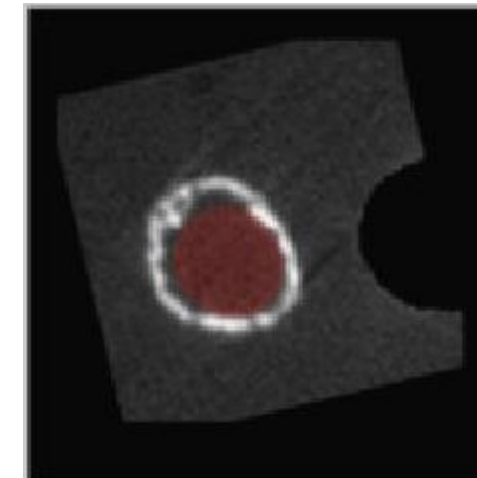

Transverse 3

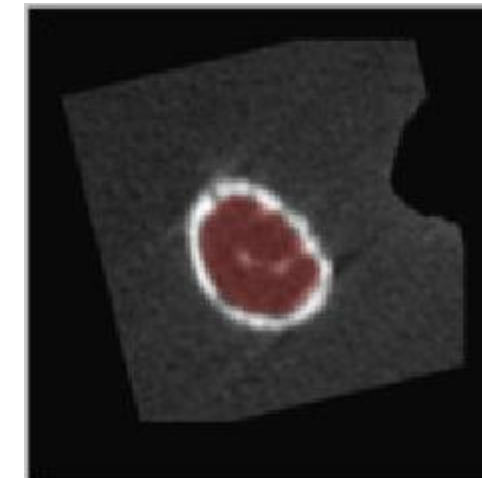

Longitudinal 1

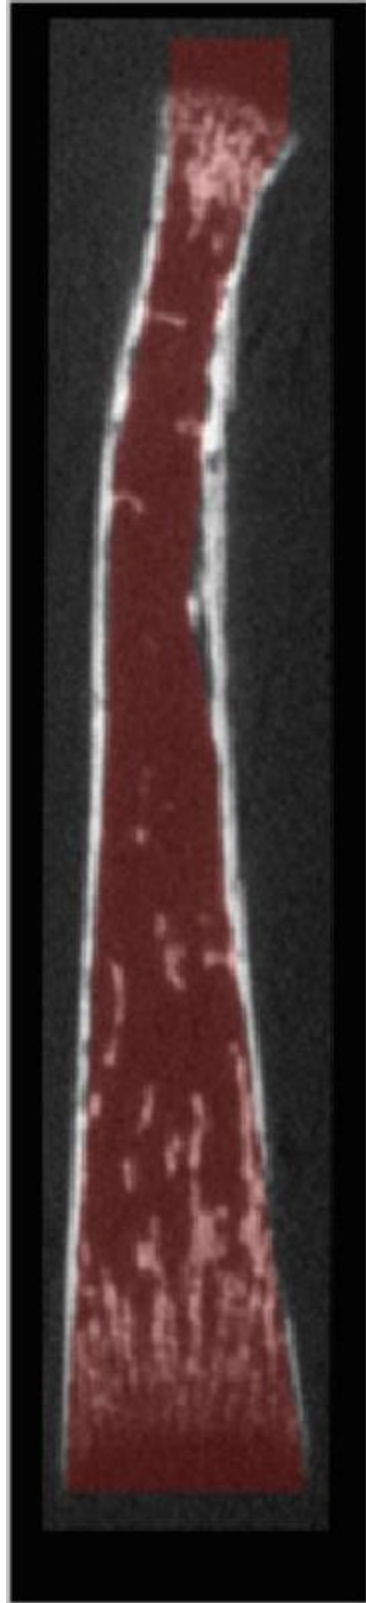

Longitudinal 2

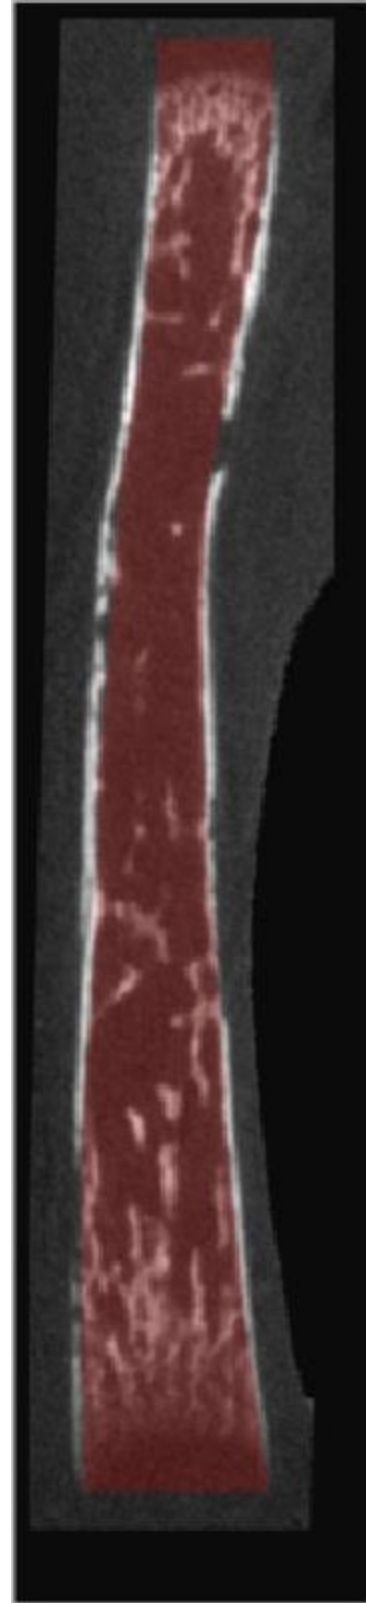

Radius - P6  
Gray scale = Bone CT slide  
Semi-transparent red = Masked regions

Transverse 1

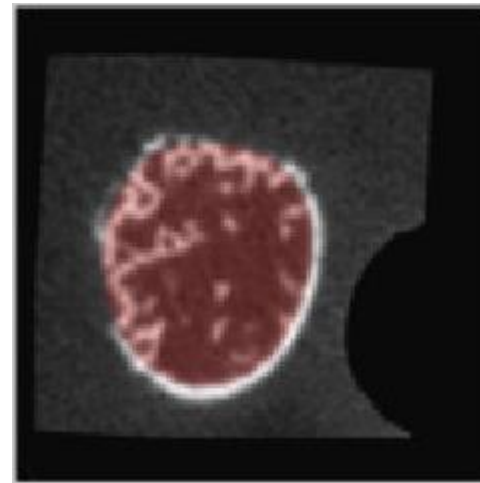

Transverse 2

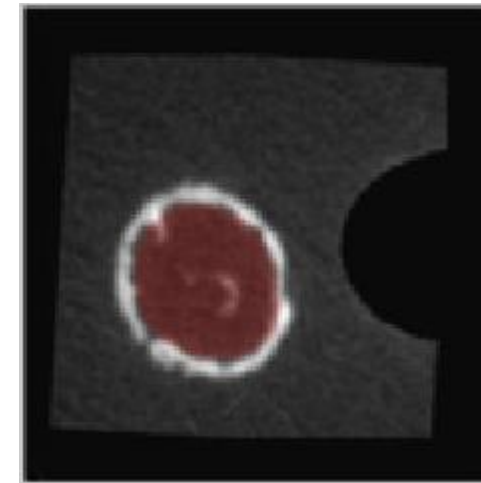

Transverse 3

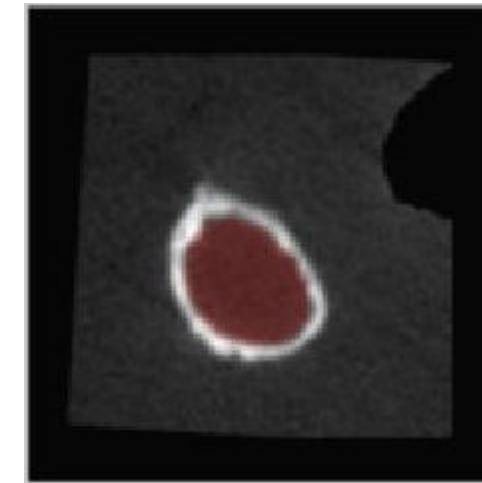

Longitudinal 1

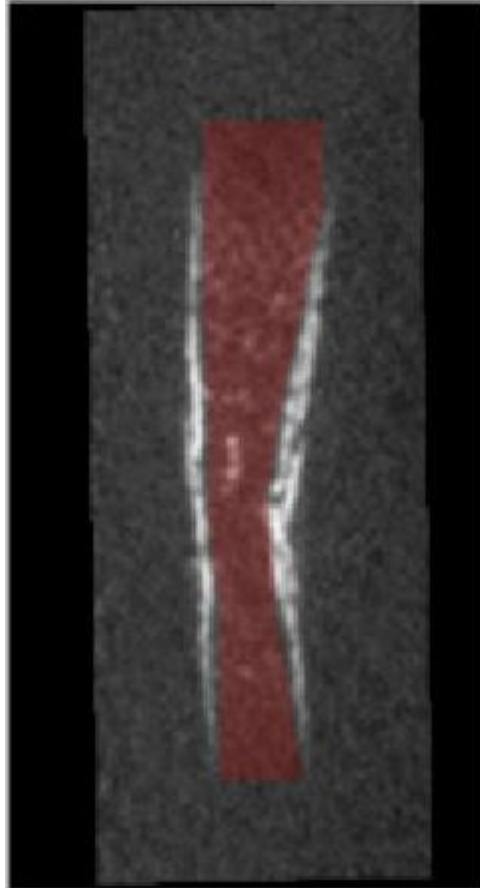

Longitudinal 2

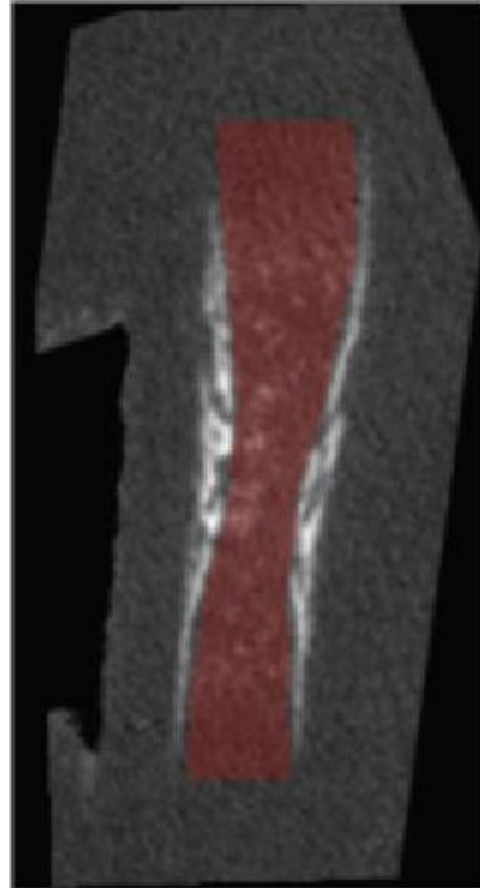

Transverse 1

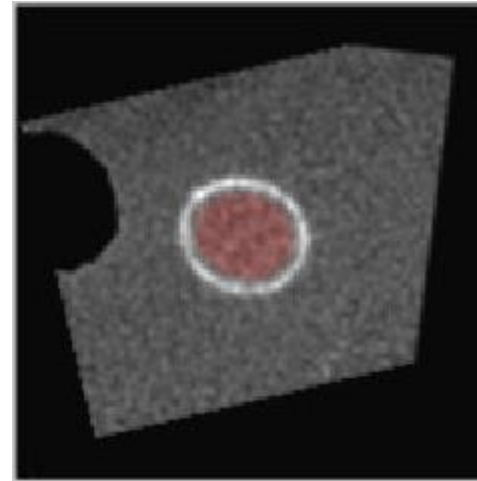

Transverse 2

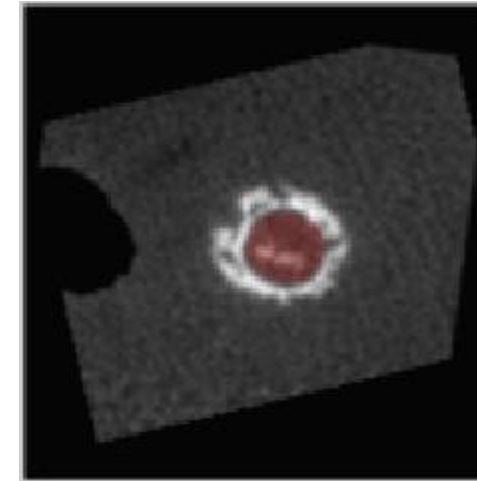

Transverse 3

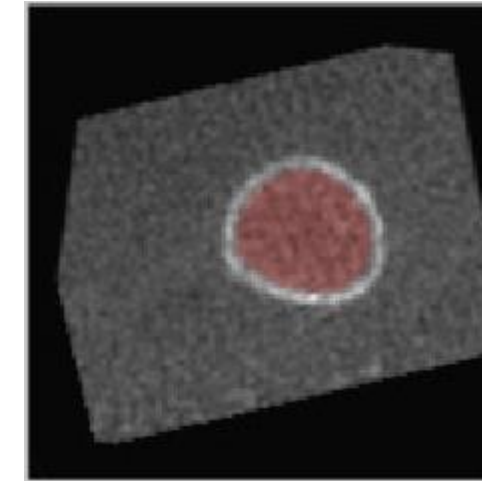

Ulna - E16  
Gray scale = Bone CT slide  
Semi-transparent red = Masked regions

Longitudinal 1

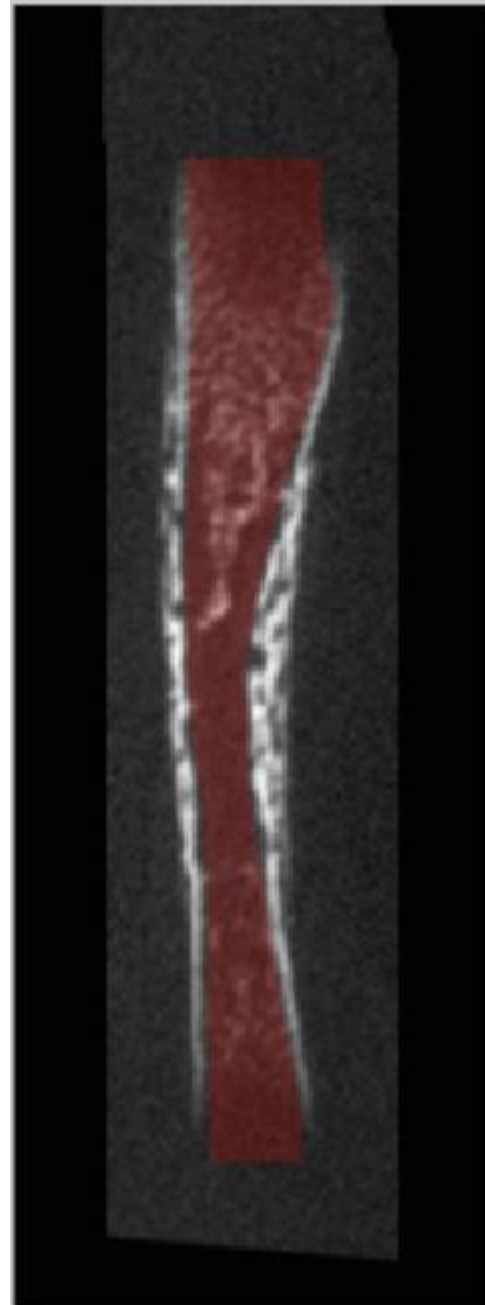

Longitudinal 2

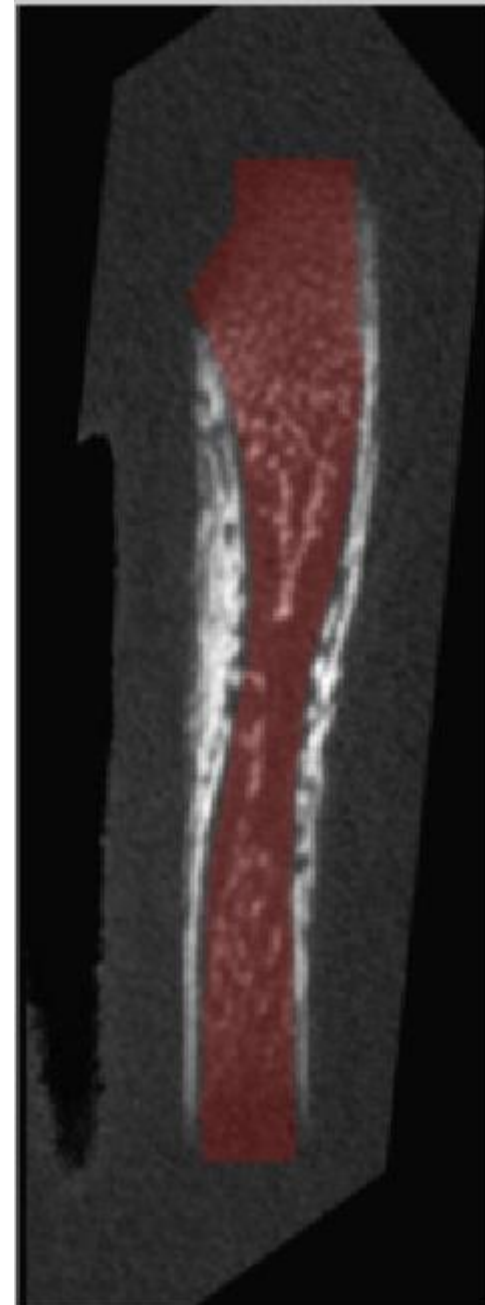

Ulna - E17  
Gray scale = Bone CT slide  
Semi-transparent red = Masked regions

Transverse 1

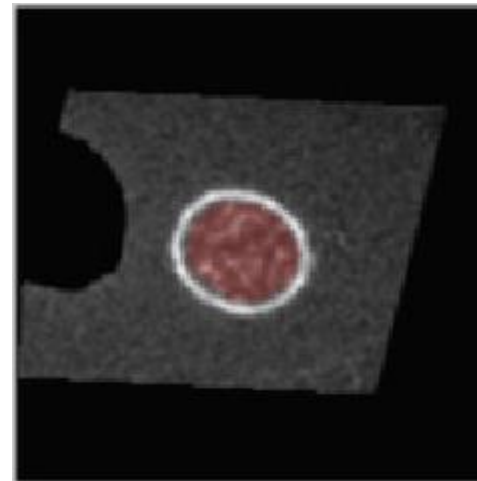

Transverse 2

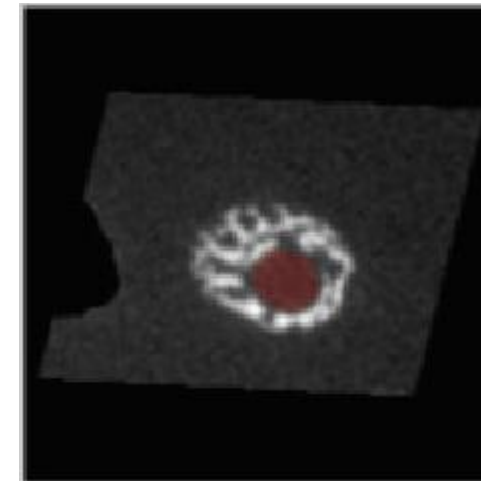

Transverse 3

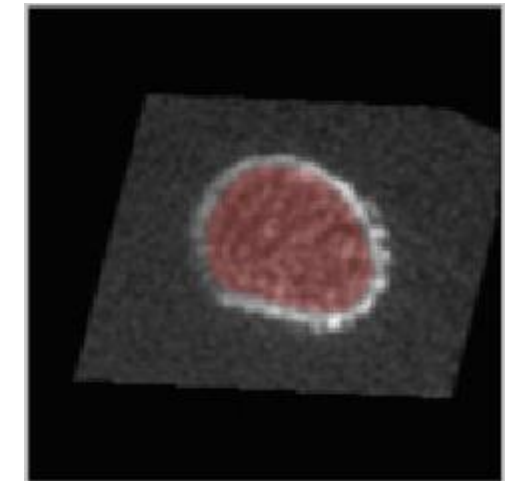

Longitudinal 1

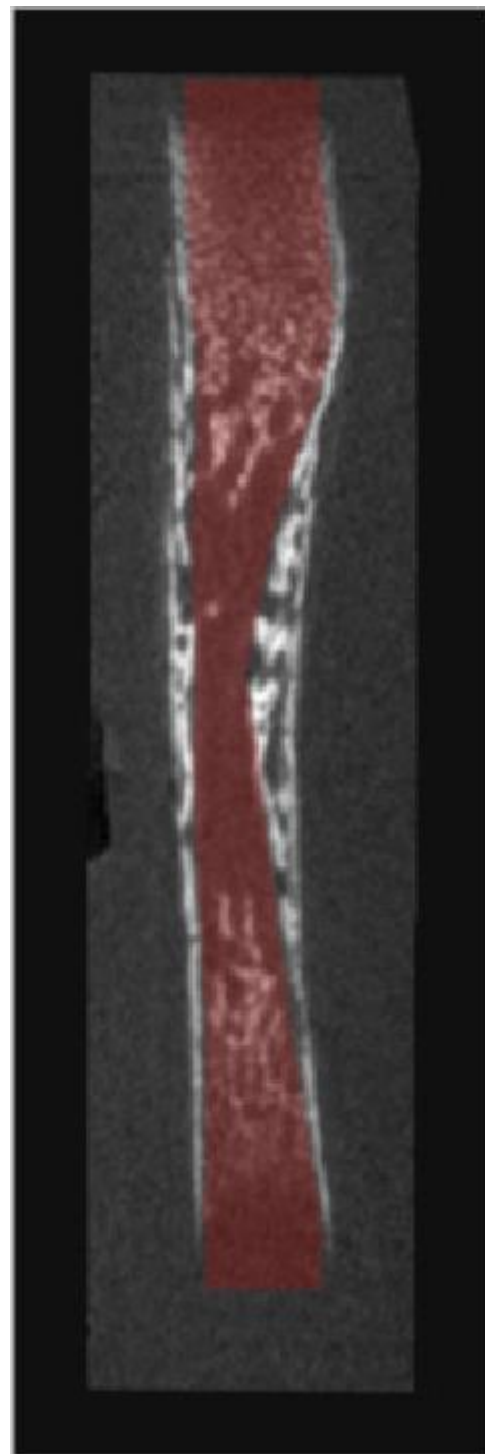

Longitudinal 2

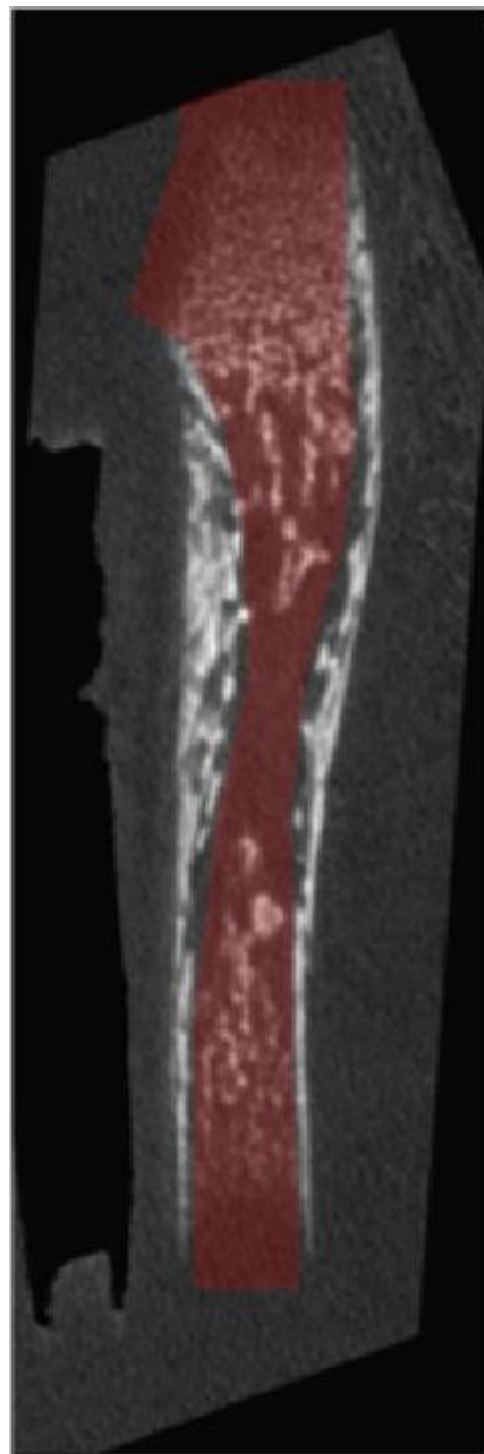

Ulna - E18  
Gray scale = Bone CT slide  
Semi-transparent red = Masked regions

Transverse 1

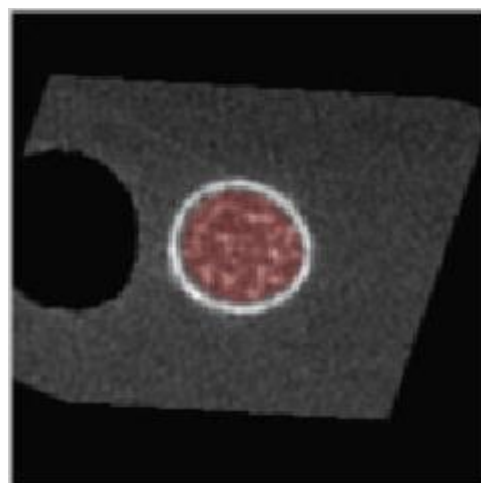

Transverse 2

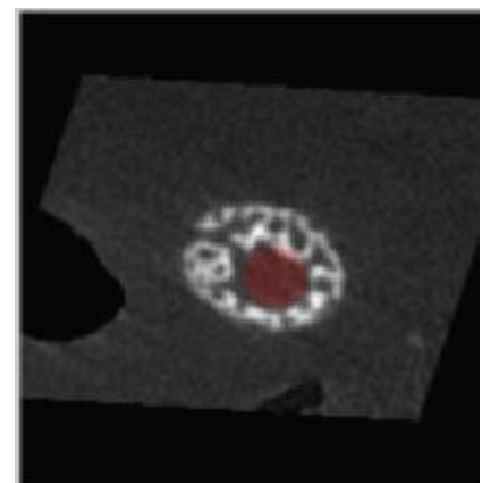

Transverse 3

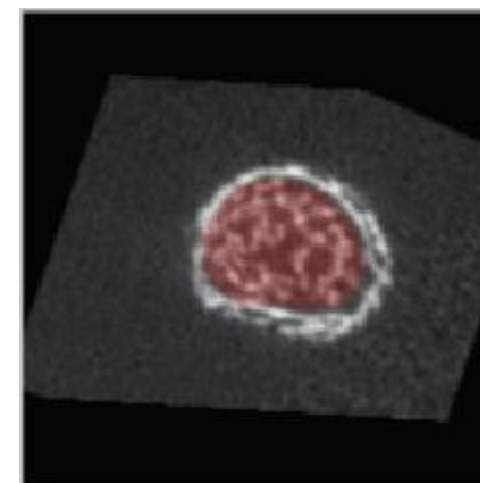



Longitudinal 1

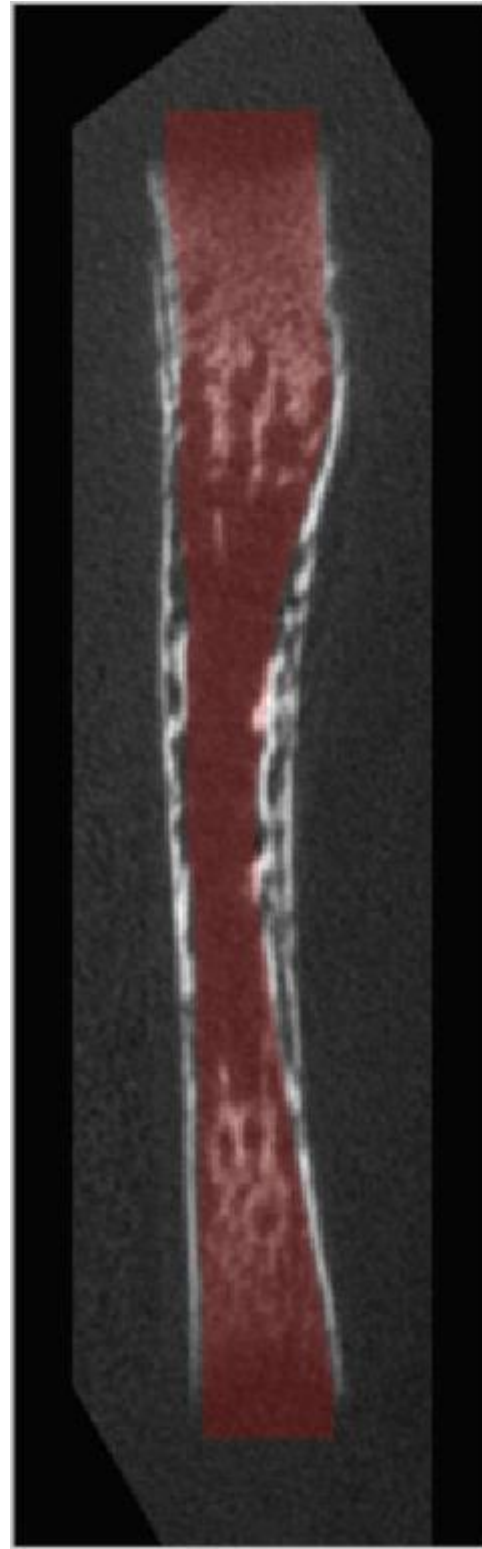

Longitudinal 2

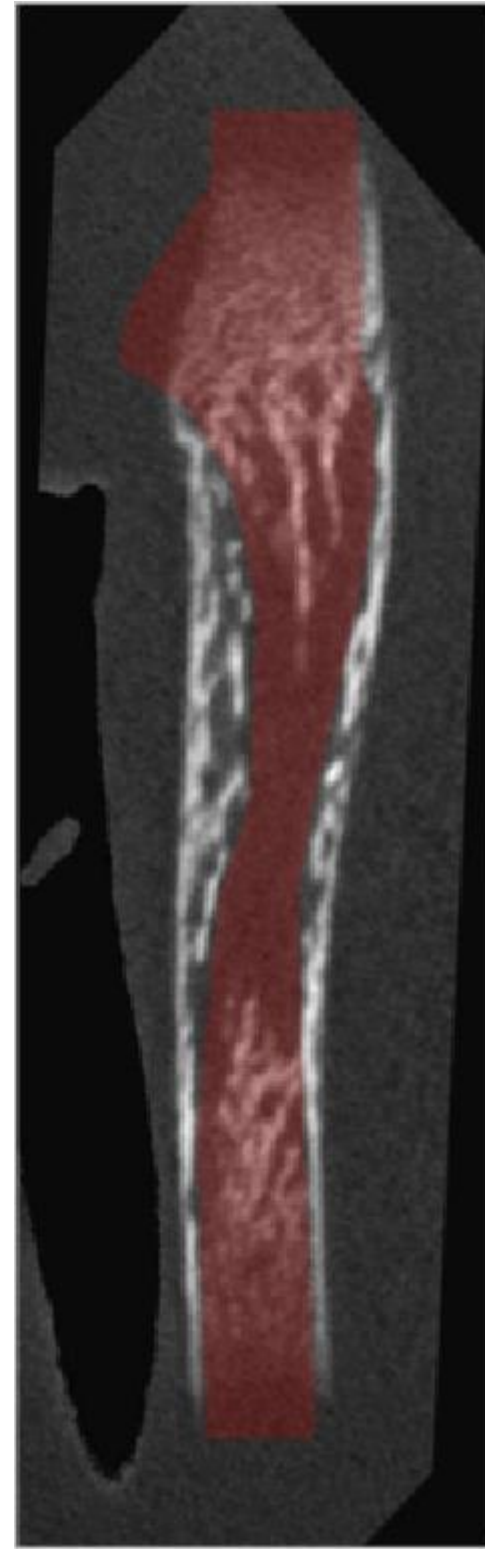

Ulna - P1  
Gray scale = Bone CT slide  
Semi-transparent red = Masked regions

Transverse 1

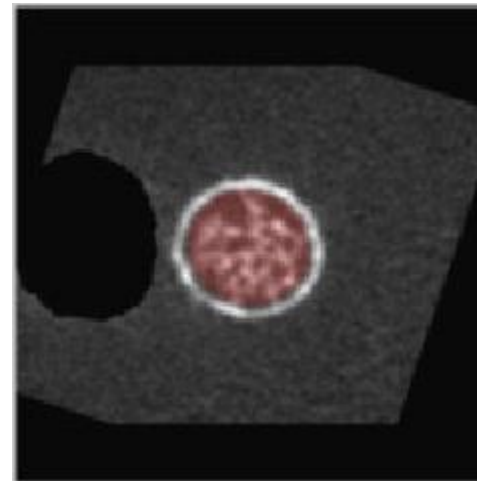

Transverse 2

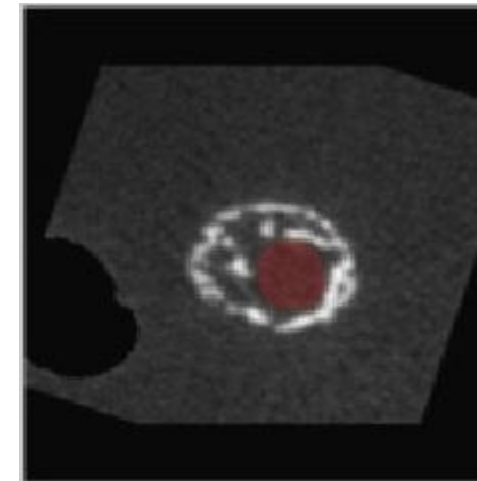

Transverse 3

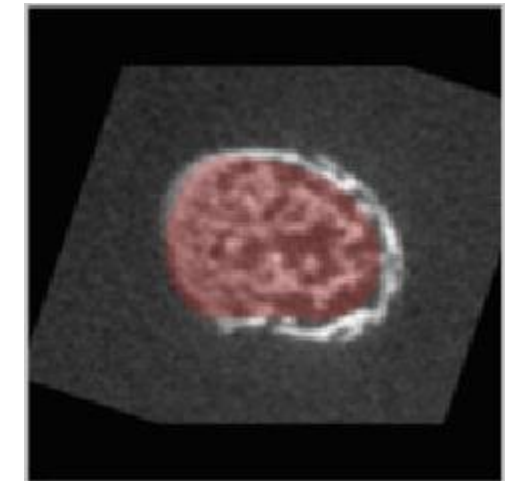

Longitudinal 1

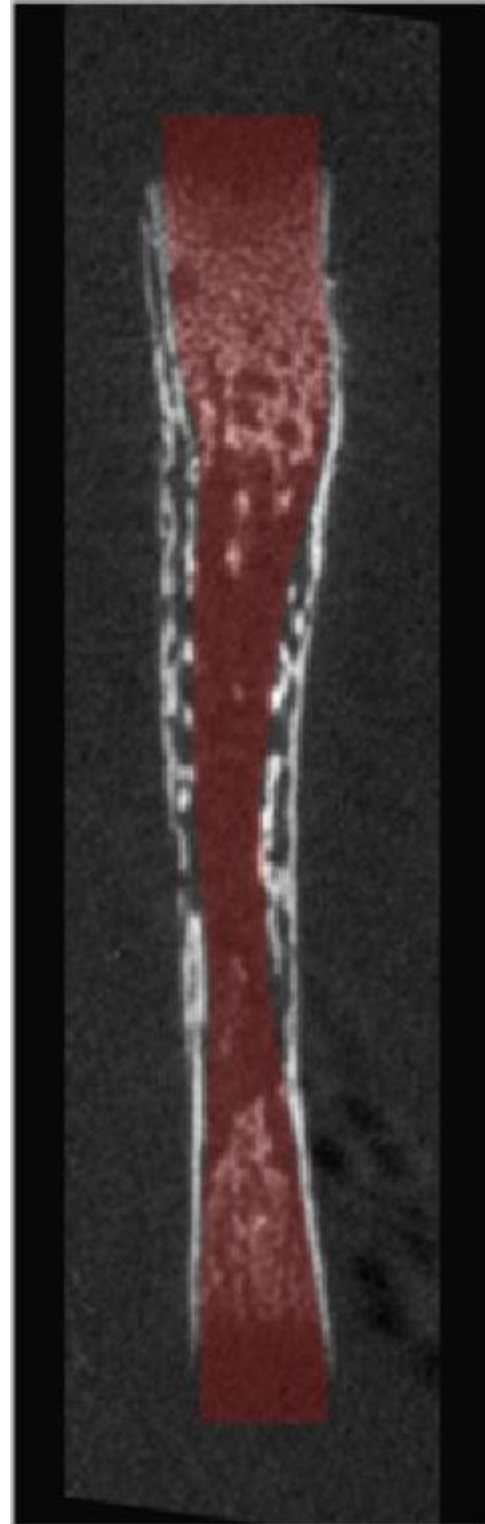

Longitudinal 2

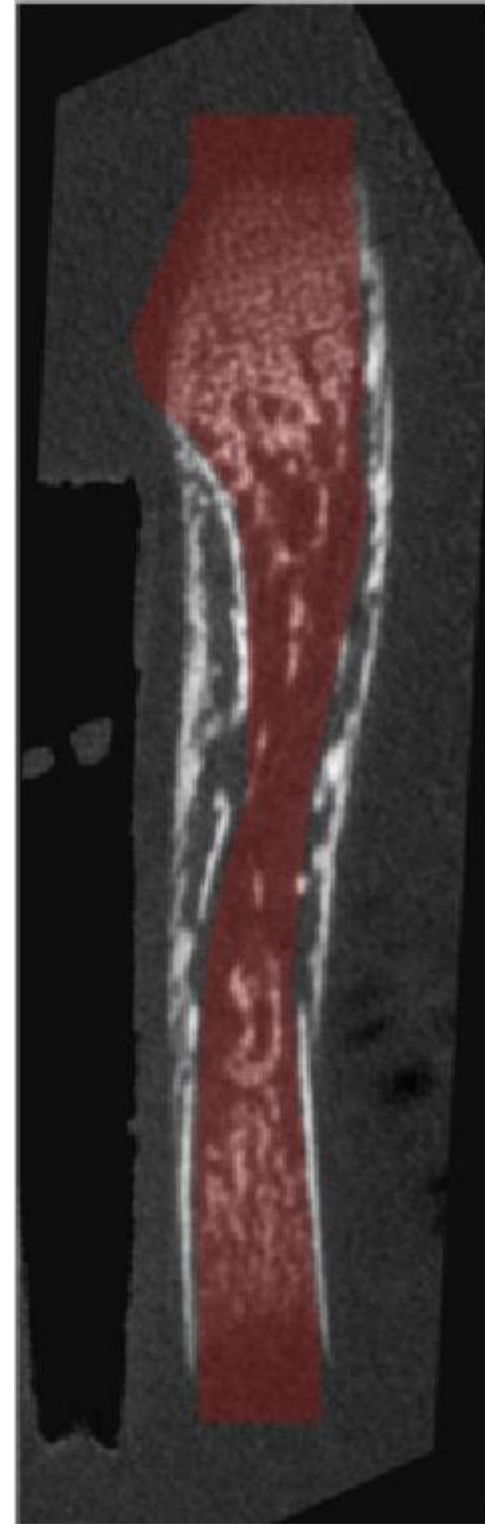

Ulna - P2  
Gray scale = Bone CT slide  
Semi-transparent red = Masked regions

Transverse 1

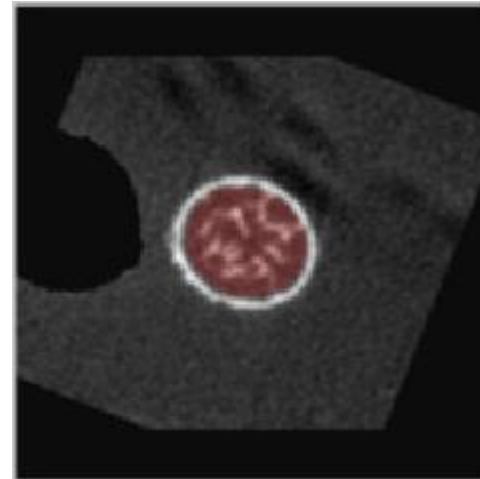

Transverse 2

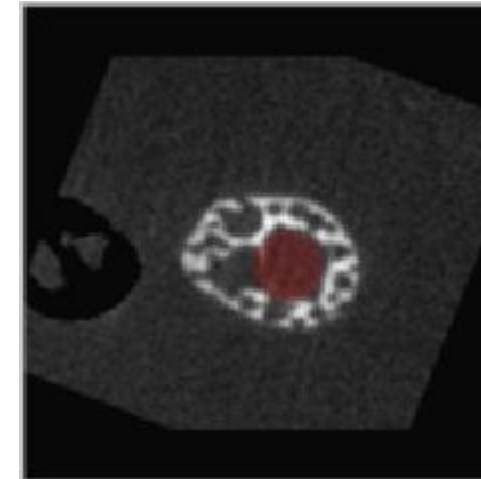

Transverse 3

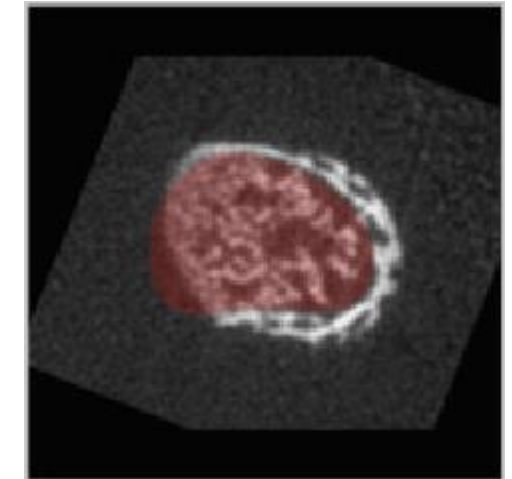

Longitudinal 1

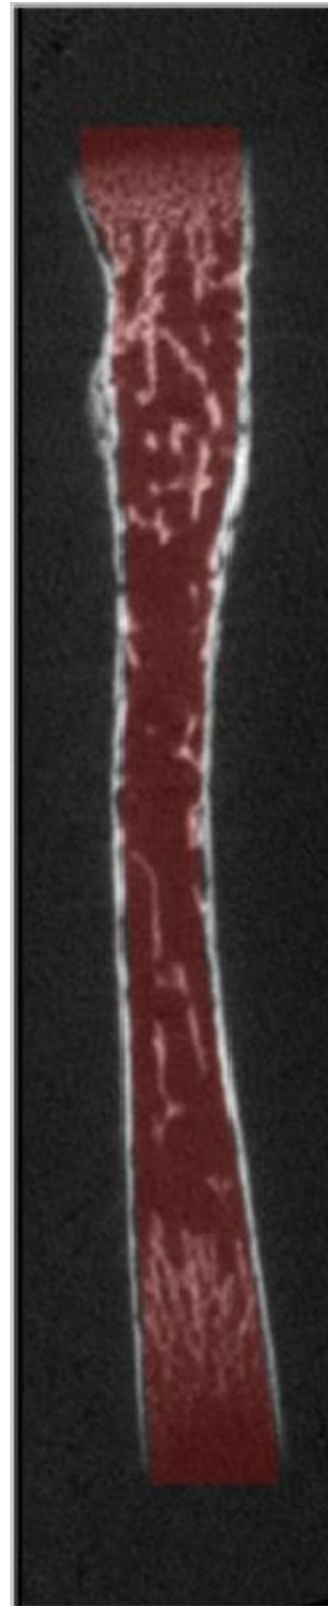

Longitudinal 2

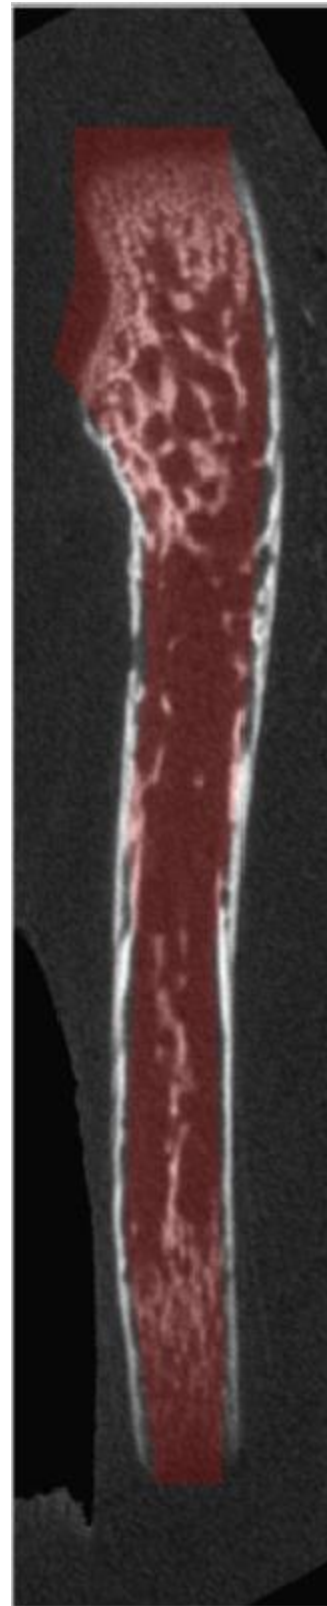

Ulna - P4  
Gray scale = Bone CT slide  
Semi-transparent red = Masked regions

Transverse 1

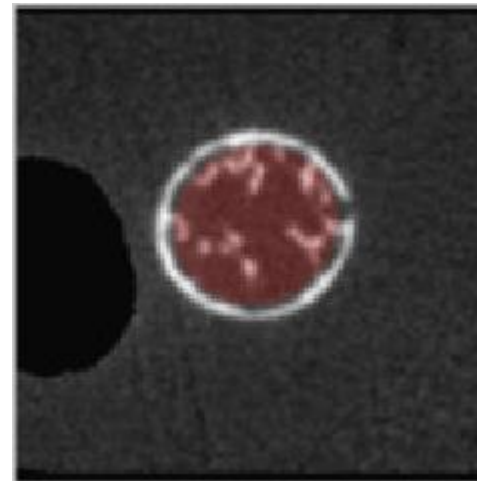

Transverse 2

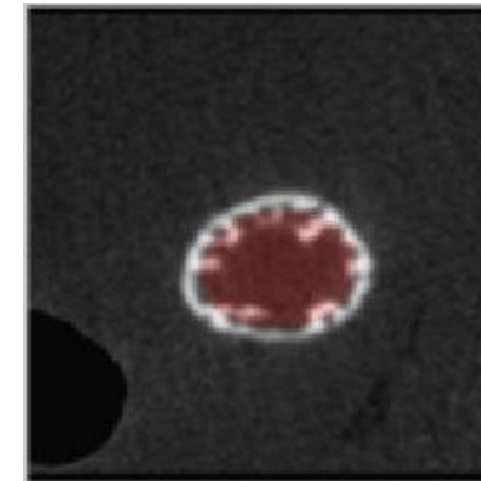

Transverse 3

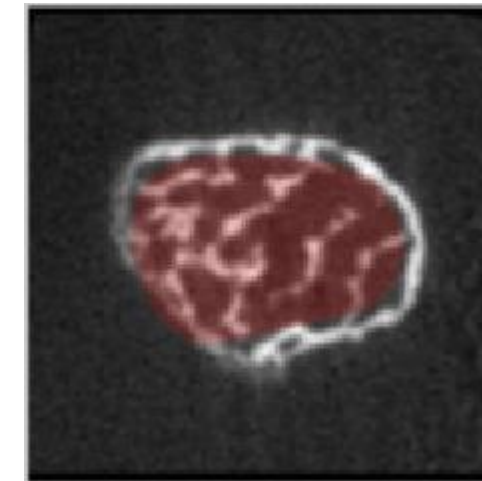

Longitudinal 1

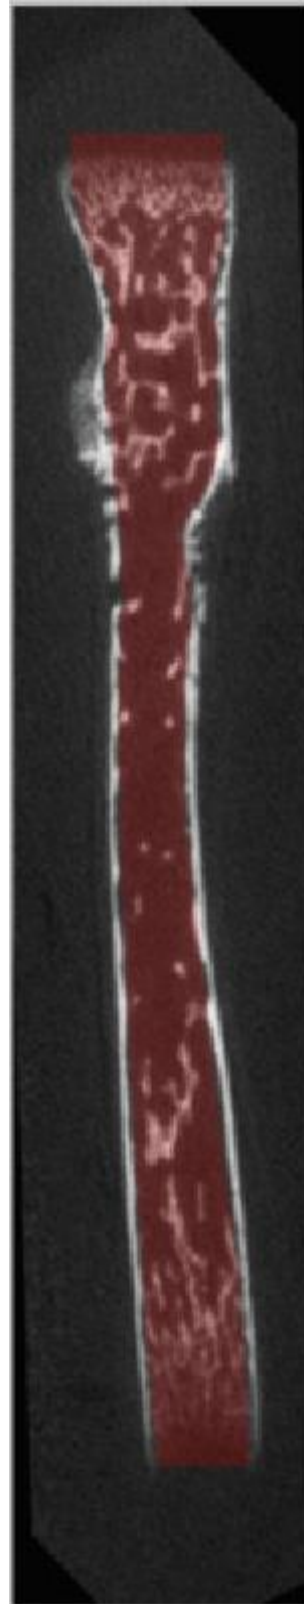

Longitudinal 2

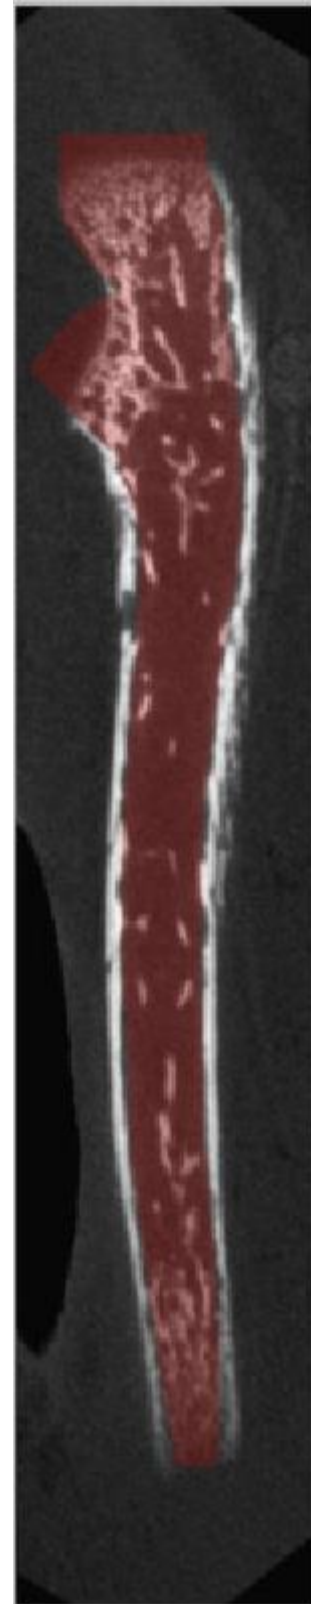

Ulna - P6  
Gray scale = Bone CT slide  
Semi-transparent red = Masked regions

Transverse 1

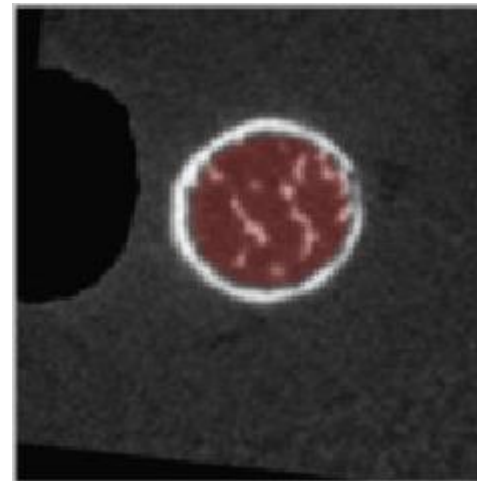

Transverse 2

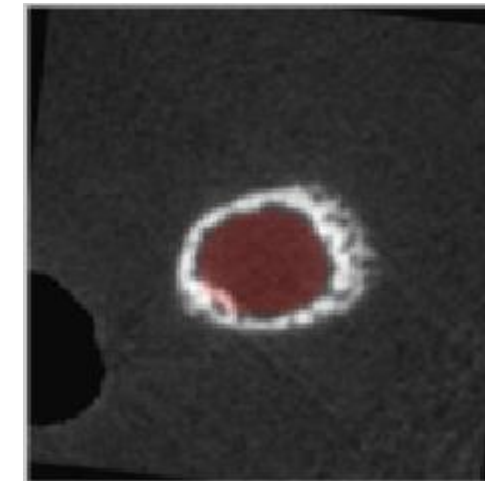

Transverse 3

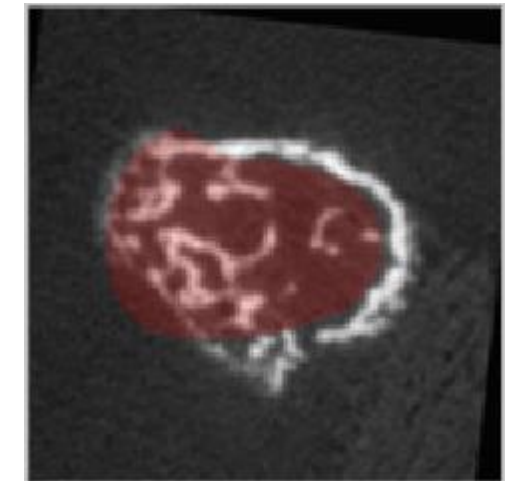

Femur – E16

Gray scale = Bone CT slide

Semi-transparent red = Masked regions

Longitudinal 1

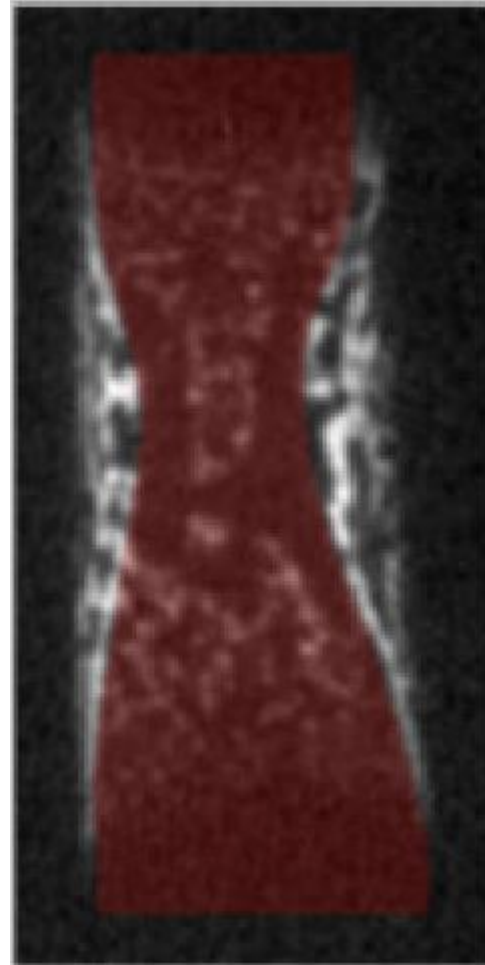

Longitudinal 2

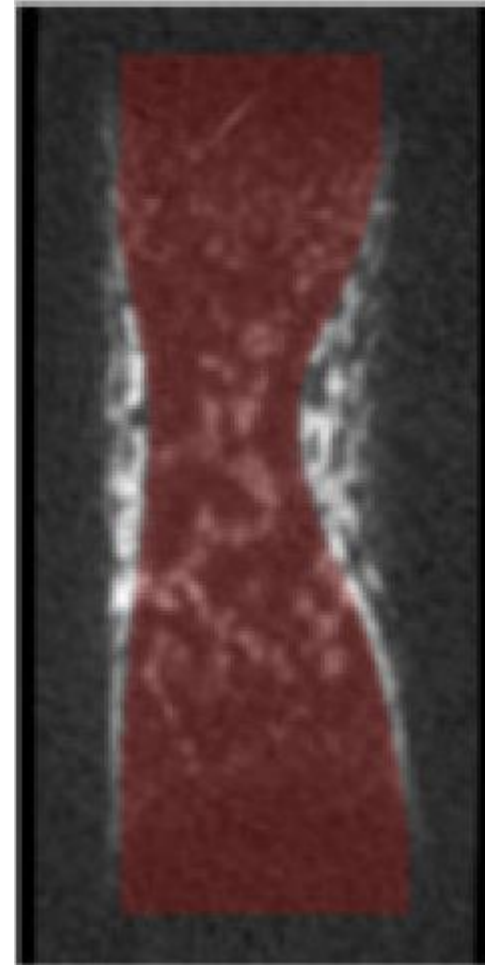

Transverse 1

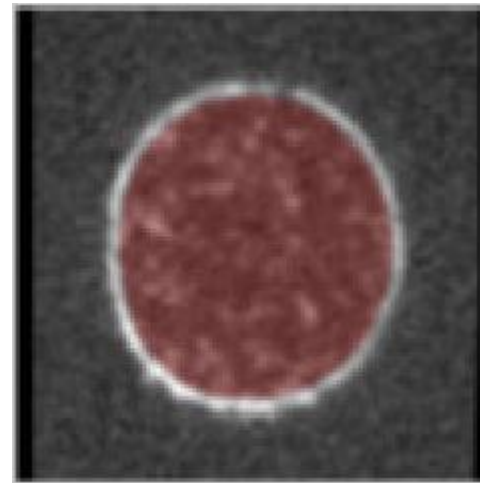

Transverse 2

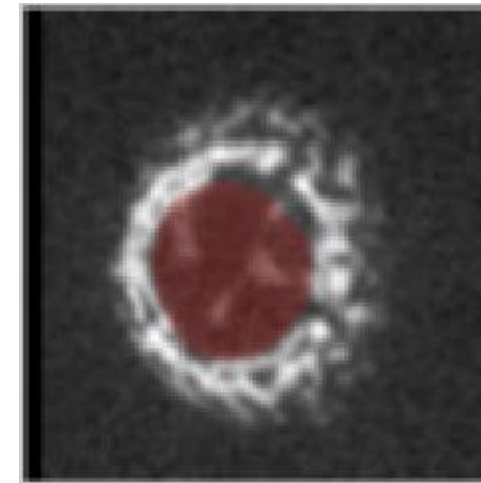

Transverse 3

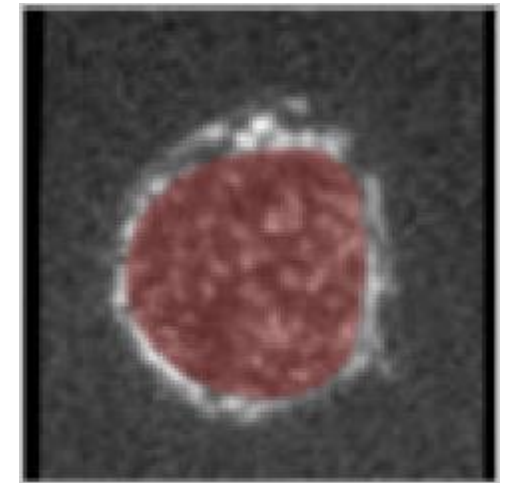

Longitudinal 1

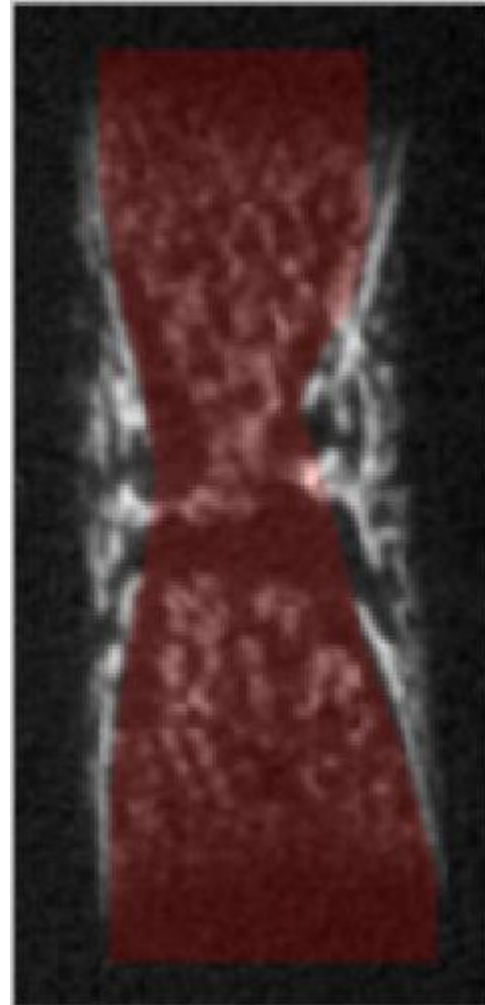

Longitudinal 2

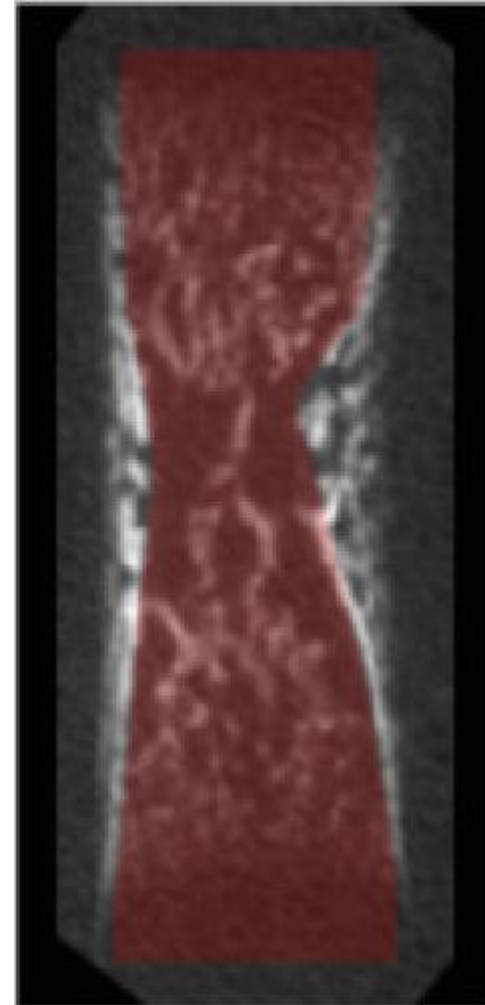

Femur - E17

Gray scale = Bone CT slide

Semi-transparent red = Masked regions

Transverse 1

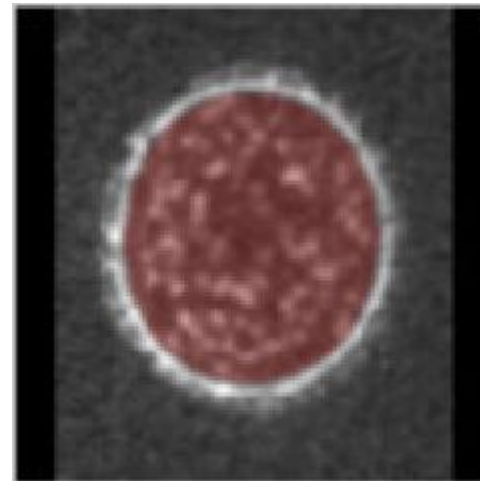

Transverse 2

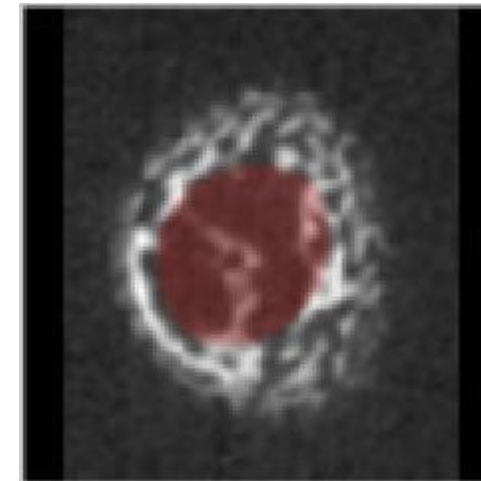

Transverse 3

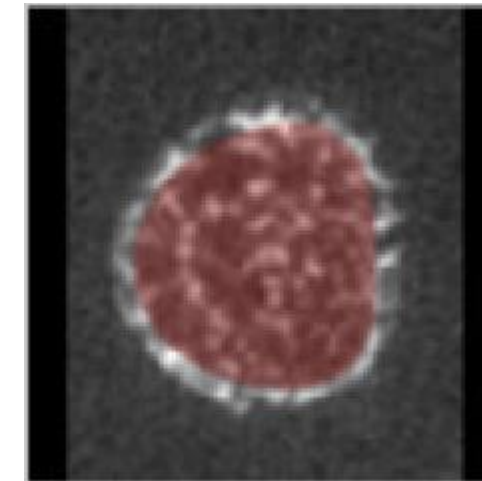

Longitudinal 1

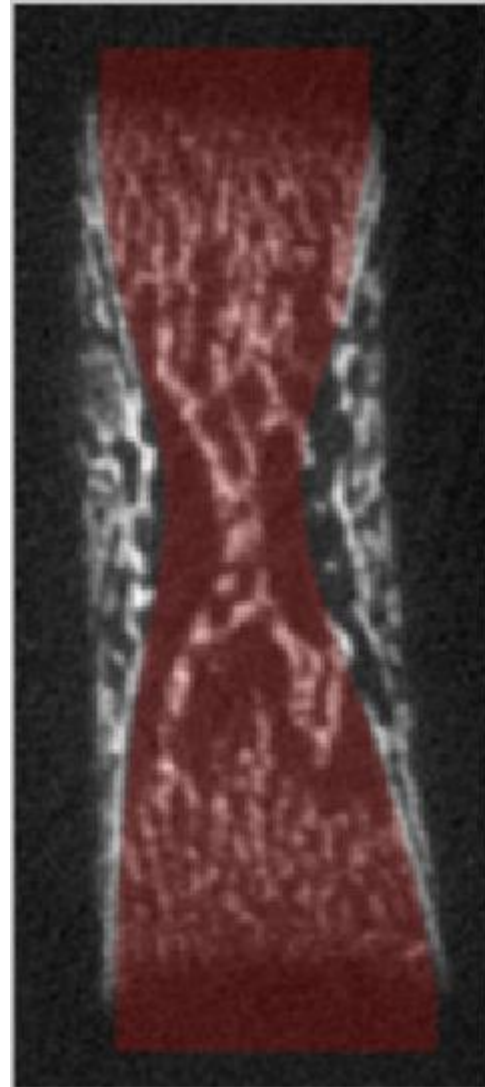

Longitudinal 2

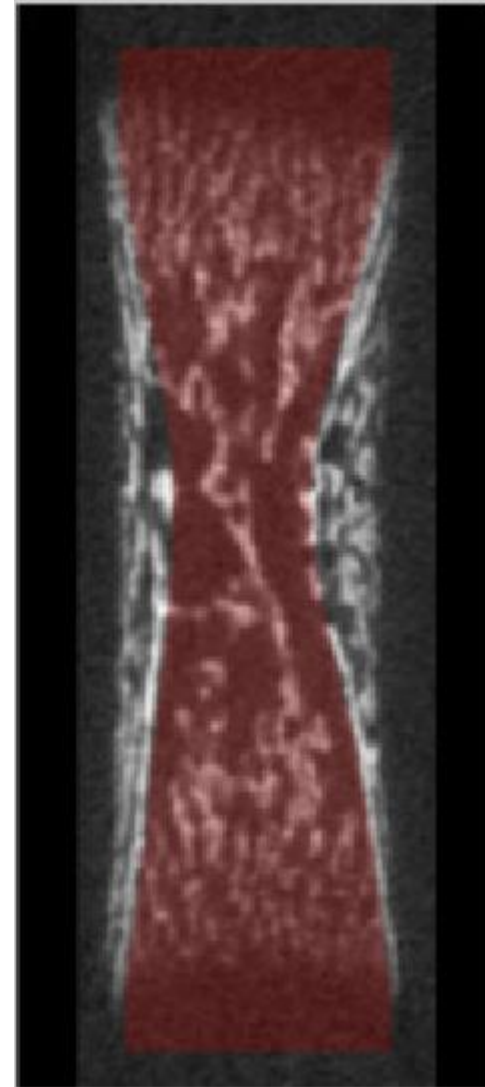

Femur – E18  
Gray scale = Bone CT slide  
Semi-transparent red = Masked regions

Transverse 1

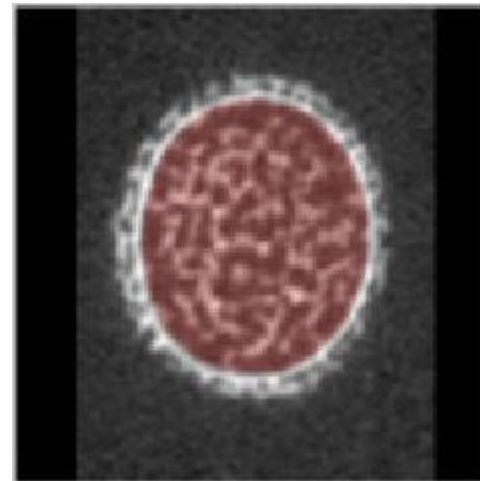

Transverse 2

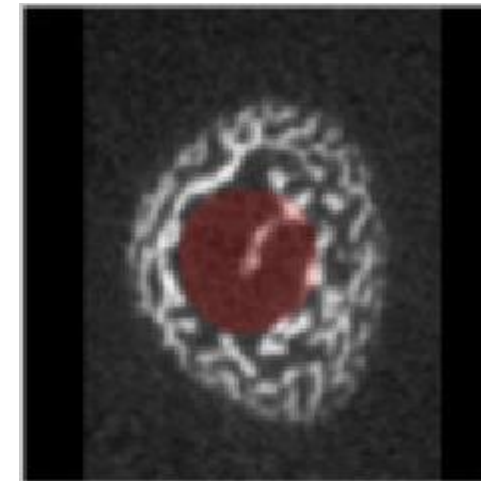

Transverse 3

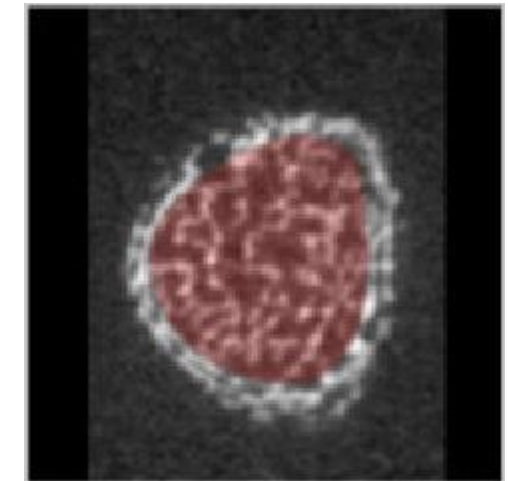

Longitudinal 1

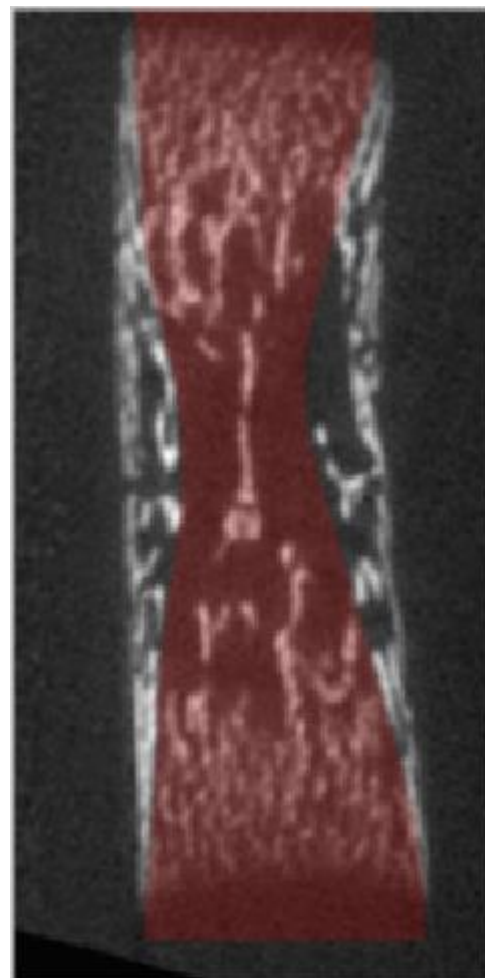

Longitudinal 2

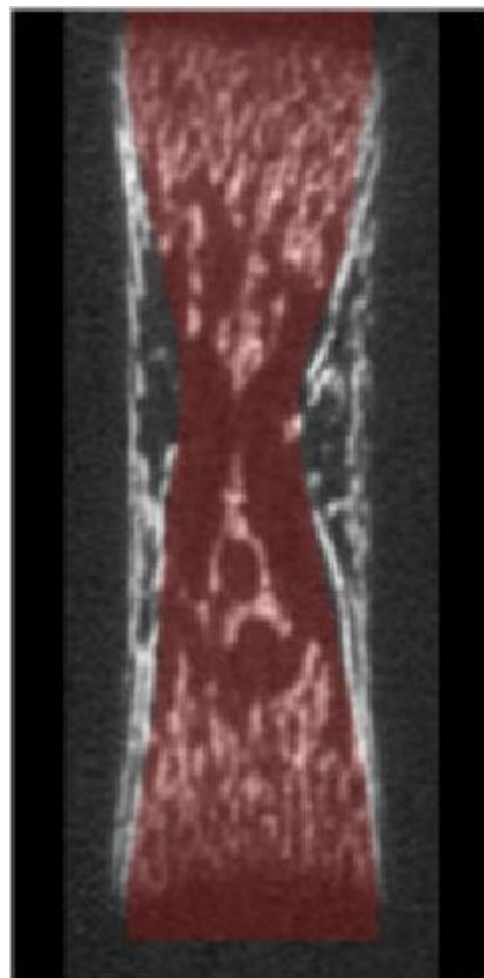

Femur - P1  
Gray scale = Bone CT slide  
Semi-transparent red = Masked regions

Transverse 1

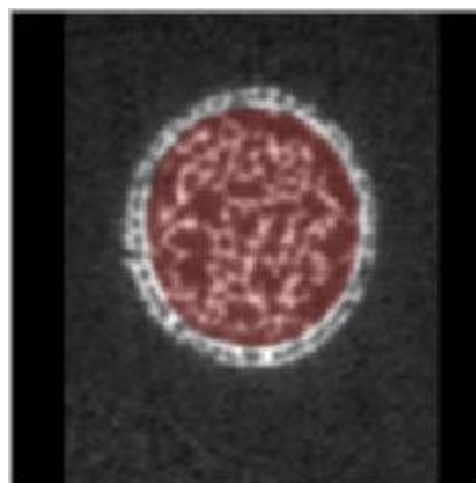

Transverse 2

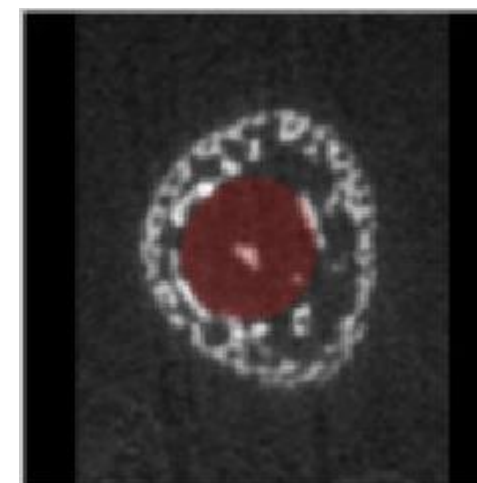

Transverse 3

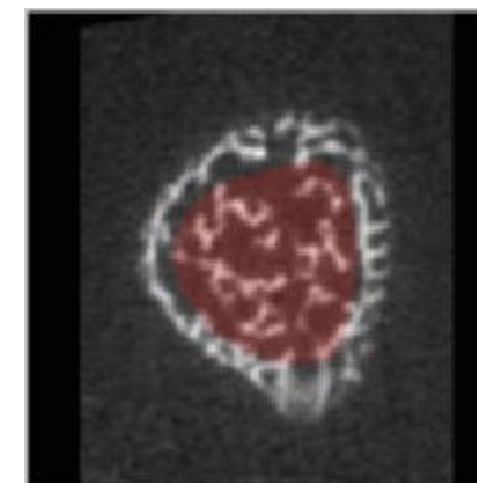



Longitudinal 1

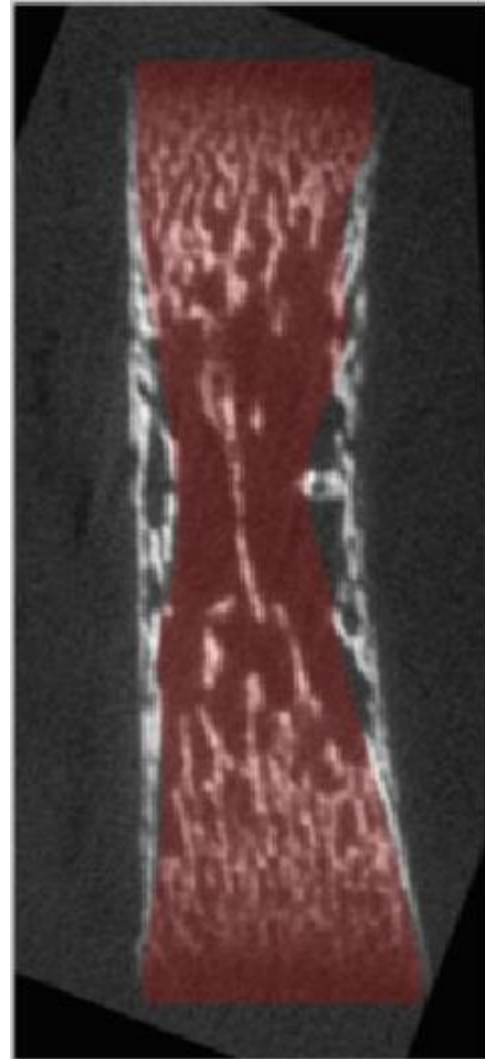

Longitudinal 2

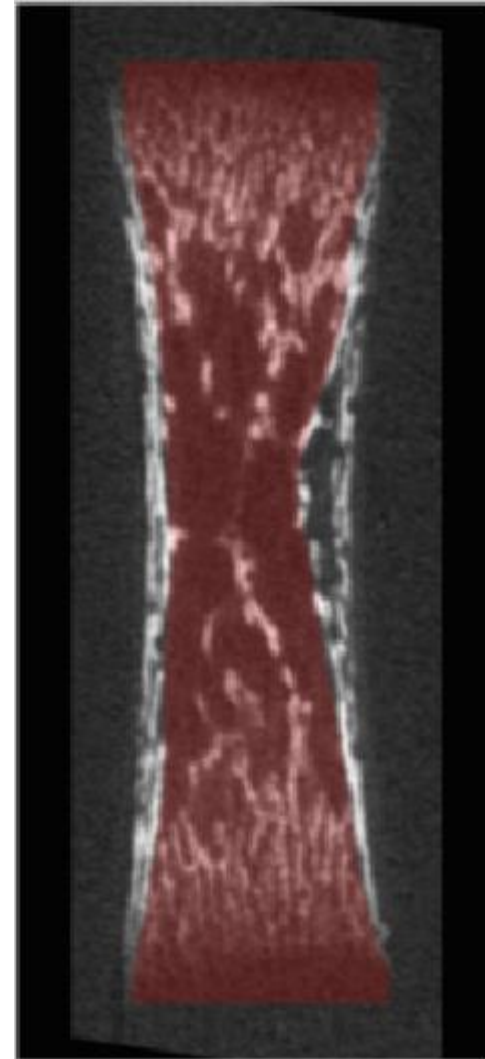

Femur - P2  
Gray scale = Bone CT slide  
Semi-transparent red = Masked regions

Transverse 1

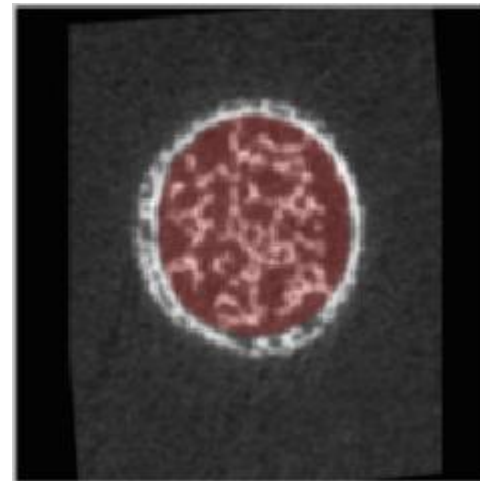

Transverse 2

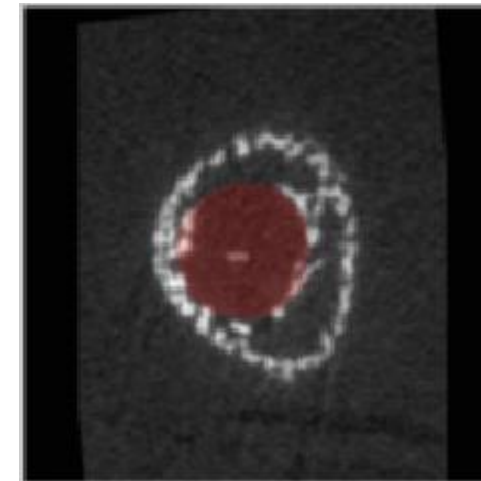

Transverse 3

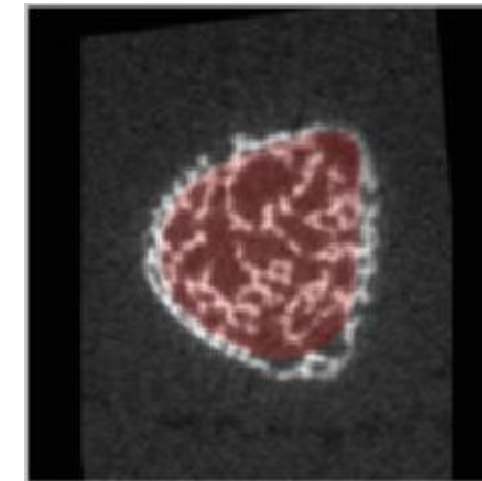

Longitudinal 1

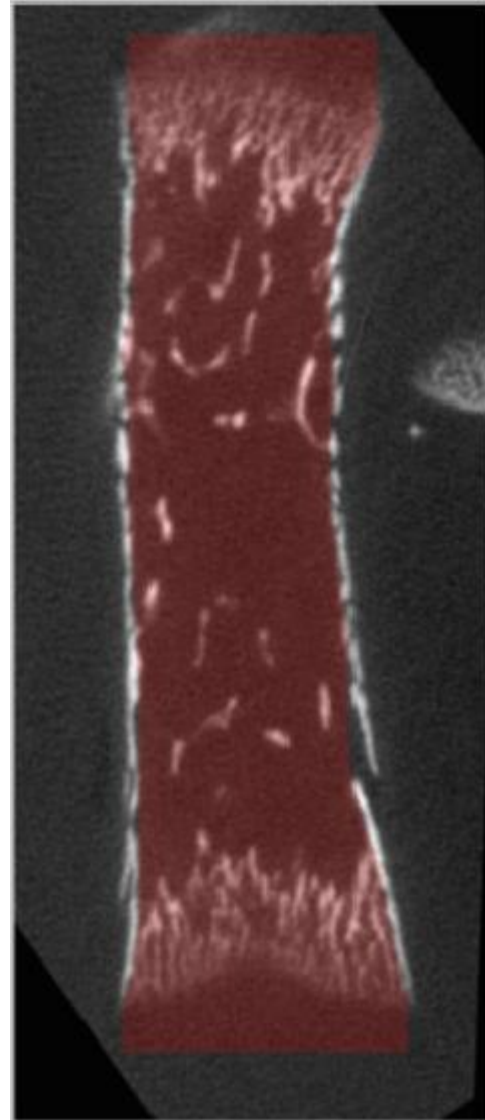

Longitudinal 2

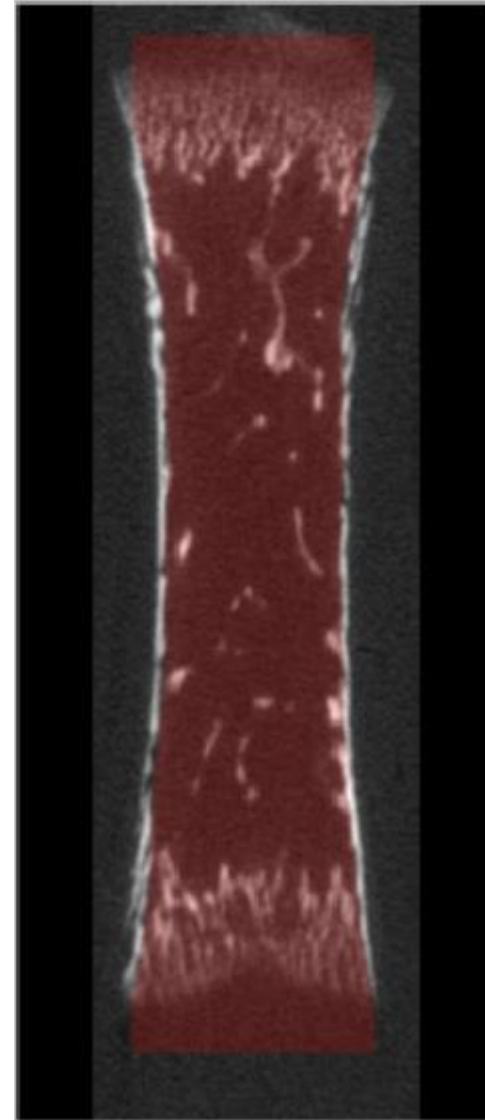

Transverse 1

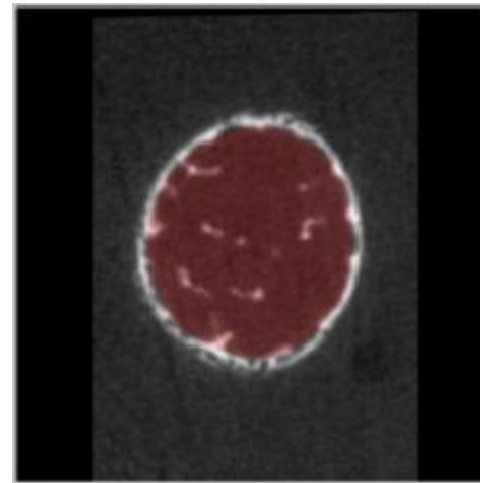

Transverse 2

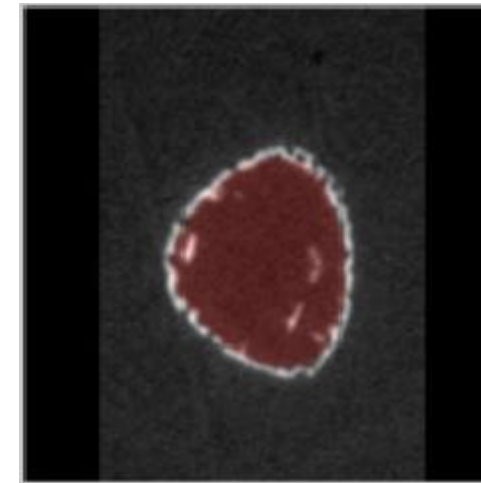

Transverse 3

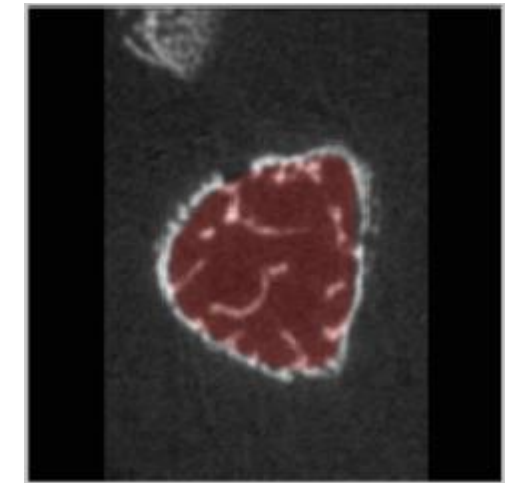

Femur – P4

Gray scale = Bone CT slide

Semi-transparent red = Masked regions

Longitudinal 1

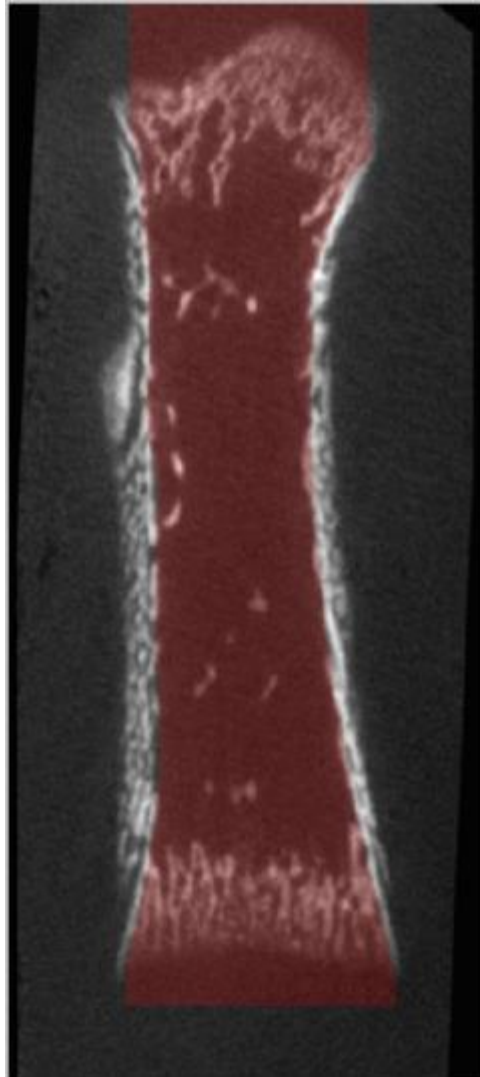

Longitudinal 2

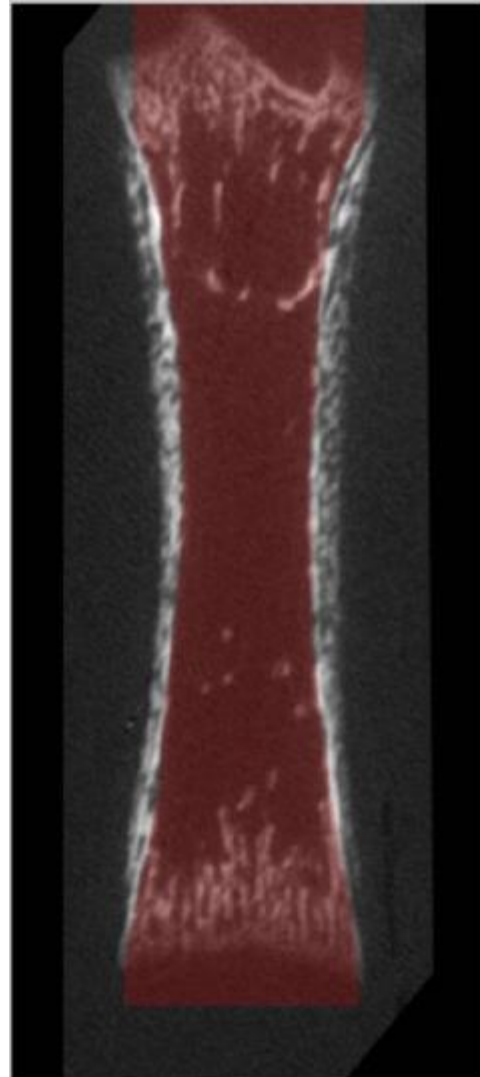

Transverse 1

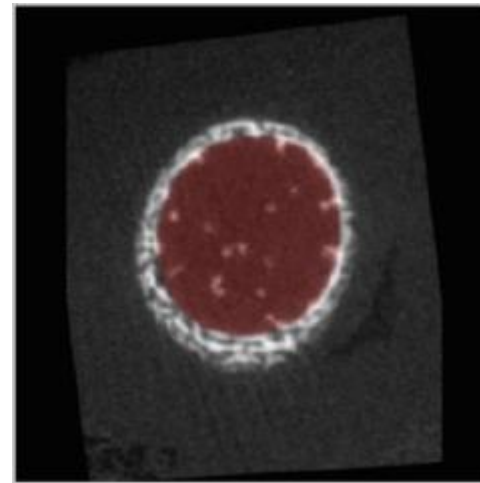

Transverse 2

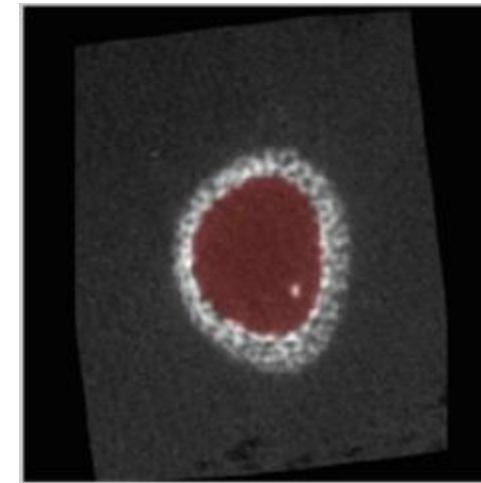

Transverse 3

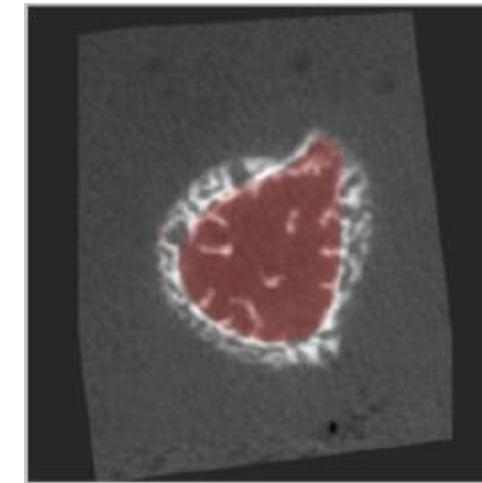

Femur - P6

Gray scale = Bone CT slide

Semi-transparent red = Masked regions
