# Supplementary material for: Isometric Scaling in Developing Long Bones Is Achieved by an Optimal Epiphyseal Growth Balance
Source: PLoS Biol. 2015 Aug 4;13(8):e1002212. doi: 10.1371/journal.pbio.1002212 (PMC4524611; doi:10.1371/journal.pbio.1002212)
Supplement: S1 Data — (XLSX) [file pbio.1002212.s001.xlsx]

## Sheet: Humerus
Bone type	Bone age	Bone ID	Total length	Tip of medial epicondyle	Tip of supinator crest	Distal end of DT	Distal end of head
Humerus	E16	Humerus_WT_E16_p20m3_wt_NA_E16_p20m3_lower_th115	2.591	0.077582			0.76436
Humerus	E16	Humerus_WT_E16_p20m4_wt_NA_th115	2.656	0.0945086			0.788321
Humerus	E17	Humerus_WT_E17_p27m1_wt_NA_th117	3.212	0.0743562		0.519626	0.795933
Humerus	E17	Humerus_WT_E17_p27m2_wt_NA_upper_th130	3.327	0.0845049		0.493249	0.760203
Humerus	E17	Humerus_WT_E17_p27m3_wt_NA_E17_p27m3_bottom_th85	3.355	0.109135		0.495039	0.779194
Humerus	E17	Humerus_WT_E17_p27m4_wt_NA (2)_th151	3.484	0.0992629		0.50977	0.803599
Humerus	P0	Humerus_WT_P0_p24m1_wt_NA_th129	4.383	0.0967849		0.515891	0.796065
Humerus	P0	Humerus_WT_P0_pNAmNA_wt_NA_P0 Collection top2_th87	4.427	0.0836251		0.498089	0.79169
Humerus	P0	Humerus_WT_P0_pNAmNA_wt_NA_P0 Collection middle_th95	4.483	0.0888263		0.497975	0.788046
Humerus	P0	Humerus_WT_P0_pNAmNA_wt_NA_P0 Collection bottom_th100	4.526	0.0733934		0.494791	0.796751
Humerus	P2	Humerus_WT_P2_p34m3_wt_NA_th110	4.825	0.0897105		0.498246	0.809627
Humerus	P2	Humerus_WT_P2_p24m2_wt_NA_FL_WT_P2_p24m2_RL_lower_th97	4.848	0.0791776	0.176527	0.485775	0.823109
Humerus	P2	Humerus_WT_P2_p25m3_wt_NA_th134	4.99	0.093878	0.230102	0.503236	0.803898
Humerus	P8	Humerus_WT_P8_pNAmNA_wt_NA_th170	6.182	0.073484	0.227433	0.515449	0.790529
Humerus	P6	Humerus_WT_P6_p26m3_wt_NA_24-03-2013_th100	6.219	0.0964084	0.238783	0.502217	0.798528
Humerus	P8	Humerus_WT_P8_p24m4_wt_NA_th165	6.254	0.0817522	0.223506	0.48597	0.779404
Humerus	P8	Humerus_WT_P8_p34m4_wt_NA_th155	6.339	0.0674613	0.238679	0.506973	0.798223
Humerus	P8	Humerus_WT_P8_p26mNA_wt_NA_th140	6.539	0.0837976	0.239026	0.511318	0.781516
Humerus	P8	Humerus_WT_P8_p24mNA_wt_NA_th110	6.754	0.0835497	0.244059	0.507962	0.779685
Humerus	P10	Humerus_WT_P10_pNAmNA_wt_NA_Upper 2_age_is_estimated_th170	6.83103	0.0704578	0.220577	0.529588	0.810223
Humerus	P10	Humerus_WT_P10_p24m5_wt_NA_th194	6.84603	0.0673863	0.236125	0.494935	0.78333
Humerus	P10	Humerus_WT_P10_pNAmNA_wt_NA_th135	6.89303	0.0667775	0.215362	0.521867	0.779248
Humerus	P20	Humerus_WT_P20_p33m2_wt_R.vff	8.12273	0.083854	0.242893	0.528483	0.806206
Humerus	P20	Humerus_WT_P20_p33m4_wt_R.vff	8.34593	0.0970459	0.236211	0.546824	0.815255
Humerus	P20	Humerus_WT_P20_p33m3_wt_R.vff	8.44952	0.0877085	0.22484	0.515888	0.813825
Humerus	P24	Humerus_WT_P24_p33m2_wt_R.vff	8.62503	0.0802711	0.222856	0.538212	0.807468
Humerus	P24	Humerus_WT_P24_p33m1_wt_R.vff	8.83819	0.101584	0.232998	0.533373	0.811897
Humerus	P24	Humerus_WT_P24_p33m4_wt_R.vff	8.84924	0.0995001	0.222714		0.800549
Humerus	P28	Humerus_WT_P28_p33m2_wt_R.vff	9.06559	0.0807246	0.231067	0.539595	0.802759
Humerus	P28	Humerus_WT_P28_p33m1_wt_R.vff	9.2456	0.0892146	0.22928	0.546543	0.812063
Humerus	P28	Humerus_WT_P28_p33m4_wt_R.vff	9.28427	0.0894803	0.206921	0.522863
Humerus	P32	Humerus_WT_P32_p33m2_wt_R.vff	9.37847	0.0884771	0.219271	0.539621	0.808828
Humerus	P32	Humerus_WT_P32_p33m3_wt_R.vff	9.51018	0.0832779	0.205115	0.53536	0.814351
Humerus	P32	Humerus_WT_P32_p33m4_wt_R.vff	9.65217	0.0978026	0.224888	0.54966	0.810999
Humerus	P32	Humerus_WT_P32_p33m1_wt_R.vff	9.67826	0.0876782	0.221768	0.531583	0.813608
Humerus	P40	Humerus_WT_P40_p33m2_wt_R.vff	10.1232	0.0737768	0.215163	0.52541	0.807764
Humerus	P40	Humerus_WT_P40_p33m4_wt_R.vff	10.2394	0.0891489	0.202579	0.535617	0.815433
Humerus	P40	Humerus_WT_P40_p33m1_wt_R.vff	10.3497	0.0748197	0.206508	0.529698	0.81924
Legend
E - Embryonic
P - Postnatal
Bone ID - the identification string of the bone image in the database
Total length - the distance (mm) from the distal end and the proximal end of the bone
Empty cells indicate that data was not extracted due to an imaging artefact

## Sheet: Radius
Bone type	Bone age	Bone ID	Total length	Radial tuberosity
Radius	E16	Radius_WT_E16_p20m3_wt_NA_E16_p20m3_lower_th125	2.08246	0.875288
Radius	E16	Radius_WT_E16_p20m4_wt_NA_th120	2.13949	0.867767
Radius	E16	Radius_WT_E16_pNAmNA_wt_NA_20-2-2013_trial3_th123	2.42404	0.846269
Radius	E17	Radius_WT_E17_p27m2_wt_NA_th140	2.595	0.883939
Radius	E17	Radius_WT_E17_p27m3_wt_NA_E17_p27m3_bottom_th92	2.781	0.885841
Radius	E17	Radius_WT_E17_p27m4_wt_NA_th111	2.985	0.896894
Radius	P0	Radius_WT_P0_p24m1_wt_NA_th124	3.624	0.884046
Radius	P0	Radius_WT_P0_pNAmNA_wt_NA_P0 Collection top_th85	3.668	0.859386
Radius	P0	Radius_WT_P0_pNAmNA_wt_NA_P0 Collection bottom_th89	3.745
Radius	P0	Radius_WT_P0_pNAmNA_wt_NA_P0 Collection middle_th89	3.754	0.846634
Radius	P2	Radius_WT_P2_p34m3_wt_NA_th90	4.131	0.84295
Radius	P2	Radius_WT_P2_p24m2_wt_NA_FL_WT_P2_p24m2_RL_upper_th98	4.223	0.855852
Radius	P2	Radius_WT_P2_p25m3_wt_NA_b_th97	4.255
Radius	P6	Radius_WT_P6_p35m7_wt_NA_th160	5.283	0.859508
Radius	P8	Radius_WT_P8_pNAmNA_wt_NA_th130	5.668	0.859073
Radius	P8	Radius_WT_P8_p24m4_wt_NA_th125	5.695	0.858694
Radius	P8	Radius_WT_P8_p34m4_wt_NA_th155	5.894	0.870365
Radius	P8	Radius_WT_P8_p24mNA_wt_NA_th110	6.189	0.86302
Radius	P8	Radius_WT_P8_p26mNA_wt_NA_th140	6.214	0.868399
Radius	P10	Radius_WT_P10_pNAmNA_wt_NA_th132	6.389	0.888569
Radius	P10	Radius_WT_P10_pNAmNA_wt_NA_P6_FL_th175	6.877	0.902756
Radius	P10	Radius_WT_P10_pNAmNA_wt_NA_th115	6.887	0.884618
Radius	P20	Radius_WT_P20_p33m2_wt_R.vff	8.74121	0.893496
Radius	P20	Radius_WT_P20_p33m1_wt_R.vff	8.997	0.894518
Radius	P20	Radius_WT_P20_p33m3_wt_R.vff	9.13726	0.883613
Radius	P24	Radius_WT_P24_p33m2_wt_R.vff	9.33588	0.890765
Radius	P24	Radius_WT_P24_p33m1_wt_R.vff	9.47185	0.856647
Radius	P24	Radius_WT_P24_p33m3_wt_R.vff	9.49274	0.895578
Radius	P24	Radius_WT_P24_p33m4_wt_R.vff	9.54058	0.881527
Radius	P28	Radius_WT_P28_p33m2_wt_R.vff	9.57546	0.880473
Radius	P28	Radius_WT_P28_p33m4_wt_R.vff	9.86348	0.875848
Radius	P28	Radius_WT_P28_p33m1_wt_R.vff	9.88842	0.891113
Radius	P32	Radius_WT_P32_p33m3_wt_R.vff	9.97049	0.899153
Radius	P32	Radius_WT_P32_p33m4_wt_R.vff	10.0962	0.880387
Radius	P32	Radius_WT_P32_p33m1_wt_R.vff	10.1576	0.874525
Radius	P40	Radius_WT_P40_p33m1_wt_R.vff	10.5446	0.896808
Radius	P40	Radius_WT_P40_p33m3_wt_R.vff	10.5446	0.896439
Radius	P40	Radius_WT_P40_p33m4_wt_R.vff	10.5993	0.897139
Legend
E - Embryonic
P - Postnatal
Bone ID - the identification string of the bone image in the database
Total length - the distance (mm) from the distal end and the proximal end of the bone
Empty cells indicate that data was not extracted due to an imaging artefact

## Sheet: Ulna
Bone type	Bone age	Bone ID	Total length	Coronoid process	Olecranon process
Ulna	E16	Ulna_WT_E16_p20m3_wt_NA_E16_p20m3_lower_th125	2.76307	0.723201	0.873339
Ulna	E16	Ulna_WT_E16_p20m4_wt_NA_th120	2.82932	0.71662	0.863242
Ulna	E16	Ulna_WT_E16_pNAmNA_wt_NA_20-2-2013_trial3_th125	3.16056	0.730951	0.887304
Ulna	E17	Ulna_WT_E17_p27m2_wt_NA_lower_th140	3.37	0.754144	0.904101
Ulna	E17	Ulna_WT_E17_p27m3_wt_NA_E17_p27m3_bottom_th95	3.705	0.755182	0.89158
Ulna	E17	Ulna_WT_E17_p27m4_wt_NA_th119	3.884	0.742654	0.894127
Ulna	P0	Ulna_WT_P0_pNAmNA_wt_NA_P0 Collection bottom_th95	4.754	0.742852	0.864342
Ulna	P0	Ulna_WT_P0_pNAmNA_wt_NA_P0 Collection middle_th95	4.755	0.731118	0.889742
Ulna	P2	Ulna_WT_P2_p34m3_wt_NA_th90	5.268	0.722086	0.865361
Ulna	P2	Ulna_WT_P2_p25m3_wt_NA_b_th105	5.402	0.732963	0.886551
Ulna	P8	Ulna_WT_P8_p24m4_wt_NA_th132	7.021	0.725177	0.868057
Ulna	P8	Ulna_WT_P8_pNAmNA_wt_NA_th130	7.068	0.746678	0.886019
Ulna	P8	Ulna_WT_P8_p26m3_wt_NA_FLRAdUl_P8_WT_p26m3_24-3-2013_th174	7.114	0.736079	0.877092
Ulna	P8	Ulna_WT_P8_p34m4_wt_NA_th155	7.372	0.747757	0.87258
Ulna	P8	Ulna_WT_P8_p26mNA_wt_NA_th140	7.813	0.73668	0.865077
Ulna	P8	Ulna_WT_P8_p24mNA_wt_NA_th110	7.913	0.736124	0.87289
Ulna	P10	Ulna_WT_P10_pNAmNA_wt_NA_th130	8.473	0.745743	0.873551
Ulna	P10	Ulna_WT_P10_pNAmNA_wt_NA_P6_FL_th170	8.476		0.874805
Ulna	P20	Ulna_WT_P20_p33m2_wt_R.vff	10.972	0.759897	0.865762
Ulna	P20	Ulna_WT_P20_p33m3_wt_R.vff	11.1007	0.755917	0.868029
Ulna	P20	Ulna_WT_P20_p33m1_wt_R.vff	11.2695	0.774827	0.870152
Ulna	P24	Ulna_WT_P24_p33m2_wt_R.vff	11.4153	0.7639	0.857725
Ulna	P24	Ulna_WT_P24_p33m1_wt_R.vff	11.559	0.775398	0.86871
Ulna	P24	Ulna_WT_P24_p33m3_wt_R.vff	11.6281	0.773774	0.866531
Ulna	P24	Ulna_WT_P24_p33m4_wt_R.vff	11.6531	0.760051
Ulna	P28	Ulna_WT_P28_p33m1_wt_R.vff	12.0046	0.770135	0.866535
Ulna	P32	Ulna_WT_P32_p33m2_wt_R.vff	12.0786	0.775549	0.87796
Ulna	P28	Ulna_WT_P28_p33m4_wt_R.vff	12.1146	0.759853	0.862582
Ulna	P28	Ulna_WT_P28_p33m2_wt_R.vff	12.1268		0.855482
Ulna	P32	Ulna_WT_P32_p33m1_wt_R.vff	12.2065	0.773301	0.868105
Ulna	P32	Ulna_WT_P32_p33m4_wt_R.vff	12.3017	0.76604	0.866594
Ulna	P32	Ulna_WT_P32_p33m3_wt_R.vff	12.3017		0.858303
Ulna	P40	Ulna_WT_P40_p33m1_wt_R.vff	12.7821	0.779186	0.869722
Ulna	P40	Ulna_WT_P40_p33m3_wt_R.vff	12.896	0.776026	0.85323
Ulna	P40	Ulna_WT_P40_p33m4_wt_R.vff	13.0062	0.770878	0.865985
Legend
E - Embryonic
P - Postnatal
Bone ID - the identification string of the bone image in the database
Total length - the distance (mm) from the distal end and the proximal end of the bone
Empty cells indicate that data was not extracted due to an imaging artefact

## Sheet: Femur
Bone type	Bone age	Bone ID	Total length	Proximal end of condyle	Distal end of TT	Proximal end of TT	Lesser trochanter	Distal end of head	Proximal end of head
Femur	E16	Femur_WT_E16_p20m1_wt_NA_th100	2.29947	0.158571			0.750572	0.822793	0.960955
Femur	E16	Femur_WT_E16_p20m2_wt_NA_b_th118	2.36589	0.192245			0.766656	0.836849	0.971133
Femur	E16	Femur_WT_E16_p20m3_wt_NA_E16_p20m3_mid 2_th125	2.56514	0.197539			0.757691	0.851896	0.975749
Femur	E17	Femur_WT_E17_p27m2_wt_NA_th130	2.727	0.199851	0.549355	0.668505	0.785006	0.843257	0.989451
Femur	E17	Femur_WT_E17_p27m3_wt_NA_E17_p27m3_top_th100	2.998	0.165167	0.538472	0.673859	0.77983	0.805806	0.991771
Femur	E17	Femur_WT_E17_p27m4_wt_NA_th130	3.055	0.192021	0.558361	0.691974	0.768711	0.795967	0.979061
Femur	P0	Femur_WT_P0_p35m1_wt_NA_validate_age_th105	3.99	0.179034	0.558093	0.679339	0.779832	0.819644	0.978892
Femur	P0	Femur_WT_P0_p24m1_wt_R_th123	4.083	0.183589	0.554577	0.673061	0.770703	0.828682	0.986071
Femur	P0	Femur_WT_P0_p25m1_wt_NA_th121	4.133	0.1735	0.559591	0.676642	0.773658	0.83038	0.985865
Femur	P2	Femur_WT_P2_p24m2_wt_NA_FL_WT_P2_p24m2_RL_upper_th100	4.498	0.185477	0.558646	0.666199	0.773751	0.844382	1.00416
Femur	P2	Femur_WT_P2_p25m3_wt_NA_b_th73	4.534			0.663566	0.770265	0.786934	0.947033
Femur	P2	Femur_WT_P2_p34m3_wt_NA_th150	4.641	0.191952	0.554452	0.674975	0.779214	0.811885	0.968293
Femur	P6	Femur_WT_P6_p35m6_wt_NA_th130	5.576	0.1698	0.572518	0.70132	0.801718	0.830206	0.989481
Femur	P8	Femur_WT_P8_pNAmNA_wt_NA_P8_HL_th165	5.925	0.204427	0.583994	0.718044	0.785718	0.812528	0.962421
Femur	P8	Femur_WT_P8_p24m4_wt_NA_2_th165	6.24	0.173178	0.583708	0.686692	0.763062	0.801495	0.956549
Femur	P8	Femur_WT_P8_p34m4_wt_NA_th155	6.532	0.171453	0.589055	0.697621	0.783605	0.833348	0.980602
Femur	P8	Femur_WT_P8_p26mNA_wt_NA_th160	6.682	0.167159	0.587505	0.706369	0.766033	0.826314	0.981068
Femur	P8	Femur_WT_P8_p24mNA_wt_NA_th145	6.725	0.139868	0.581147	0.687942	0.771187	0.819502	0.961226
Femur	P10	Femur_WT_P10_pNAmNA_wt_NA_b_th135	7.057	0.167374	0.575359	0.71144	0.790479	0.82501	0.995111
Femur	P10	Femur_WT_P10_pNAmNA_wt_NA_2-8-2013_th135	7.247	0.16685	0.576344	0.697431	0.786105	0.83094	0.996331
Femur	P10	Femur_WT_P10_pNAmNA_wt_NA_th130	7.426	0.168399	0.588441	0.696368	0.781933	0.825687	0.98761
Femur	P20	Femur_WT_P20_p33m2_wt_R.vff	9.31832	0.18124	0.550851	0.696888	0.765851	0.8422	0.954555
Femur	P20	Femur_WT_P20_p33m4_wt_R.vff	9.62838	0.178497	0.602198	0.709834	0.767928	0.826071	0.959555
Femur	P20	Femur_WT_P20_p33m3_wt_R.vff	9.72563	0.181945	0.593666	0.71656	0.774073	0.831634	0.971873
Femur	P24	Femur_WT_P24_p33m2_wt_R.vff	10.0981	0.176923	0.581628	0.700657	0.764295	0.834748	0.962023
Femur	P24	Femur_WT_P24_p33m4_wt_R.vff	10.2394	0.172993	0.588332	0.720527	0.767068	0.829827	0.963102
Femur	P24	Femur_WT_P24_p33m3_wt_R.vff	10.2438		0.576026		0.771978	0.818498	0.951717
Femur	P24	Femur_WT_P24_p33m1_wt_R.vff	10.4502	0.17685	0.583121	0.697274	0.78142	0.850662	0.981249
Femur	P28	Femur_WT_P28_p33m2_wt_R.vff	10.5868	0.170619	0.57876	0.707516	0.775182	0.8352	0.971994
Femur	P28	Femur_WT_P28_p33m3_wt_R.vff	10.9035	0.157183	0.583338	0.701212	0.774055	0.832992	0.95815
Femur	P28	Femur_WT_P28_p33m4_wt_R.vff	11.0242	0.172876	0.580124	0.717152	0.775444	0.826391	0.957525
Femur	P28	Femur_WT_P28_p33m1_wt_R.vff	11.0381	0.168531	0.581948	0.719624	0.777188	0.835407	0.966583
Femur	P32	Femur_WT_P32_p33m3_wt_R.vff	11.3734	0.158003	0.566351	0.72062	0.784604	0.833624	0.95996
Femur	P32	Femur_WT_P32_p33m4_wt_R.vff	11.4459	0.158915	0.585987	0.711523	0.774311	0.815946	0.949682
Femur	P32	Femur_WT_P32_p33m1_wt_R.vff	11.6241	0.155305	0.588876	0.713399	0.781727	0.844174	0.967785
Femur	P40	Femur_WT_P40_p33m4_wt_R.vff	12.4388	0.14992	0.568446	0.735895	0.787558	0.82587	0.955045
Femur	P40	Femur_WT_P40_p33m3_wt_R.vff	12.4691	0.152478	0.583179	0.737211	0.781923	0.839706	0.955643
Femur	P40	Femur_WT_P40_p33m1_wt_R.vff	12.6169	0.169999	0.582616	0.741016	0.791377	0.8549	0.969479
Legend
E - Embryonic
P - Postnatal
Bone ID - the identification string of the bone image in the database
Total length - the distance (mm) from the distal end and the proximal end of the bone
Empty cells indicate that data was not extracted due to an imaging artefact

## Sheet: Tibia
Bone type	Bone age	Bone ID	Total length	Proximal end of TibioFibular fusion
Tibia	E16	Tibia_WT_E16_p20m1_wt_NA_th105	2.284	0.330093
Tibia	E16	Tibia_WT_E16_p20m2_wt_NA_b_th130	2.428	0.286773
Tibia	E16	Tibia_WT_E16_p20m3_wt_NA_E16_p20m3_mid_th140	2.578	0.342487
Tibia	E17	Tibia_WT_E17_p27m2_wt_NA_th135	2.905	0.335382
Tibia	E17	Tibia_WT_E17_p27m3_wt_NA_E17_p27m3_bottom_th88	3.105	0.332955
Tibia	E17	Tibia_WT_E17_p27m4_wt_NA_th105	3.277	0.341722
Tibia	P0	Tibia_WT_P0_pNAmNA_wt_NA_P0 Collection last_th112	4.205	0.362493
Tibia	P0	Tibia_WT_P0_p24m1_wt_NA_th115	4.348	0.391199
Tibia	P0	Tibia_WT_P0_p25m1_wt_NA_th117	4.409	0.384628
Tibia	P2	Tibia_WT_P2_p34m3_wt_NA_th90	4.998	0.379317
Tibia	P2	Tibia_WT_P2_p24m2_wt_NA_th113	5.081	0.379615
Tibia	P2	Tibia_WT_P2_p25m3_wt_NA_th139	5.181	0.385413
Tibia	P6	Tibia_WT_P6_p35m6_wt_NA_th125	6.621	0.40844
Tibia	P8	Tibia_WT_P8_p26m3_wt_NA_P8_HL_th165	7.394	0.44314
Tibia	P8	Tibia_WT_P8_p24m4_wt_NA_th130	7.526	0.447678
Tibia	P8	Tibia_WT_P8_p26mNA_wt_NA_th125	8.299	0.45695
Tibia	P8	Tibia_WT_P8_p24mNA_wt_NA_th130	8.344	0.430176
Tibia	P8	Tibia_WT_P8_p34m4_wt_NA_th155	8.356	0.421049
Tibia	P10	Tibia_WT_P10_pNAmNA_wt_NA_2-8-2013_th135	8.901	0.422033
Tibia	P10	Tibia_WT_P10_pNAmNA_wt_NA_th140	9.007	0.449224
Tibia	P10	Tibia_WT_P10_pNAmNA_wt_NA_b_th160	9.187	0.432733
Tibia	P20	Tibia_WT_P20_p33m2_wt_R uint8.vff	12.099	0.438797
Tibia	P20	Tibia_WT_P20_p33m3_wt_R uint8.vff	12.5818	0.4427
Tibia	P24	Tibia_WT_P24_p33m2_wt_R uint8.vff	12.8948	0.443543
Tibia	P24	Tibia_WT_P24_p33m4_wt_R uint8.vff	13.1908	0.429212
Tibia	P24	Tibia_WT_P24_p33m1_wt_R uint8.vff	13.3693	0.433603
Tibia	P28	Tibia_WT_P28_p33m2_wt_R uint8.vff	13.7257	0.438366
Tibia	P28	Tibia_WT_P28_p33m1_wt_R uint8.vff	14.0587	0.425965
Tibia	P32	Tibia_WT_P32_p33m2_wt_R uint8.vff	14.108	0.41948
Tibia	P28	Tibia_WT_P28_p33m4_wt_R uint8.vff	14.2322	0.421705
Tibia	P32	Tibia_WT_P32_p33m4_wt_R uint8.vff	14.4814	0.425834
Tibia	P32	Tibia_WT_P32_p33m1_wt_R uint8.vff	14.6578	0.426772
Tibia	P40	Tibia_WT_P40_p33m4_wt_R uint8.vff	15.1741	0.414355
Tibia	P40	Tibia_WT_P40_p33m3_wt_R uint8.vff	15.3373	0.424967
Tibia	P40	Tibia_WT_P40_p33m1_wt_R uint8.vff	15.5505	0.416523
Legend
E - Embryonic
P - Postnatal
Bone ID - the identification string of the bone image in the database
Total length - the distance (mm) from the distal end and the proximal end of the bone
Empty cells indicate that data was not extracted due to an imaging artefact

## Sheet: Fibula
Bone type	Bone age	Bone ID	Total length	Proximal end of TibioFibular fusion
Fibula	E16	Fibula_WT_E16_p20m1_wt_NA_th100	2.06476	0.38285
Fibula	E16	Fibula_WT_E16_p20m2_wt_NA_b_th130	2.14232	0.359208
Fibula	E16	Fibula_WT_E16_p20m3_wt_NA_E16_p20m3_mid_th135	2.36794	0.386807
Fibula	E17	Fibula_WT_E17_p27m2_wt_NA_th135	2.798	0.380652
Fibula	E17	Fibula_WT_E17_p27m3_wt_NA_E17_p27m3_bottom_th90	3.013	0.382616
Fibula	E17	Fibula_WT_E17_p27m4_wt_NA_th110	3.17	0.357459
Fibula	P0	Fibula_WT_P0_pNAmNA_wt_NA_P0 Collection last_th108	4.1
Fibula	P0	Fibula_WT_P0_p24m1_wt_NA_th126	4.114	0.414152
Fibula	P0	Fibula_WT_P0_p25m1_wt_NA_th111	4.205	0.42683
Fibula	P2	Fibula_WT_P2_p34m3_wt_NA_th90	4.777	0.434336
Fibula	P2	Fibula_WT_P2_p25m3_wt_NA_th135	4.936
Fibula	P2	Fibula_WT_P2_p24m2_wt_NA_th121	4.949	0.442477
Fibula	P6	Fibula_WT_P6_p35m6_wt_NA_th125	6.285	0.431965
Fibula	P8	Fibula_WT_P8_p26m3_wt_NA_P8_HL_th165	6.956	0.465029
Fibula	P8	Fibula_WT_P8_p24m4_wt_NA_th130	7.2479	0.480377
Fibula	P8	Fibula_WT_P8_p34m4_wt_NA_th155	7.54	0.450374
Fibula	P8	Fibula_WT_P8_p26mNA_wt_NA_th125	7.978	0.467137
Fibula	P8	Fibula_WT_P8_p24mNA_wt_NA_th130	8.058	0.457283
Fibula	P10	Fibula_WT_P10_pNAmNA_wt_NA_th140	8.619	0.469629
Fibula	P10	Fibula_WT_P10_pNAmNA_wt_NA_2-8-2013_th135	8.619
Fibula	P10	Fibula_WT_P10_pNAmNA_wt_NA_b_th160	8.738	0.466209
Fibula	P20	Fibula_WT_P20_p33m2_wt_R uint8.vff	11.2258	0.475259
Fibula	P20	Fibula_WT_P20_p33m4_wt_R uint8.vff	11.5736	0.479669
Fibula	P20	Fibula_WT_P20_p33m3_wt_R uint8.vff	11.6855	0.481336
Fibula	P24	Fibula_WT_P24_p33m2_wt_R uint8.vff	12.0102	0.481553
Fibula	P24	Fibula_WT_P24_p33m1_wt_R uint8.vff	12.2322	0.477375
Fibula	P24	Fibula_WT_P24_p33m4_wt_R uint8.vff	12.2385
Fibula	P28	Fibula_WT_P28_p33m2_wt_R uint8.vff	12.4222	0.47659
Fibula	P28	Fibula_WT_P28_p33m4_wt_R uint8.vff	12.7586
Fibula	P28	Fibula_WT_P28_p33m3_wt_R uint8.vff	12.7878	0.473236
Fibula	P28	Fibula_WT_P28_p33m1_wt_R uint8.vff	12.8785	0.472428
Fibula	P32	Fibula_WT_P32_p33m2_wt_R uint8.vff	13.2011	0.479135
Fibula	P32	Fibula_WT_P32_p33m4_wt_R uint8.vff	13.2104	0.471999
Fibula	P32	Fibula_WT_P32_p33m1_wt_R uint8.vff	13.2898	0.472089
Fibula	P40	Fibula_WT_P40_p33m3_wt_R uint8.vff	13.9504	0.469638
Fibula	P40	Fibula_WT_P40_p33m4_wt_R uint8.vff	13.9912	0.458931
Fibula	P40	Fibula_WT_P40_p33m1_wt_R uint8.vff	14.104	0.461682
Legend
E - Embryonic
P - Postnatal
Bone ID - the identification string of the bone image in the database
Total length - the distance (mm) from the distal end and the proximal end of the bone
Empty cells indicate that data was not extracted due to an imaging artefact
